# Supplementary material for: Proteomic Landscape Has Revealed Small Rubber Particles Are Crucial Rubber Biosynthetic Machines for Ethylene-Stimulation in Natural Rubber Production
Source: MDPI journal article supplement (doi:10.3390/ijms20205082), 2019-10-14

**Figure S2: MS identification of differentially expressed proteins in small rubber particles from 2D DIGE gels**

Spot No.: **1**

The accumulation patterns of target protein spot on the DIGE gels: (from left to right, the gels for D24, E24, merged for D24 and E24, D48, E48, merged for D48 and E48; arrows indicate the detail position of the target protein spot)

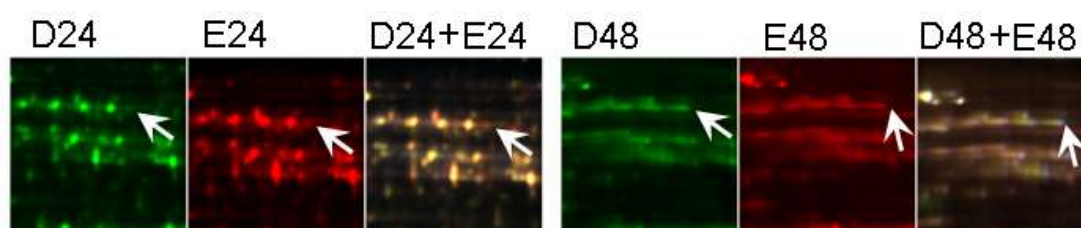

Accession No.: [scaffold1000\\_300919.mRNA1](#)

Plant species: [Hevea brasiliensis](#)

Protein name: [Probable nucleoredoxin 1](#)

**Peptide sequences:** [R.HFTPNLVEVYEK.L](#); [K.GDFEVVFISDR.D](#);  
[K.GDFEVVFISDRDDESFNGYFSK.M](#); [K.MPWLAIPFSDQEIR.K](#);  
[R.DYGAEGYPFPER.L](#); [R.LDYFRQEEENAK.K](#); [R.ALPTLVIGQDGK.T](#);  
[K.TLNPNAELIEDHGIEAYPFTPEK.L](#); [R.LEAQTLESVLVHGDKDFVIEK.S](#);  
[K.LIEAYHEIK.A](#); [R.EHLAAYGADAYPFTEDHLK.Q](#); [K.LKHELHSQHELTR.T](#);  
[K.HELHSQHELTR.T](#); [R.QCDFDLHPK.C](#)

PFF Mascot score: [\[737\]](#)

Sequence coverage %: [\[32\]](#)

Matched peptides No.: [\[14\]](#)

Calculated Mr: [65399](#)

Calculated pI: [5.62](#)

# Annotated PFF spectra:

Ions score is  $-10 \times \log(P)$ , where P is the probability that the observed match is a random event.  
Individual ions scores > 31 indicate identity or extensive homology ( $p < 0.05$ ).  
Protein scores are derived from ions scores as a non-probabilistic basis for ranking protein hits.

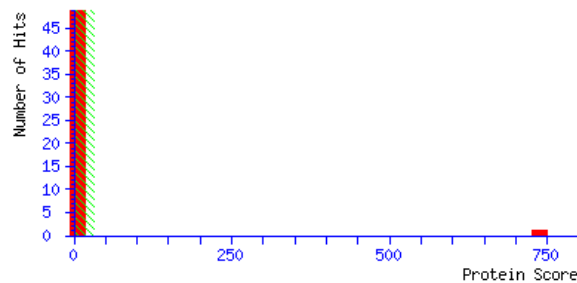

Matched peptide sequences: shown in **Bold Red**

```
1 MANELVGDVS HDLFSLLSAE DRDFLIRNNG DQVKISSLVG KIVGLYFSAS
51 WCGPCRHFTP NLVEVYEKLS SKGDFEVVFI SSDRDESFN GYFSKMPWLA
101 IPFSDQEKIR RLKELFKVRG IPSLVILDTD GKVSCDQGVK IVRDYGAEGY
151 PFTPERLDYF RQEEENAKKN QTLSSILVSS SRDYLSKDG TKVAVSEIEG
201 KMGVLYFSVA SHRCLEFTA KLVVDYKKLK EKGENFEVL ISIDYDEKEF
251 QSLETIPWL AIPFEDKCRE KLARYFELRA LPTLVIIGQD GKTLPNPNVAE
301 LIEDHGIEAY PFTPEKLVEL AEIEKARLEA QTLESVLVHG DKDFVIEKSG
351 SKVAVSELVG KNVLLYFSK WCPPCRFLP KLIEAYHEIK AKDNAFEVIF
401 ISSDRDQSSF DEFYSEMPWL ALPFGDERKT ILQRKFKIKG IPAAIAISPK
451 GQTITKEARE HLAAYGADAY PFTEDHLKQL EEKLEETAKA WPEKLKHELH
501 SQHELTRIKR SGYVCNGCRE MGYLYSFYCR QCDFDLHPKC ALKKEEKGEA
551 EKGKEGWICD GDVCRKA
```

Matched peptide information:

| Start - End | Observed  | Mr(expt)  | Mr(calc)  | ppm | Miss | Sequence                                          |
|-------------|-----------|-----------|-----------|-----|------|---------------------------------------------------|
| 57 - 68     | 1475.8568 | 1474.8495 | 1474.7456 | 70  | 0    | R.HFTFNLVEVYEK.L (Ions score 61)                  |
| 73 - 84     | 1370.7523 | 1369.7450 | 1369.6514 | 68  | 0    | K.GDFEVVFISDR.D (Ions score 30)                   |
| 73 - 95     | 2660.3564 | 2659.3491 | 2659.1715 | 67  | 1    | K.GDFEVVFISDRDESFNQTFSK.M (Ions score 75)         |
| 96 - 109    | 1718.9772 | 1717.9699 | 1717.8498 | 70  | 0    | K.MHWLAIPFSDQEKIR.K Oxidation (H) (Ions score 38) |
| 144 - 156   | 1501.7694 | 1500.7621 | 1500.6521 | 73  | 0    | R.DYGAGYFPTFER.L (Ions score 85)                  |
| 157 - 168   | 1541.8330 | 1540.8257 | 1540.7157 | 71  | 1    | R.LDYFRQEEENAK.K (Ions score 18)                  |
| 280 - 292   | 1324.8561 | 1323.8488 | 1323.7762 | 55  | 0    | R.ALPTLVIIGQDGK.T (Ions score 14)                 |
| 293 - 316   | 2697.5322 | 2696.5249 | 2696.3333 | 71  | 0    | K.TLMPNVARLIEDHGIRAYPPTFER.L (Ions score 10)      |
| 328 - 340   | 2370.4240 | 2369.4175 | 2369.2470 | 72  | 1    | R.LEAQTLIESVLVHGMDPVIEK.S (Ions score 67)         |
| 382 - 390   | 1115.6797 | 1114.6724 | 1114.6022 | 63  | 0    | K.LIEAYEIR.A (Ions score 12)                      |
| 460 - 478   | 2140.1594 | 2147.1521 | 2146.9960 | 73  | 0    | R.HLAAYGADAYPFTEDHLK.Q (Ions score 134)           |
| 495 - 507   | 1627.9839 | 1626.9766 | 1626.8590 | 72  | 1    | K.LKHELSSQHELTR.T (Ions score 87)                 |
| 497 - 507   | 1386.7867 | 1385.7794 | 1385.6800 | 72  | 0    | K.HKLHSQRLTR.Y (Ions score 56)                    |
| 531 - 539   | 1159.5912 | 1158.5839 | 1158.5128 | 61  | 0    | R.QCDFDLHPK.C (Ions score 45)                     |

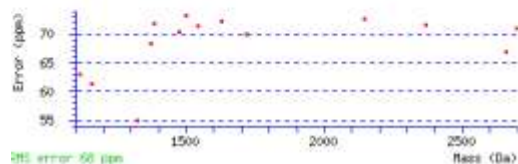

Spot No.: **2**

The accumulation patterns of target protein spot on the DIGE gels:

(from left to right, the gels for D24, E24, merged for D24 and E24, D48, E48, merged for D48 and E48; arrows indicate the detail position of the target protein spot)

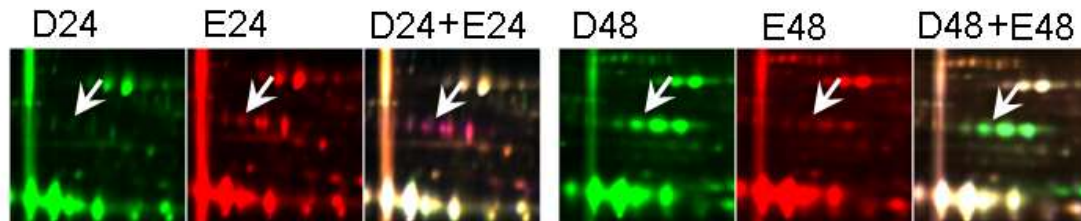

Accession No.: [scaffold0560\\_404767.mRNA1](#)

Plant species: [Hevea brasiliensis](#)

Protein name: [Metacaspase-4](#)

**Peptide sequences:** [R.SAEPGDLLFVHYSGHGTRL](#); [R.EFVDQVPHGCRI](#); [K.QTIQDAFESR](#); [R.VVEEDYGDSGYVK](#); [K.LRPTLFDMFGDDASPK](#)

PFF Mascot score: [\[137\]](#) Sequence coverage %: [\[16\]](#)

Matched peptides No.: [\[5\]](#)

Calculated Mr: [46443](#)

Calculated pI: [5.01](#)

### Annotated PFF spectra:

Ions score is  $-10 \cdot \log(P)$ , where P is the probability that the observed match is a random event.

Individual ions scores  $> 31$  indicate identity or extensive homology ( $p < 0.05$ ).

Protein scores are derived from ions scores as a non-probabilistic basis for ranking protein hits.

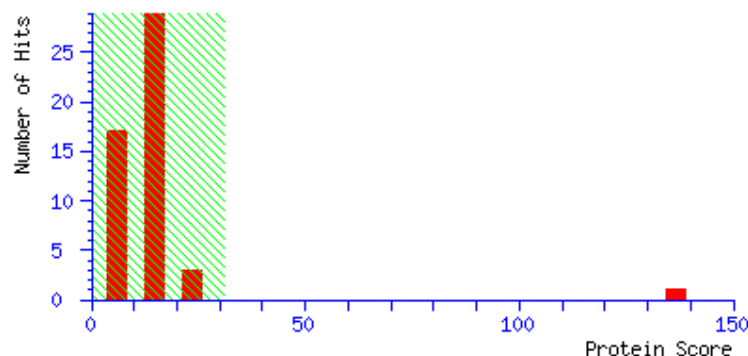

Matched peptide sequences: shown in **Bold Red**

```

1  MAKKAVLIGI NYPGTKAELK GCINDVKRMY RCLVDRYGFS EEDITVLIDI
51  DESYIQPTGK NIRRVLTDLV RSAEPGDLLF VHYSGHGTRL PAETGEDDDT
101 GFDECIVPCD MNLIITDDDFR EFVDQVPHGC RITVVSDSCH SGGLIDEAKE
151 QIGESTKRKE EESSESGFGFK SFLKQTIQDA FESRGVHLPS DLHHHHGHRD
201 EEDFDNRVVE EDYGDSGYVK SKSLPLSTLI EILKQKTGKD DIDVGKLRPT
251 LFDMPGDDAS PKVKKFMKVI LNKLRHGDGE SGGGGFLGMV GSLAQEFLKH
301 KLDENDESIV KPALETEVDS KQEVYAGTK RSLPDGGILI SGCQTDQISA
351 DASPSGKSSE AYGALSNAIQ TIIAETDGAV TNQELVLKAR KMLKKQGFTQ
401 KPGLYCSDDH VEASFVC

```

Matched peptide information:

| Start - End | Observed  | Mr (expt) | Mr (calc) | ppm | Miss Sequence                                                          |
|-------------|-----------|-----------|-----------|-----|------------------------------------------------------------------------|
| 72 - 89     | 1943.0193 | 1942.0120 | 1941.9333 | 41  | 0 R.SAEPGDLLFVHSYGHOTR.L ( <a href="#">ions score 24</a> )             |
| 121 - 131   | 1343.6781 | 1342.6708 | 1342.6088 | 46  | 0 R.EFVDQVPHGR.I ( <a href="#">ions score 45</a> )                     |
| 175 - 184   | 1194.6357 | 1193.6284 | 1193.5677 | 51  | 0 K.QTIQDAFRR.G ( <a href="#">ions score 33</a> )                      |
| 208 - 220   | 1459.7251 | 1458.7178 | 1458.6515 | 45  | 0 R.VVEEDYGDSTVK.S ( <a href="#">ions score 10</a> )                   |
| 247 - 262   | 1825.9493 | 1824.9420 | 1824.8716 | 39  | 1 K.LRPTLFDMPGDDASPK.V Oxidation (M) ( <a href="#">ions score 25</a> ) |

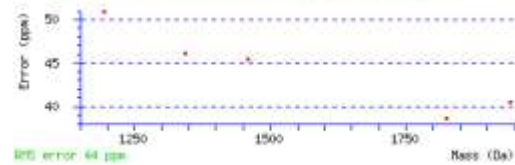

Spot No.: **3**

The accumulation patterns of target protein spot on the DIGE gels:

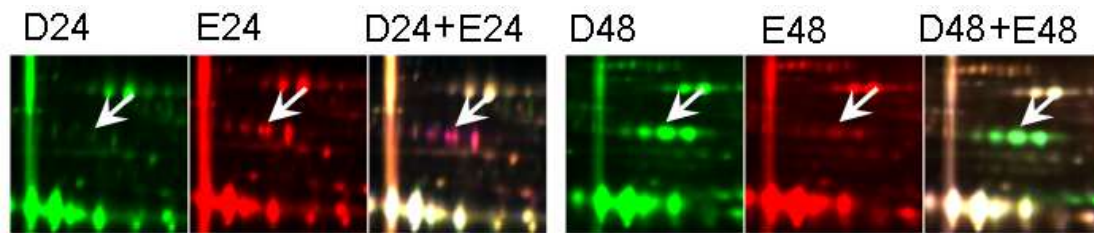

Accession No.: **scaffold0560\_404767.mRNA1**

Plant species: ***Hevea brasiliensis***

Protein name: **Metacaspase-4**

**Peptide sequences:** **R.VLTDLVR.S; R.SAEPGDLLFVHYSGHGTR.L;**  
**R.EFVDQVPHGCR.I; K.QTIQDAFESR.G; K.LRPTLFDMFGDDASPK.V;**  
**K.LRPTLFDMFGDDASPK.V**

PFF Mascot score: **[338]**

Sequence coverage %: **[14]**

Matched peptides No.: **[6]**

Calculated Mr: **46443**

Calculated pI: **5.01**

### Annotated PFF spectra:

Ions score is  $-10 \cdot \log(P)$ , where P is the probability that the observed match is a random event. Individual ions scores  $> 32$  indicate identity or extensive homology ( $p < 0.05$ ). Protein scores are derived from ions scores as a non-probabilistic basis for ranking protein hits.

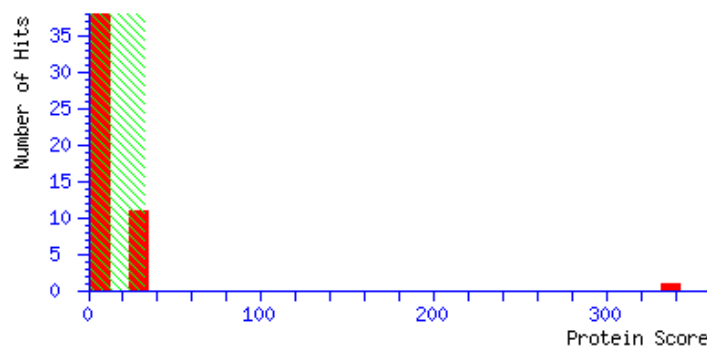

Matched peptide sequences: shown in **Bold Red**

```

1  MAKKAVLIGI NYPGTKAELK GCINDVKRMY RCLVDRYGFS EEDITVLIDI
51  DESYIQPTGK NIRRVLTDLV RSAEPGDLLE VHYSGHGTRL PAETGEDDDT
101 GFDECIVPCD MNLITDDDFR EFVDQVPHGC RITVVSDSCH SGGLIDEAKE
151 QIGESTKRKE EESGSGFGFK SFLKQTIQDA FESRGVHLPS DLHHHHGHRD
201 EEDFDNRVVE EDYGDGSGYVK SKSLPLSTLI EILKQKTGKD DIDVGKLRPT
251 LFDMFGDDAS PKVKKFMKVI LNKLRHGDGE SGGGGFLGMV GSLAQEFLKH
301 KLDENDESIV KPALETEVDS KQEVYAGKTK RSLPDGGILI SGCQTDQISA
351 DASPSGKSSE AYGALSNAIQ TIIAETDGAV TNQELVLKAR KMLKKQGFTQ
401 KPGLYCSDDH VEASFVC

```

Matched peptide information:

| Start - End | Observed  | Mr (expt) | Mr (calc) | ppm | Miss Sequence                                                          |
|-------------|-----------|-----------|-----------|-----|------------------------------------------------------------------------|
| 65 - 71     | 815.4955  | 814.4883  | 814.4913  | -4  | 0 R.VLTDLVH.S ( <a href="#">Ions score 27</a> )                        |
| 72 - 89     | 1942.9210 | 1941.9137 | 1941.9333 | -10 | 0 R.SAEPGDLLEVHYSGHGTRL.L ( <a href="#">Ions score 104</a> )           |
| 121 - 131   | 1342.6027 | 1342.5954 | 1342.6088 | -10 | 0 R.EFVDQVPHGC.I ( <a href="#">Ions score 77</a> )                     |
| 175 - 184   | 1194.5636 | 1193.5563 | 1193.5677 | -9  | 0 K.QTIQDAFESR.G ( <a href="#">Ions score 57</a> )                     |
| 247 - 262   | 1809.8607 | 1808.8534 | 1808.8767 | -13 | 1 K.LRPTLFDMFGDDASPK.V ( <a href="#">Ions score 72</a> )               |
| 247 - 262   | 1825.8291 | 1824.8218 | 1824.8716 | -27 | 1 K.LRPTLFDMFGDDASPK.V Oxidation (R) ( <a href="#">Ions score 18</a> ) |

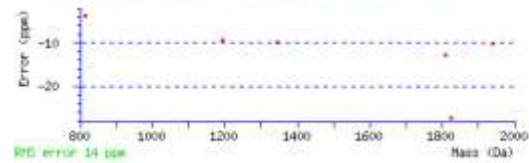

Spot No.: **4**

The accumulation patterns of target protein spot on the DIGE gels:

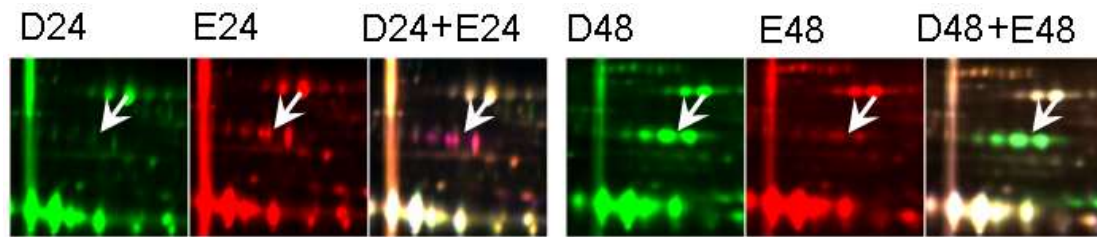

Accession No.: **scaffold0560\_404767.mRNA1**

Plant species: ***Hevea brasiliensis***

Protein name: **Metacaspase-4**

**Peptide sequences:** **R.SAEPGDLLFVHYSGHGTRL**; **K.QTIQDAFESR**.G ;  
**R.LPAETGEDDDTGFDECIVPCDMNLITDDDFR**.E; **R.EFVDQVPHGCR**.I;  
**R.GVHLPSDLHHHHGHR**.D; **R.GVHLPSDLHHHHGHRDEEDFDNR**.V;  
**K.LRPTLFDMFGDDASPK**.V; **R.HGDGESGGGFLGMVGS LAQEFLK**.H;  
**K.SSEAYGALSNAIQTTIAETDGAVTNQELVLK**.A

PFF Mascot score: **[855]** Sequence coverage %: **[39]**

Matched peptides No.: **[9]**

Calculated Mr: **46443** Calculated pI: **5.01**

### Annotated PFF spectra:

Ions score is  $-10 \cdot \log(P)$ , where P is the probability that the observed match is a random event.  
Individual ions scores  $> 30$  indicate identity or extensive homology ( $p < 0.05$ ).  
Protein scores are derived from ions scores as a non-probabilistic basis for ranking protein hits.

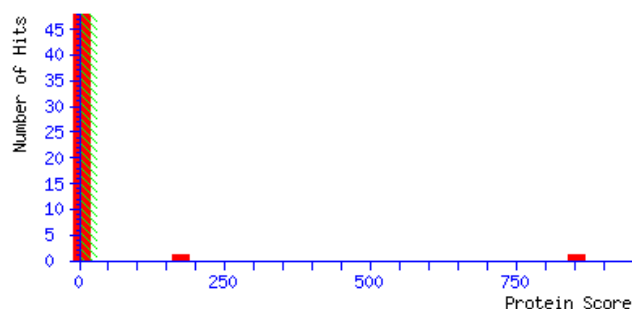



Matched peptide sequences: shown in **Bold Red**

```

1  MAKKAVLIGI NYPGTKAELK GCINDVKRMY RCLVDRYGFs EEDITVLIDI
51  DESYIQPTGK NIRRVLTDLV RSAEPGDLIF VHYSGHGTRL PAETGEDDDT
101 GFDECIVPCD MNLITDDDFR EFVDQVPHGC RITVVSDSCH SGGLIDEAKE
151 QIGESTKRKE EESGSGFGFK SFLKQTIQDA FESRGVHLPS DLHHHHGHRD
201 EEDFDNRVVE EDYDGSgyvk SKSLPLSTLI EILKQKTGKD DIDVGKLRPT
251 LDFMFGDDAS PKVKKFMKVI LNKLRHGDGE SGGGGFLGMV GSIAQEFLKH
301 KLDENDESyV KPALETEVDS KQEVYAGKTK RSLPDGGILI SGCQTDQISA
351 DASPSGKSSE AYGALSNAIQ TIIAETDGAV TNQELVLKAR KMLKKQGFTQ
401 KPGLYCSDDH VEASFVC

```

Matched peptide information:

| Start - End | Observed  | Mr(expt)  | Mr(calc)  | ppm | Miss | Sequence                                            |
|-------------|-----------|-----------|-----------|-----|------|-----------------------------------------------------|
| 79 - 89     | 1942.8949 | 1941.8876 | 1941.9333 | -24 | 0    | R.SAEPGDLIFVHYSGHGTRL.L (Ions score 139)            |
| 90 - 120    | 3575.3813 | 3574.3740 | 3574.4698 | -27 | 0    | R.LEAETGDDDTGFDECIVPCDMNLITDDDFR.E (Ions score 146) |
| 121 - 131   | 1343.5896 | 1342.5823 | 1342.6088 | -20 | 0    | R.EFVDQVPHGC.I (Ions score 71)                      |
| 175 - 184   | 1194.5493 | 1193.5420 | 1193.5677 | -21 | 0    | K.QTIQDAFESR.G (Ions score 65)                      |
| 185 - 199   | 1735.8248 | 1734.8175 | 1734.8564 | -22 | 0    | R.GVHLPSDLHHHHGHR.D (Ions score 87)                 |
| 185 - 207   | 2756.1868 | 2755.1795 | 2755.2348 | -20 | 1    | R.GVHLPSDLHHHHGHRDEDFNR.V (Ions score 33)           |
| 247 - 262   | 1809.0430 | 1808.8357 | 1808.8767 | -23 | 1    | K.LRPTLDFMFGDDASPK.V (Ions score 95)                |
| 276 - 299   | 2350.0518 | 2349.0445 | 2349.1060 | -26 | 0    | R.HGDESGGGGFLGMVSLAQEFLK.H (Ions score 116)         |
| 358 - 388   | 3206.5674 | 3205.5601 | 3205.6354 | -23 | 0    | K.SSEAYGALSNAIQTIIAETDGAVTNQELVLK.A (Ions score 81) |

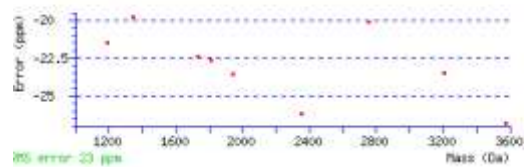



Spot No.: **5**

The accumulation patterns of target protein spot on the DIGE gels:

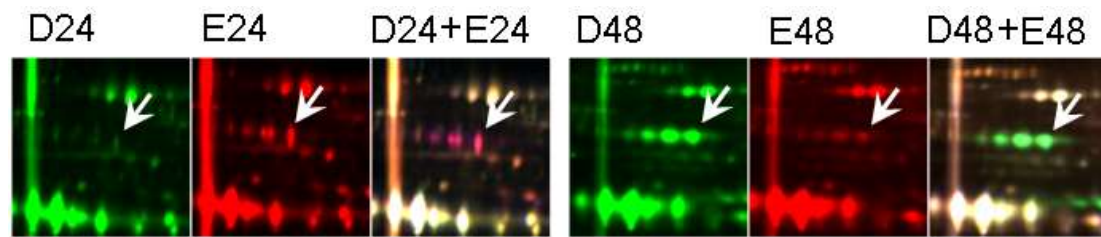

Accession No.: [scaffold0560\\_404767.mRNA1](#)

Plant species: *Hevea brasiliensis*

Protein name: **Metacaspase-4**

**Peptide sequences:** **R.SAEPGDLLFVHYSGHGTRL**; **R.EFVDQVPHGCRI**;  
**R.LPAETGEDDDTGFDECIVPCDMNLITDDDFR**.E; **K.QTIQDAFESR**.G;  
**R.GVHLPSDLHHHHGHR**.D; **R.DEEDFDNRVVEEDYGDSGYVK**.S;  
**R.VVEEDYGDSGYVK**.S; **K.LRPTLFDMFGDDASPK**.V;  
**R.HGDGESGGGGFLGMVGSLAQEFLK**.H

PFF Mascot score: **[786]**      Sequence coverage %: **[35]**

Matched peptides No.: **[9]**

Calculated Mr: **46443**      Calculated pI: **5.01**

### Annotated PFF spectra:

Ions score is  $-10 \cdot \log(P)$ , where P is the probability that the observed match is a random event.

Individual ions scores  $> 30$  indicate identity or extensive homology ( $p < 0.05$ ).

Protein scores are derived from ions scores as a non-probabilistic basis for ranking protein hits.

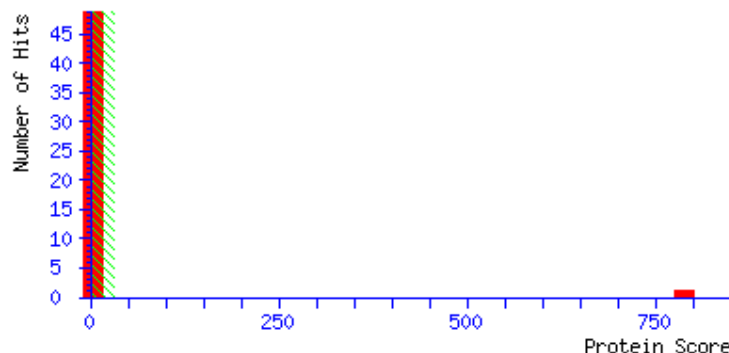

Matched peptide sequences: shown in **Bold Red**

```

1  MAKKAVLIGI NYPGTKAELK GCINDVKRMY RCLVDRYGFS EEDITVLIDI
51  DESYIQPTGK NIRRVLTDLV RSAEPGDLLE VHYSGHGTRL PAETGEDDDT
101 GFDECIVPCD MNLITDDDFR EFVDQVPHGC RITVWSDSCH SGGLIDEAKE
151  QIGESTKRKE EEESGFGFK SFLKQTIQDA FESRGVHLPS DLHHHHGHRD
201 EEDFDNRVVE EDYGDSGYVK SKSLPLSTLI EILKQKTGKD DIDVGKLRPT
251 LDFMFGDDAS PKVKKFMKVI LNKLRHGDGE SGGGGFLGMV GSIAQEFLKH
301  KLDENDESIV KPALETEVDS KQEVYAGTK RSLPDGGILI SGCQTDQISA
351  DASPSGKSSE AYGALSNAIQ TIIAETDGAV TNQELVLKAR KMLKKQGFTQ
401  KPGLYCSDDH VEASFVC

```

Matched peptide information:

| Start - End | Observed  | Mr (expt) | Mr (calc) | ppm | Mass Sequence                                         |
|-------------|-----------|-----------|-----------|-----|-------------------------------------------------------|
| 72 - 89     | 1942.9321 | 1941.9248 | 1941.9333 | -4  | 0 R.SAKPGDLLPVHYSGHGTRL.L (Ions score 121)            |
| 90 - 120    | 3575.4709 | 3574.4636 | 3574.4698 | -2  | 0 R.LPAETGEDDDTGFDNCIVPCDNLITDDDFR.E (Ions score 105) |
| 121 - 131   | 1343.6149 | 1342.6076 | 1342.6088 | -1  | 0 R.EFVDQVPHGC.I (Ions score 88)                      |
| 175 - 184   | 1194.5731 | 1193.5658 | 1193.5677 | -2  | 0 K.QTIQDAFESR.G (Ions score 92)                      |
| 185 - 199   | 1735.8535 | 1734.8462 | 1734.8564 | -6  | 0 R.GVHLPSDLHHHHGHR.D (Ions score 77)                 |
| 200 - 220   | 2480.0283 | 2479.0210 | 2479.0299 | -4  | 1 R.DEEDFDNRVVEEDYGDSDGYVK.S (Ions score 18)          |
| 208 - 220   | 1459.6484 | 1458.6411 | 1458.6515 | -7  | 0 R.VVEEDYGDSDGYVK.S (Ions score 83)                  |
| 247 - 262   | 1809.8781 | 1808.8708 | 1808.8767 | -3  | 1 K.LRPTLDFMFGDDASPK.V (Ions score 90)                |
| 276 - 299   | 2350.1011 | 2349.0938 | 2349.1060 | -5  | 0 R.HGGGSGGGGFLGMVGSIAQEFLK.E (Ions score 132)        |

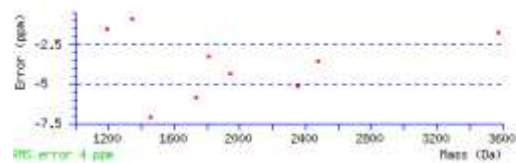

Spot No.: **6**

The accumulation patterns of target protein spot on the DIGE gels:

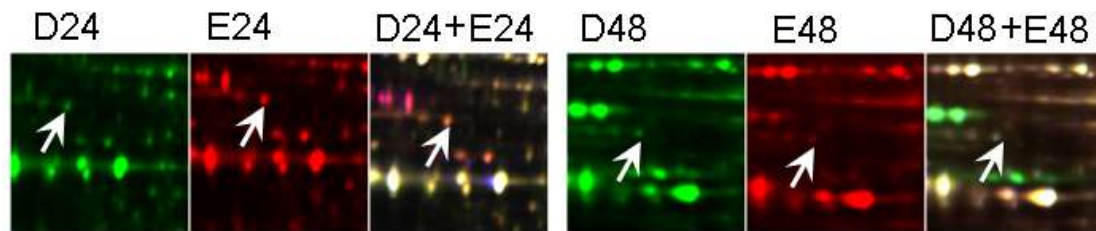

Accession No.: **scaffold0829\_389953.mRNA1**

Plant species: ***Hevea brasiliensis***

Protein name: **Tubulin alpha-3 chain**

**Peptide sequences:** **R.AVFVDLEPTVIDEVR.T; R.QLFHPEQLISGK.E;**  
**R.FDGAINVDVTEFQTNLVPYPR.I; K.CGINYQPPTVVPGGDLAR.V;**  
**R.AFVHWYVGEGMEEGEFSEAR.E**

PFF Mascot score: **[451]** Sequence coverage %: **[19]**

Matched peptides No.: **[5]**

Calculated Mr: **50244** Calculated pI: **5.00**

### Annotated PFF spectra:

Ions score is  $-10 \cdot \log(P)$ , where P is the probability that the observed match is a random event. Individual ions scores  $> 31$  indicate identity or extensive homology ( $p < 0.05$ ). Protein scores are derived from ions scores as a non-probabilistic basis for ranking protein hits.

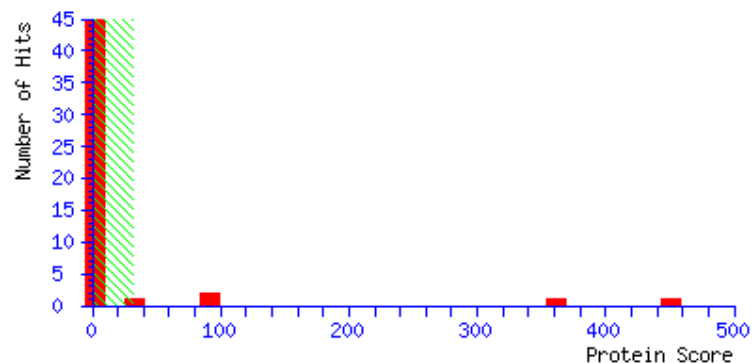

Matched peptide sequences: shown in **Bold Red**

```

1  MREIISIHIG QAGIQVGNCS WELYCLEHGI HPDGMMPSDT SVGVAHDAFN
51  TFFSETGSGK HVPRAVFVDL EPTVIDEVRT GPYRQLFHPE QLISGKEDAA
101 NNFARGHYTV GKEIVDLCLD RVRKLADNCT GLQGFLVFNA VGGGTGSGLG
151 SLLLERLSVD YGKKSCLGFT IYPSPQVSTA VVEPYNSVLS THSLEHTDV
201 AVLLDNEAIY DICRRSLDIE RPTYTNLNRL ISQISSLIT SLRFDGAINV
251 DVTEFQTNLV PYPRIHFMLS SYAPVISA EK AYHEQLSVPE ITNAVFEPS
301 MMAKCDPRHG KYMACCLMYR GDVVPKDVNA AVATIKIKRT VQFVDWCPTG
351 FKCGINYQPP TVVPGDLAR VQRAVCMISN NTAAAEVFSR IDHKFDLMYA
401 KRAFVHWYVG EGMEEGEPSE AREDLAALK DYEEVGAEGG DDEEEGEDY

```

Matched peptide information:

| Start - End | Observed  | Mr (expt) | Mr (calc) | ppm | Miss Sequence                                |
|-------------|-----------|-----------|-----------|-----|----------------------------------------------|
| 65 - 79     | 1701.8055 | 1700.7982 | 1700.8985 | -59 | 0 R.AVFVDLEPTVIDEVR.T (ions score 89)        |
| 85 - 96     | 1396.6731 | 1395.6658 | 1395.7510 | -61 | 0 R.QLFHPEQLISGK.E (ions score 64)           |
| 244 - 264   | 2395.0469 | 2394.0396 | 2394.1856 | -61 | 0 R.FDGAINVDVTEFQTNLVYPYR.I (ions score 100) |
| 353 - 370   | 1913.0304 | 1912.0311 | 1912.9465 | -60 | 0 K.CGINYQPPTVVPGDLAR.V (ions score 90)      |
| 403 - 422   | 2329.0765 | 2328.0692 | 2329.0110 | -61 | 0 R.AFVHWYVGEGMEEGEPSEAR.E (ions score 105)  |

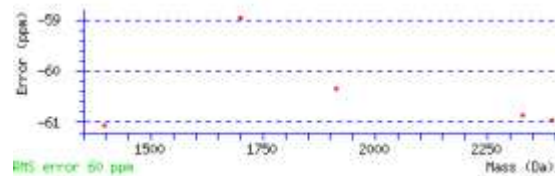

Spot No.: **7**

The accumulation patterns of target protein spot on the DIGE gels:

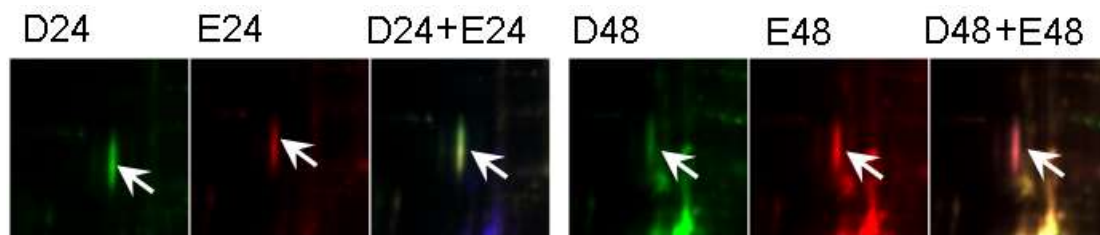

Accession No.: **scaffold5971\_1039.mRNA1**

Plant species: ***Hevea brasiliensis***

Protein name: **Inactive GDSL esterase/lipase-like protein 25**

**Peptide sequences:** **K.YLPSYHHPYGTTFDYPTGR.F;**  
**R.TVVDFVAENVSLPR.I; K.AVYLISFGADDYLYEIPSEASR.E; K.ELYDFGAR.K;**  
**R.EQLESIVDVVLGNISDR.I; R.IKELYDFGAR.K; K.EIIDAPGEHGFK.Y**

PFF Mascot score: **[419]** Sequence coverage %: **[26]**

Matched peptides No.: **[7]**

Calculated Mr: **41480** Calculated pI: **4.60**

### Annotated PFF spectra:

Ions score is  $-10 \cdot \log(P)$ , where P is the probability that the observed match is a random event.  
Individual ions scores  $> 31$  indicate identity or extensive homology ( $p < 0.05$ ).  
Protein scores are derived from ions scores as a non-probabilistic basis for ranking protein hits.

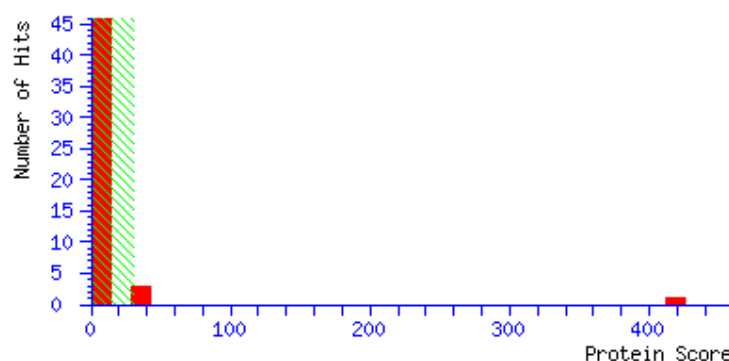

Matched peptide sequences: shown in **Bold Red**

```

1 MASLAYSLEFI LSLFTFTLLN PVCSELDEYL FSFGDGLYDA GNAKFIYPDK
51 YLPSYHHYPG TTFDDYPTGR FSDGRTVVDF VAENVSLPRI PPFKNKEANF
101 TYGANFASEG ATASDSNPLI DFRSQIRDFG ELKLEWAVQL VNVTELARRL
151 KKAVYLISFG ADDYLNIEIP SEASREQLES IVDVVLGNIS DRIKELYDFG
201 ARKFVVENVA PLGLIPFIKQ TSDNSTLFYE LASLHAMKLP QILEKIQDGY
251 LFPEFNYTVF NYFGIIKEII DAPGEHGFKY GDIACCGNST YRQQACGFLD
301 YEFVCVGNKT EYLFFDGIHN TDAANNLLAE LMWDKESGFI SPYGVKDFFP
351 SPTTIQTLLT EATALG

```

Matched peptide information:

| Start - End | Observed  | Mr(expt)  | Mr(calc)  | ppm | Miss Sequence                                 |
|-------------|-----------|-----------|-----------|-----|-----------------------------------------------|
| 51 - 70     | 2419.2244 | 2418.2171 | 2418.1069 | 46  | 0 K.YLPSYHHYPGTTFFDYPTGR.F (Ions score 50)    |
| 76 - 89     | 1545.9088 | 1544.9015 | 1544.8199 | 53  | 0 R.TVVDFVARNVSLPR.I (Ions score 48)          |
| 153 - 175   | 2593.3601 | 2592.3528 | 2592.2384 | 44  | 0 K.AVYLISFGADDYLNIEIPSEASR.E (Ions score 70) |
| 176 - 192   | 1886.0894 | 1885.0821 | 1884.9793 | 55  | 0 R.EQLESIVDVVLGNISDR.I (Ions score 100)      |
| 193 - 202   | 1211.7180 | 1210.7107 | 1210.6346 | 63  | 1 R.IKELYDFGAR.K (Ions score 62)              |
| 195 - 202   | 970.5330  | 969.5257  | 969.4556  | 72  | 0 K.ELYDFGAR.K (Ions score 5)                 |
| 268 - 279   | 1312.7219 | 1311.7146 | 1311.6459 | 52  | 0 K.EIIDAPGEHGFKY.Y (Ions score 85)           |

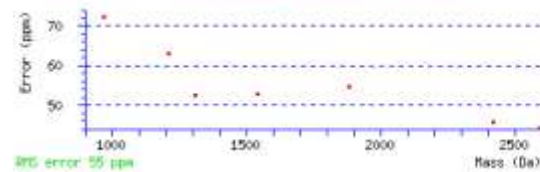

Spot No.: **8**

The accumulation patterns of target protein spot on the DIGE gels:

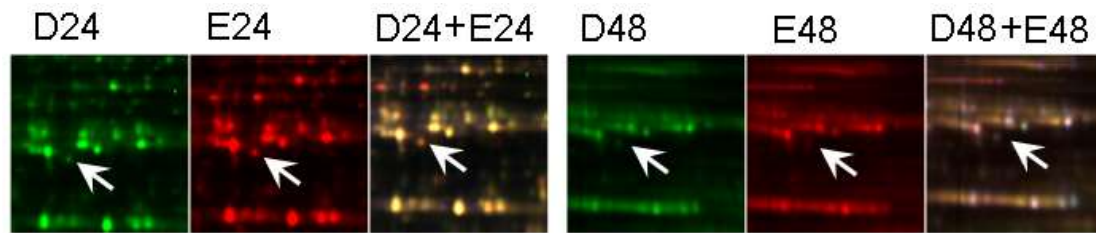

Accession No.: **scaffold2091\_1808.mRNA1**

Plant species: ***Hevea brasiliensis***

Protein name: **Elongation factor 1-gamma**

**Peptide sequences:** **K.VPVLETPDGPLFESNAIAR.Y;**

**R.MGFAPYLPPAEAAISALKR.G; K.SFTSEFPHVER.Y; R.YFWTMVNQPNFK.K;  
K.MILDEWKR.L; K.YNDENTVSFVTLNK.V; R.GQEIPQFVIDECYDMELYEWK.K;  
R.VNQMIEDQEPFEGEPLLDK.C**

PFF Mascot score: **[523]**

Sequence coverage %: **[29]**

Matched peptides No.: **[8]**

Calculated Mr: **48685**

Calculated pI: **5.69**

### Annotated PFF spectra:

Ions score is  $-10 \cdot \log(P)$ , where P is the probability that the observed match is a random event.

Individual ions scores  $> 31$  indicate identity or extensive homology ( $p < 0.05$ ).

Protein scores are derived from ions scores as a non-probabilistic basis for ranking protein hits.

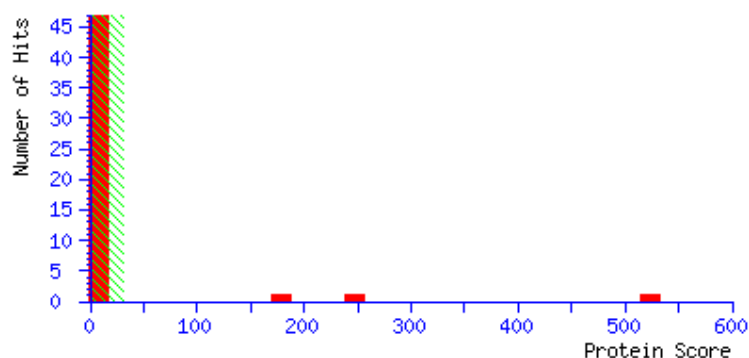



Matched peptide sequences: shown in **Bold Red**

```

1 MALVLHAGKT NKNFAFKSLIA AEYSGVKVEL VENFEMGVSN KTPEFLKMNP
51 IGKVPVLETP DGPLFESNAI ARYVTRLKAD NPLYDSSLID YAHIEQWIDF
101 ASLEIDANLM AWLRPRMGFA PYLPPAEAA ISALKRGLGA LNTHLASNTY
151 LVGHSVTLAD IITTCNLYMG FALLMTKSFT SEFPHVERYF WTMVNQPNFK
201 KILGEVKQTE SVLPVQSTKK PAQPKESAKS KRKDEPKKEA KTEKEPAKPK
251 EAAEEEEEEAP KPKPKNPLDL LPPSKMILDE WKRLYSNTKT NFREVAIKGF
301 WDMYDPEGYS LWFCDYKYND ENTVSFVTLN KVSGFLQRM LARKYAFGKM
351 LVIGENPPYK VKGLWLFRQ EIPQFVIDEC YDMELYEWKK VDISDEAQKE
401 RVNQMIEDQE PFEGEPLDA KCFK

```

Matched peptide information:

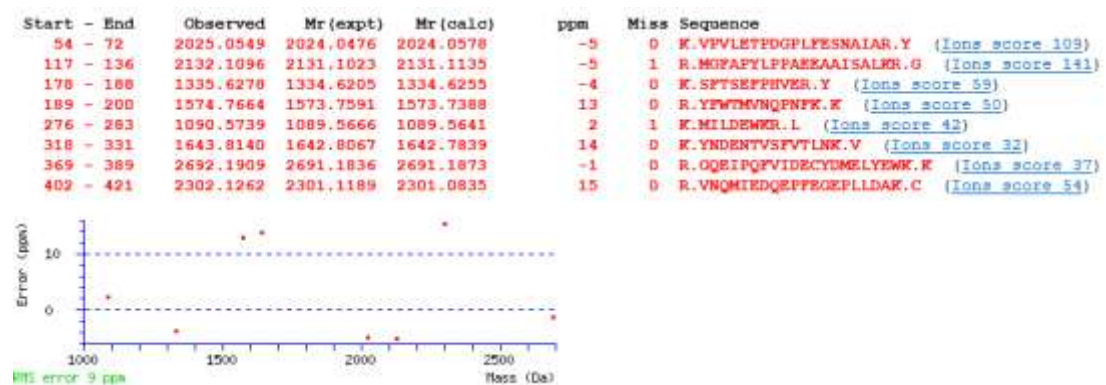

Spot No.: **9**

The accumulation patterns of target protein spot on the DIGE gels:

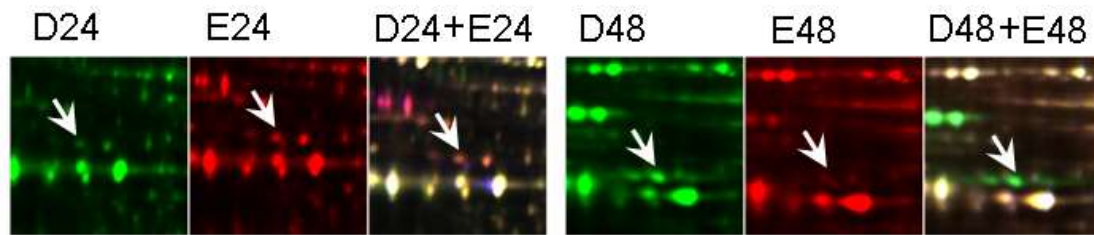

Accession No.: **scaffold1072\_242122.mRNA1**

Plant species: ***Hevea brasiliensis***

Protein name: **Phospholipase A1-IIdelta**

**Peptide sequences:** **K.VMLEDAANYQVCSFIYGTR.V; R.EIYIAFR.G;**  
**K.LESAEPLLR.G; K.IDVIPHYPGRL; R.YTGTELEIDTR.K**

PFF Mascot score: **[242]**      Sequence coverage %: **[13]**

Matched peptides No.: **[5]**

Calculated Mr: **47415**      Calculated pI: **5.47**

### **Annotated PFF spectra:**

Ions score is  $-10 \cdot \log(P)$ , where P is the probability that the observed match is a random event. Individual ions scores  $> 31$  indicate identity or extensive homology ( $p < 0.05$ ). Protein scores are derived from ions scores as a non-probabilistic basis for ranking protein hits.

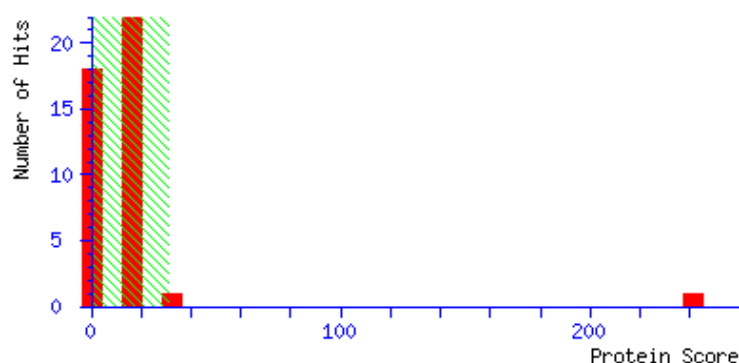

Matched peptide sequences: shown in **Bold Red**

```

1  METPSTQEPT WPEILGSKNW ENLLDPLDLT VRKLILRCGD FCQATYDSFN
51 NDENSKYCGT SRYGKKDFFQ KVMLEDAANY QVCSFIYGTA RVSLPEAAILL
101 HSMTRDSWDR ESNWIGYIAV TSDEYTKVIG RREIYIAFRG TTRNYEWNVI
151 LGAKLESAEP LLRGSSQNVE EANSQSDDSDN EDNRKVPKVM LGWLTIIYISD
201 NQESPFTKLS ARQQLVTKIN QLKEQYRDEN LSIILTGHSL GATLSILAALF
251 DLVENGITDI PVAAFVFGSP QVGNKAFNSR LNKYPNLKVL HIKNKIDVIP
301 HYPGRLLGYR YTGTELEIDT RKSPNLKDSK HTGDWHNLQA MLHIVAGWNG
351 EKGEFMLRVK RSLALVNKSC EFLKDECMVP GSWWIEKNKG MVRGEDGEWT
401 MASPDEEDQP VPEF

```

Matched peptide information:

| Start - End | Observed  | Mr (expt) | Mr (calc) | ppm | Miss Sequence                                     |
|-------------|-----------|-----------|-----------|-----|---------------------------------------------------|
| 72 - 91     | 2307.9888 | 2306.9815 | 2307.0664 | -37 | 0 <b>K.VMLEDAANYQVCSFIYGTA</b> .V (ions score 89) |
| 133 - 139   | 911.4761  | 910.4689  | 910.4912  | -25 | 0 <b>R.EIYIAFR</b> .G (ions score 60)             |
| 155 - 163   | 1027.5502 | 1026.5429 | 1026.5709 | -27 | 0 <b>K.LESAEPLLR</b> .G (ions score 19)           |
| 296 - 305   | 1166.6019 | 1165.5946 | 1165.6244 | -26 | 0 <b>K.IDVIPHYGR</b> .L (ions score 44)           |
| 311 - 321   | 1297.6023 | 1296.5950 | 1296.6198 | -19 | 0 <b>R.YTGTELEIDTR</b> .K (ions score 30)         |

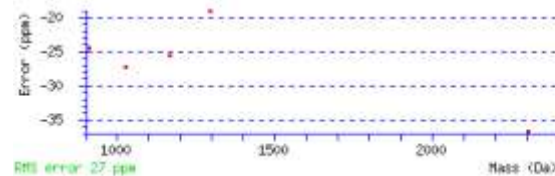

Spot No.: **10**

The accumulation patterns of target protein spot on the DIGE gels:

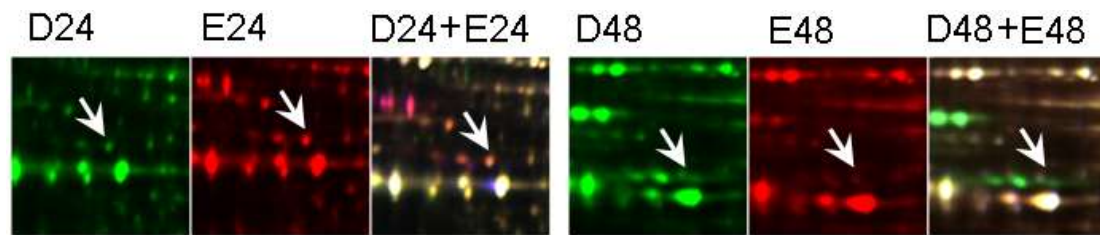

Accession No.: **scaffold1072\_242122.mRNA1**

Plant species: ***Hevea brasiliensis***

Protein name: **Phospholipase A1-IIdelta**

**Peptide sequences:** **K.NWENLLDPLDLTVR.K; R.EIYIAFR.G;**  
**K.VMLEDAANYQVCSFIYGTR.V; R.VSLPEAILLHSMTR.D; K.LESAEPLLR.G;**  
**K.NKIDVIPHYPGRL; K.IDVIPHYPGRL; R.YTGTELEIDTR.K**

PFF Mascot score: **[703]** Sequence coverage %: **[21]**

Matched peptides No.: **[8]**

Calculated Mr: **47415** Calculated pI: **5.47**

### Annotated PFF spectra:

Ions score is  $-10 \cdot \log(P)$ , where P is the probability that the observed match is a random event. Individual ions scores  $> 31$  indicate identity or extensive homology ( $p < 0.05$ ). Protein scores are derived from ions scores as a non-probabilistic basis for ranking protein hits.

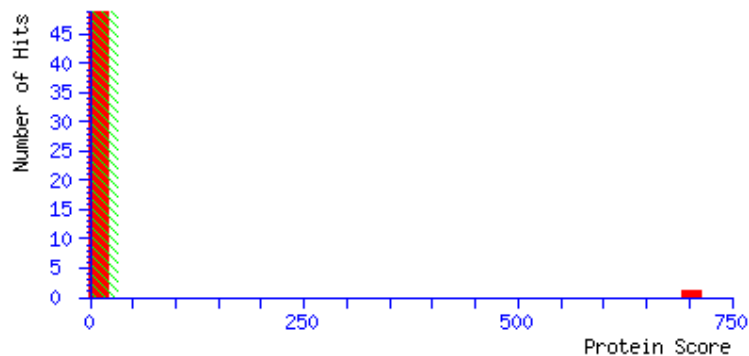

Matched peptide sequences: shown in **Bold Red**

```

1  METPSTQEPT WPEILGSKNW ENLLDPLDLT VRKLILRCGD FCQATYDSFN
51 NDENSKYCGT SRYGKKDFFQ KVMLEDAANY QVCSFIYGTA RVSLPEAILL
101 HSMTRDSWDR ESNWIGYIAV TSDEYTKVIG RREIYIAFRG TTRNIEWVNI
151 LGAKLESAEP LLRGSSQNVE EANSGSSDSN EDNRKVPKVM LGWLTIIYISD
201 NQESPFTKLS ARQQLVTKIN QLKEQYRDEN LSIILTGHSL GATLSILAAF
251 DLVENGITDI PVAAFVFGSP QVGNKAFNSR LNKYPNLKVL HIKNKIDVIP
301 HYPGRLLLGYR YTGTELEIDT RKSPNLKDSK HTGDWHNLQA MLHIVAGWNG
351 EKGEFMLRVK RSLALVNKSC EFLKDECMVP GSWWIEKNKG MVRGEDGEWT
401 MASPDEEDQP VPEF

```

Matched peptide information:

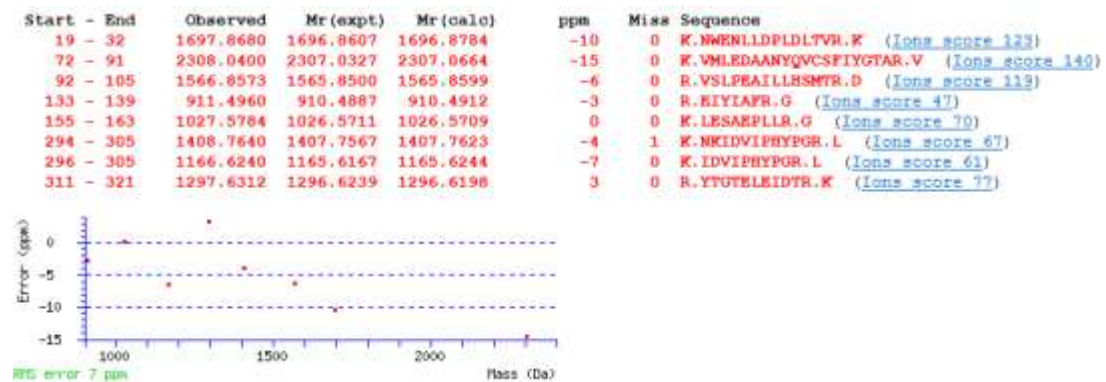

Spot No.: **11**

The accumulation patterns of target protein spot on the DIGE gels:

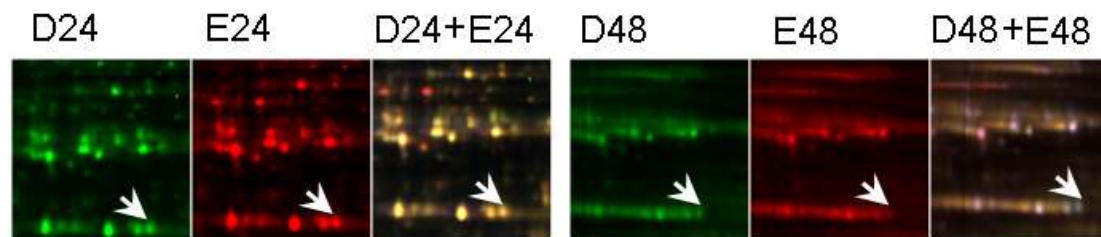

Accession No.: [scaffold0947\\_141222.mRNA1](#)

Plant species: *Hevea brasiliensis*

Protein name: **Serpin-ZX**

**Peptide sequences:** **K.GPTLHQLLSFLNSK.S ;**

**K.SNDHLSSFFSELVSVVFVDGSASGGPR.L; R.LSFANGVWVDR.S;**

**K.EVLPEFGSVDNTR.L; R.LIFANALYFK.G; K.QFICAFDGFK.V;**

**K.RQFSMYFFLPDAK.N; R.QFSMYFFLPDAK.N; K.VGSDSGFLDHHLPQQK.V;**

**K.LDFVADHPFLFLIR.E; R.EDISGMVLFIGQVLDPSQAK.-**

PFF Mascot score: **[812]**

Sequence coverage %: **[37]**

Matched peptides No.: **[11]**

Calculated Mr: **42822**

Calculated pI: **5.94**

### Annotated PFF spectra:

Ions score is  $-10 \cdot \log(P)$ , where P is the probability that the observed match is a random event.

Individual ions scores  $> 31$  indicate identity or extensive homology ( $p < 0.05$ ).

Protein scores are derived from ions scores as a non-probabilistic basis for ranking protein hits.

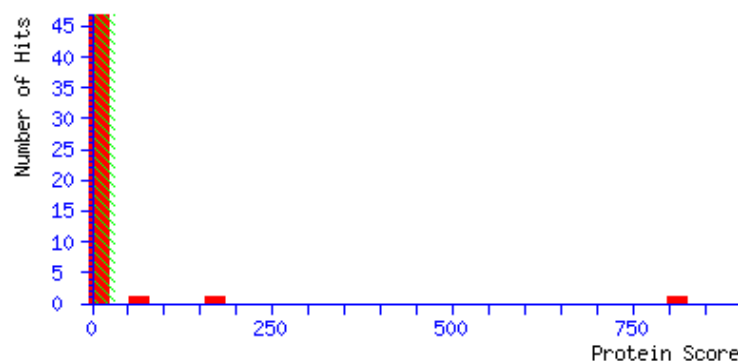

Matched peptide sequences: shown in **Bold Red**

```

1 MDLRESIVNQ NAVTLGLSKH VLLTEAKTSN SVLSPLSIQV VLGLIAAGSK
51 GPTLHQLLSF LNSKSNHDLS SFFSELVSVV FVDGSASGGP RLSFANGVWV
101 DRSLLLKPSF KQVVENVYKA ASNQVDFQNK AVEVTNEVNA WAEKETSGLI
151 KEVLPGFSVD NTTRLIFANA LYFKGAWNEK FNASTTKDYD FYLLNGSSVH
201 VSFMTSKKKQ FICAFDGFKV LGLPYKQGEA KRQFSMYFFL PDAKNGLPAL
251 VEKVGSDSGF LDHHLPPQKV EVGDFRIPRF KVSFGFEASK TLKGLGLVLP
301 FSDKGDLTEM VDSSVSQONLY VSSIFHKSFI EVNEEGTEAA AASAGVVNLE
351 SLTLADKLDF VADHPFLFLI REDISGMVLF IGQVLDPSQA K

```

Matched peptide information:

| Start - End | Observed  | Mr (expt) | Mr (calc) | ppm | Miss | Sequence                                        |
|-------------|-----------|-----------|-----------|-----|------|-------------------------------------------------|
| 51 - 64     | 1554.8429 | 1553.8356 | 1553.8566 | -13 | 0    | K.GPTLHQLLSFINSK.S (Ions score 75)              |
| 65 - 91     | 2797.5127 | 2796.3854 | 2796.3355 | -11 | 0    | K.SNDHLSFFSELVSVVFVDGSASGGPR.L (Ions score 177) |
| 92 - 102    | 1263.6348 | 1262.6275 | 1262.6408 | -10 | 0    | R.LSFANGVWDR.S (Ions score 80)                  |
| 152 - 164   | 1434.7125 | 1433.7052 | 1433.7151 | -7  | 0    | K.EVLPGFSVONTTR.L (Ions score 96)               |
| 165 - 174   | 1199.6628 | 1198.6555 | 1198.6750 | -16 | 0    | R.LIFANALYFK.G (Ions score 72)                  |
| 210 - 219   | 1232.5619 | 1231.5546 | 1231.5696 | -12 | 0    | K.QFICAFDGFK.V (Ions score 38)                  |
| 232 - 244   | 1649.6020 | 1648.7947 | 1648.8072 | -8  | 1    | K.RQFSMYFFLPDAK.N (Ions score 16)               |
| 233 - 244   | 1493.6919 | 1492.6846 | 1492.7061 | -14 | 0    | R.QFSMYFFLPDAK.N (Ions score 47)                |
| 254 - 269   | 1764.8425 | 1763.8352 | 1763.8591 | -14 | 0    | K.VGSDSGFLDHHLPPQK.V (Ions score 63)            |
| 358 - 371   | 1702.9149 | 1701.9076 | 1701.9243 | -10 | 0    | K.LDFVADHPFLFLIR.E (Ions score 72)              |
| 372 - 391   | 2147.0908 | 2146.0835 | 2146.0980 | -7  | 0    | R.EDISGMVLFIGQVLDPSQAK.- (Ions score 73)        |

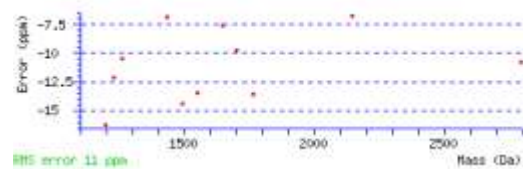



Spot No.: **12**

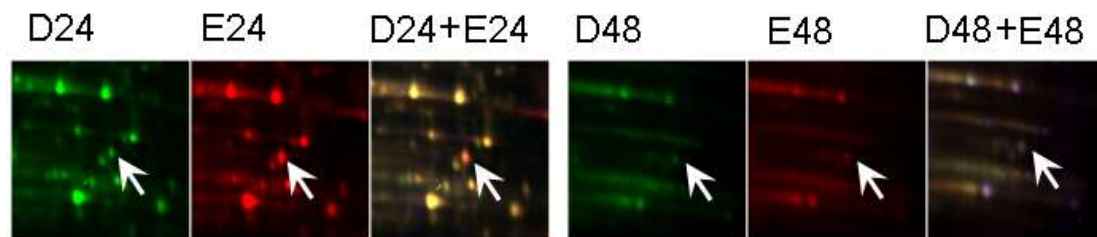

Accession No.: **scaffold1479\_76107.mRNA1**

Plant species: ***Hevea brasiliensis***

Protein name: **Acetyl-CoA acetyltransferase, cytosolic 1**

**Peptide sequences:** **M.APVAAAEIKPR.D; R.EDQDNYAIHSFER.G;**  
**K.ITGYADAAQAPELFTTAPALAIPK.A; K.VNVHGGAVSLGHPLGCSGAR.I;**  
**R.ILVTLGVLRL.Q**

PFF Mascot score: **[109]** Sequence coverage %: **[19]**

Matched peptides No.: **[5]**

Calculated Mr: **41646** Calculated pI: **6.01**

### Annotated PFF spectra:

Ions score is  $-10 \cdot \log(P)$ , where P is the probability that the observed match is a random event. Individual ions scores  $> 30$  indicate identity or extensive homology ( $p < 0.05$ ). Protein scores are derived from ions scores as a non-probabilistic basis for ranking protein hits.

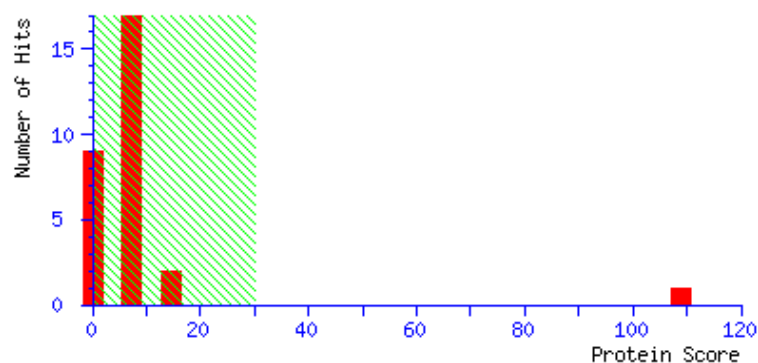

Matched peptide sequences: shown in **Bold Red**

```

1  MAPVAAAEIK PRDVCIVGVA RTPMGGFLGL LSTLPATKLG SIAIEAALKR
51 ANVDPSLVQE VFFGNVLSAN LGQAPARQAA LGAGIPNSVV CTTVNKVCAS
101 GMKATMLAAQ SIQLGINDVV VAGGMESMSN APKYLAEARK GSRLGHDSVV
151 DGMLKDGLWD VFNDVGMGSC AEICADNHSI TREDQDNYAI HSFERGIAAQ
201 DSGAFAWEIV PVEVSGGRGK PSTIVDKDEG LGKFDPVKLR KLRPSFKENG
251 GTVTAGNASS ISDGAAALVL VSGETALKLG LQVIAKITGY ADAAQAPELF
301 TTAPALAIPK AVSNAGLDAS QVDYYEINEA FAVVALANQK LLGLNPEKVN
351 VHGGAVSLGH PLGCSGARIL VTLLGVLRQK NGKYGVGGVC NGGGGASALV
401 VELL

```

Matched peptide information:

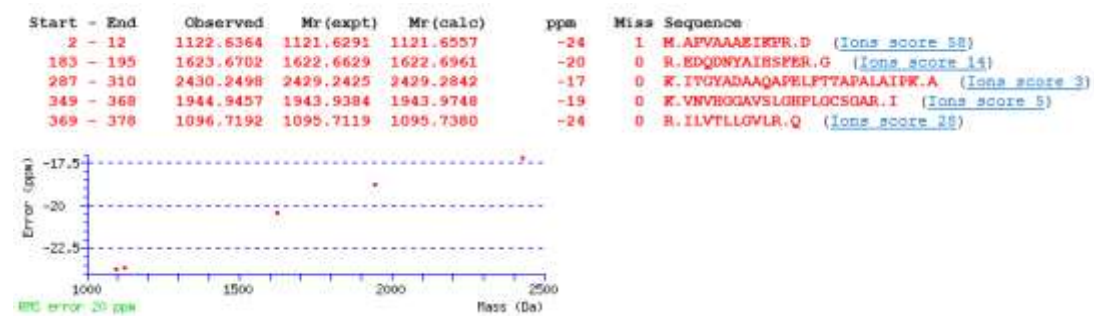

Spot No.: **13**

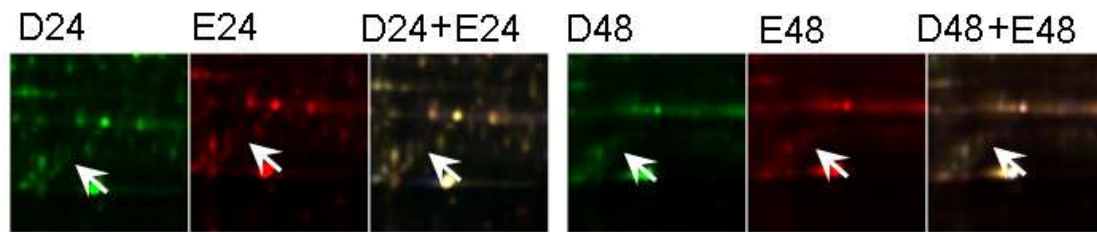

Accession No.: [scaffold0755\\_254783.mRNA1](#)

Plant species: *Hevea brasiliensis*

Protein name: **2-alkenal reductase (NADP(+)-dependent)**

**Peptide sequences:** **K.IDEVLVAFGVGR.V; R.MEGFLVGSYLNR.F;**  
**R.YSEGDIVLNPFPIAEYCVMPDSLIR.K**

PFF Mascot score: **[124]**

Sequence coverage %: **[13]**

Matched peptides No.: **[3]**

Calculated Mr: **42640**

Calculated pI: **5.95**

### Annotated PFF spectra:

Ions score is  $-10 \cdot \log(P)$ , where P is the probability that the observed match is a random event.

Individual ions scores  $> 30$  indicate identity or extensive homology ( $p < 0.05$ ).

Protein scores are derived from ions scores as a non-probabilistic basis for ranking protein hits.

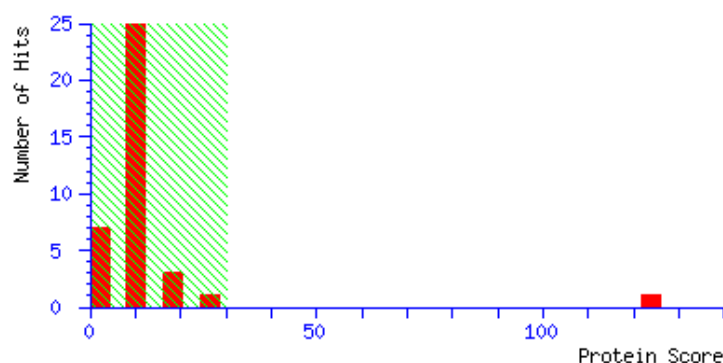

Matched peptide sequences: shown in **Bold Red**

```

1 MYFKRQSGES ISNRFYKKVC QAILTEQSTM AGDGTEKATV IEGKEWYMAA
51 YAPQGVPSDD HLKLRVTIIS LADDSIPDGH VAVELLWISV DPYLRSRMTG
101 HQDGLYMPQF KIDEVLVAFG VGRVIKSKDS RYSEGDIVLN PYFPPIAEYCV
151 MPDSDLIRKI DVTAGIAIPD YLNALGAPGF AAWVGIVVLG EAKPGLNVFV
201 SAAAGGVGMF AGQLAKLRGC RVIGSTGSDD KVKLLKEEFG YDDAFNYKRE
251 TDYDAALSKY FPNPIDVYLD NVGGKMLEAV LNHINIGGRI PLCGMISEYN
301 KSWKERDQVR NLLNLVGKNV RMEGFLVGSY LNRFDQDFLKE MEDCLLQSKI
351 ISKTKTYNGI DSFLESLSL FSSTNNGKVV IQVKE

```

## Matched peptide information:

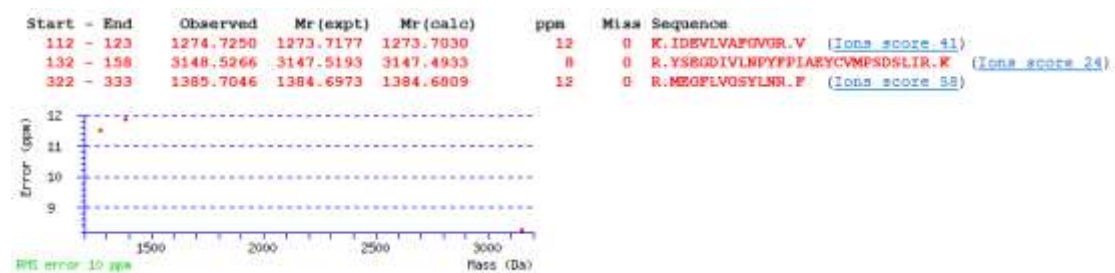

Spot No.: **14**

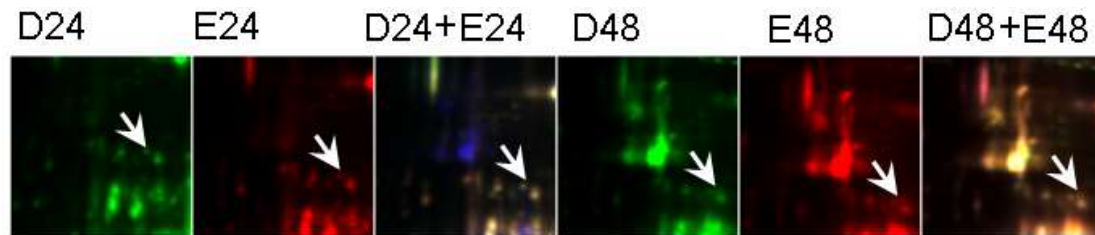

Accession No.: **scaffold0008\_570089.mRNA1**

Plant species: ***Hevea brasiliensis***

Protein name: **Proteasome subunit alpha type-1-B**

**Peptide sequences:** **R.NQYDTDVTTWSPAGR.L;**  
**R.SECINYSFTYESPLPVGR.L; R.RFENFADSSR.D; R.FENFADSSR.D**

PFF Mascot score: **[196]** Sequence coverage %: **[15]**

Matched peptides No.: **[4]**

Calculated Mr: **30852** Calculated pI: **4.76**

### Annotated PFF spectra:

Ions score is  $-10 \cdot \log(P)$ , where P is the probability that the observed match is a random event. Individual ions scores  $> 31$  indicate identity or extensive homology ( $p < 0.05$ ). Protein scores are derived from ions scores as a non-probabilistic basis for ranking protein hits.

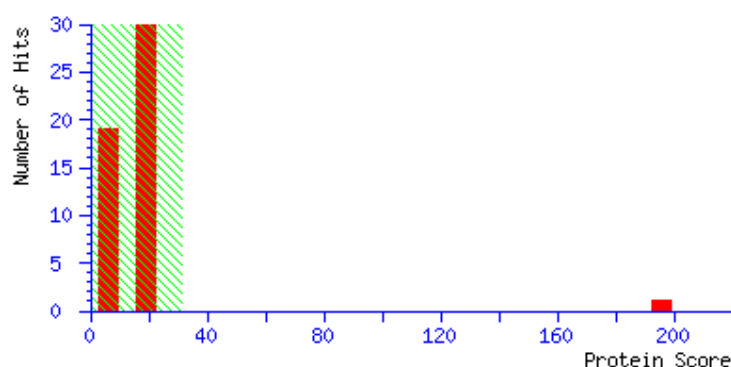

Matched peptide sequences: shown in **Bold Red**

```
1 MFRNQYDTDV TTWSPAGRLF QVEYAMEAVK QGSAAIGLRS KTHVVLACVN
51 KANSELSSHQ KKIFKVDDHI GVAIAGLTAD GRVLSRYMRS ECINYSFTYE
101 SPLPVGRLVV QLADKAQVCT QRSWKRPYGV GLLVAGLDES GAHLYNCPS
151 GNYFEYQAFV IGSRSQAQKT YLERRFENFA DSSRDDLIKD ALIAVRETQ
201 GETLKSSICT VAVVGVEAF HVLDQDTVQQ LIDAFEIVGE PEGPAAEPEP
251 EPEPEPDAAA EGTITADQGA APDQGVAPMD I
```

Matched peptide information:

| Start - End | Observed  | Mr(expt)  | Mr(calc)  | ppm | Miss | Sequence                                                           |
|-------------|-----------|-----------|-----------|-----|------|--------------------------------------------------------------------|
| 4 - 18      | 1710.7490 | 1709.7417 | 1709.7645 | -13 | 0    | R.NQYD <b>TDVTTWSPAG</b> R.L ( <a href="#">Ions score 105</a> )    |
| 90 - 107    | 2118.9480 | 2117.9407 | 2117.9728 | -15 | 0    | R.SECINYSFTYES <b>SPLPVGR</b> .L ( <a href="#">Ions score 35</a> ) |
| 175 - 184   | 1228.5477 | 1227.5404 | 1227.5632 | -19 | 1    | R.RFEN <b>FADSSR</b> .D ( <a href="#">Ions score 15</a> )          |
| 176 - 184   | 1072.4532 | 1071.4459 | 1071.4621 | -15 | 0    | R.FEN <b>FADSSR</b> .D ( <a href="#">Ions score 42</a> )           |

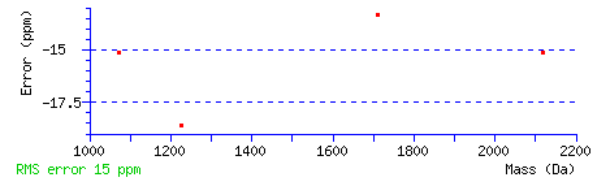

Spot No.: **15**

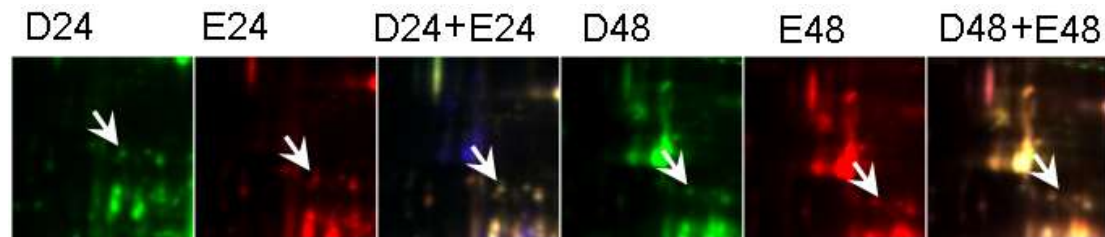

Accession No.: **scaffold0242\_1127191.mRNA1**

Plant species: ***Hevea brasiliensis***

Protein name: **Ran-binding protein 1 homolog b**

**Peptide sequences:** **K.LEEVALTTGEEDEDPILDLK.A; R.FDKEGNQWK.E;**  
**K.SCVWHAADFADGELKDELF CIR.F**

PFF Mascot score: **[223]**

Sequence coverage %: **[22]**

Matched peptides No.: **[3]**

Calculated Mr: **25725**

Calculated pI: **4.77**

### **Annotated PFF spectra:**

Ions score is  $-10 \cdot \log(P)$ , where P is the probability that the observed match is a random event.

Individual ions scores  $> 30$  indicate identity or extensive homology ( $p < 0.05$ ).

Protein scores are derived from ions scores as a non-probabilistic basis for ranking protein hits.

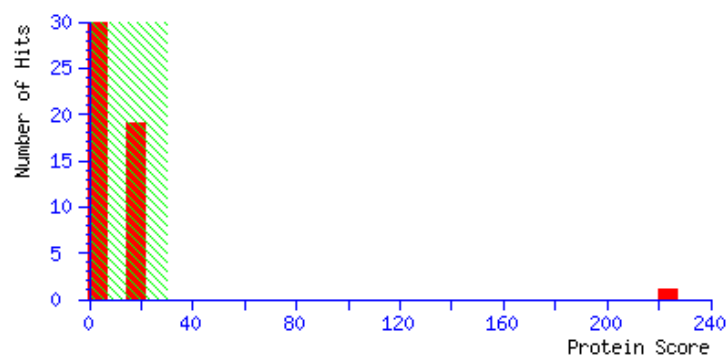



Matched peptide sequences: shown in **Bold Red**

```

1  MASTASAADP EHNTKDREED ENAPAADDED TGAQVAPIVK LEEVALTTGE
51 EDEDPIIDLK AKLYRFDKEG NQWKERGVGN VKLLKHKESG KVRLLVMRQSK
101 TLKICANHLV VPSINVQEHG GNDKSCVWHA ADFADGELKD ELFCIRFPSV
151 ENCKTFMETM QEVAETQGKK EESKEAADA GLEKLSVVD GKTDEKEKEE
201 GPVEAKEQHN EAEGEKAKAD AKKEDEIALS A

```

Matched peptide information:

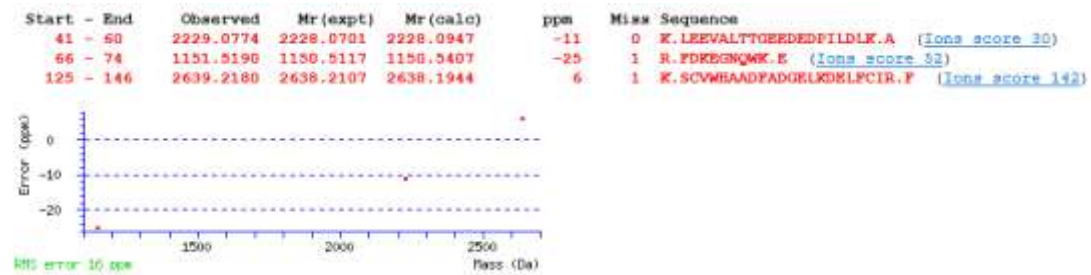

Spot No.: **16**

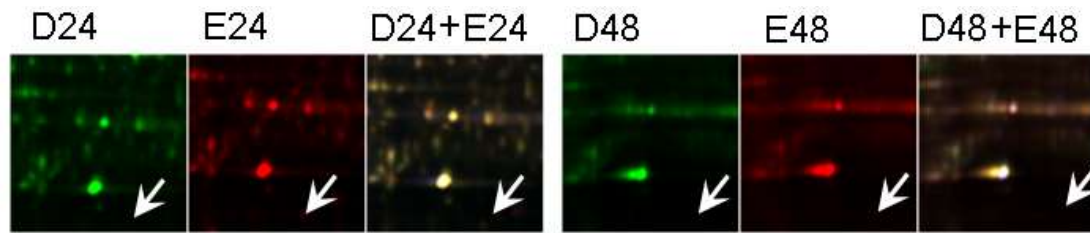

Accession No.: **scaffold0160\_1784930.mRNA1**

Plant species: ***Hevea brasiliensis***

Protein name: **Vacuolar protein sorting-associated protein 24 homolog 1**

**Peptide sequences:** **K.AQMNSISMHLGESVAIAR.T;**  
**K.VLTAIAGETAAQLPEAVR.K; R.TAEIEEEAIAEGVDDEEELEEIR.A**

PFF Mascot score: **[165]** Sequence coverage %: **[25]**

Matched peptides No.: **[3]**

Calculated Mr: **26063** Calculated pI: **5.34**

### Annotated PFF spectra:

Ions score is  $-10 \cdot \log(P)$ , where P is the probability that the observed match is a random event. Individual ions scores  $> 31$  indicate identity or extensive homology ( $p < 0.05$ ). Protein scores are derived from ions scores as a non-probabilistic basis for ranking protein hits.

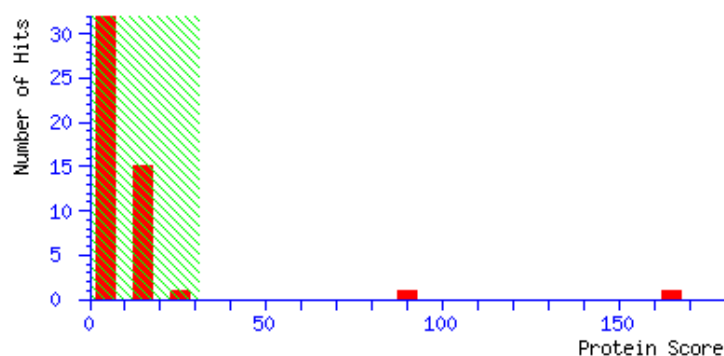

Matched peptide sequences: shown in **Bold Red**

```

1 MEKMMNMIKP KQNPOQQLRD WQRRLRQECR NIERQIRDIQ KEEKSVQKAI
51 RDAAKRNDMG SAKSLAKEIV RSRRTVNRLY ENKAQMNSIS MHLGESVAIA
101 RTVGHLSKSS EVMKLVNNLM KAPEVAATMQ EFSKEMTKAG VIEEFVNDAY
151 DNALDSEDIE EEIEEEVDKV LTAIAGETAA QLPEAVRKER VKQSAGTART
201 AEEEEAIAEG VDDEEELEEI RARLAKVRS

```

Matched peptide information:

| Start - End | Observed  | Mr(expt)  | Mr(calc)  | ppm | Miss | Sequence                                    |
|-------------|-----------|-----------|-----------|-----|------|---------------------------------------------|
| 84 - 101    | 1914.9628 | 1913.9555 | 1913.9451 | 5   | 0    | K.AQMNSISMHLGESVAIA.R.T (ions score 14)     |
| 170 - 187   | 1810.0226 | 1809.0153 | 1808.9996 | 9   | 0    | K.VLTAIAGETAAQLPEAVR.K (ions score 30)      |
| 200 - 221   | 2505.1316 | 2504.1243 | 2504.0925 | 13  | 0    | R.TAKEKKAIAEGVDDEEELEEIR.A (ions score 100) |

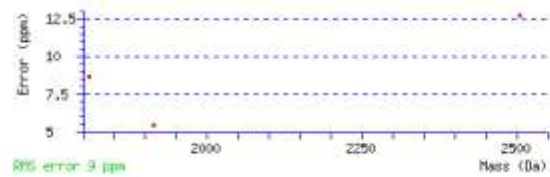

Spot No.: **17**

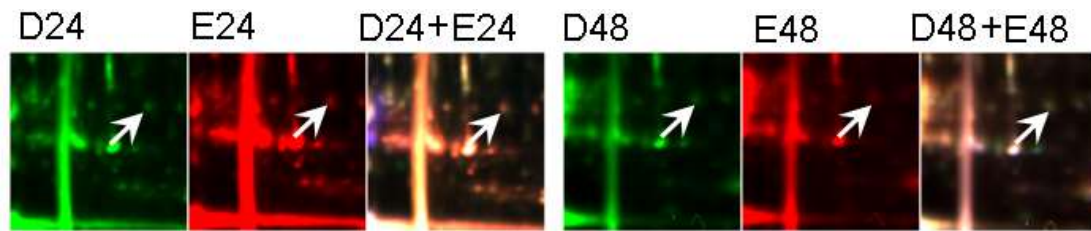

Accession No.: **scaffold0457\_538964.mRNA1**

Plant species: ***Hevea brasiliensis***

Protein name: **Alpha-soluble NSF attachment protein 2**

**Peptide sequences:** **K.HEAAQAYVDAAHCYK.K;**  
**K.KTSTNEAISCLGQAVDLFCDIGR.I; K.TSTNEAISCLGQAVDLFCDIGR.I;**  
**K.AADFFQGEEVTTSANQCK.Q; K.AIEIYEEIAR.Q; R.YQDLPTFSGTR.D**

PFF Mascot score: **[565]** Sequence coverage %: **[26]**

Matched peptides No.: **[6]**

Calculated Mr: **32767** Calculated pI: **5.05**

### **Annotated PFF spectra:**

Ions score is  $-10 \cdot \log(P)$ , where P is the probability that the observed match is a random event. Individual ions scores  $> 31$  indicate identity or extensive homology ( $p < 0.05$ ). Protein scores are derived from ions scores as a non-probabilistic basis for ranking protein hits.

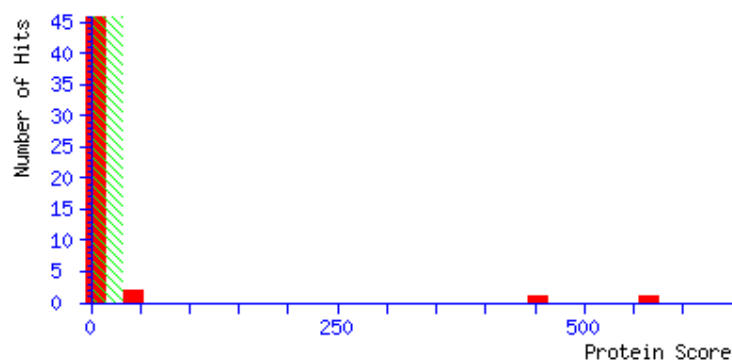

Matched peptide sequences: shown in **Bold Red**

```

1  MGDQIARGEE FEKKAEEKLN GWGLFGSKFE DAADLFDKAA NSFKLAKSWD
51 KAGSTYVKLA NCHLKLDSEH EAAQAYVDAA HCYKKTSTNE AISCLGQAVD
101 LFCDIGRISM AARYYKEIGE LYSEANFEK AIDFYEKAAD FFQGEEVTTTS
151 ANQCKQKVAQ FAAQLEQYQK AIEIYEEIAR QSLGNNLLKY GVKGHLLNAG
201 ICHLCKGDVV AITNALERYQ DLDPTFSGTR DYKLLADIAA AIDEEDIAKF
251 TDVVKEFDSM TPLDSWKTTL LLRVKEKLKA KELEEDDLT

```

Matched peptide information:

| Start - End | Observed  | Mr(expt)  | Mr(calc)  | ppm | Miss | Sequence                                   |
|-------------|-----------|-----------|-----------|-----|------|--------------------------------------------|
| 70 - 84     | 1733.6727 | 1732.6654 | 1732.7627 | -56 | 0    | K.EEAAQAYVDAAHCYK.W (Ions score 131)       |
| 85 - 107    | 2555.0713 | 2554.0640 | 2554.2156 | -59 | 1    | K.KYSTNEAISCLOQAVDLPCDGR.I (Ions score 28) |
| 86 - 107    | 2426.9995 | 2425.9922 | 2426.1206 | -53 | 0    | K.TSTNEAISCLOQAVDLPCDGR.I (Ions score 129) |
| 138 - 155   | 2002.7664 | 2001.7591 | 2001.8738 | -57 | 0    | K.AADFFQGEVTTSANQCK.Q (Ions score 113)     |
| 171 - 180   | 1206.5730 | 1205.5657 | 1205.6292 | -53 | 0    | K.AIEIYEEIAR.Q (Ions score 71)             |
| 219 - 230   | 1399.5734 | 1398.5661 | 1398.6416 | -54 | 0    | R.YQDLDPTFSGTR.D (Ions score 91)           |

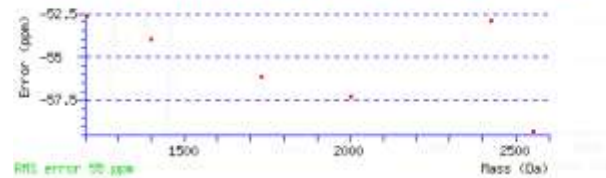

Spot No.: **18**

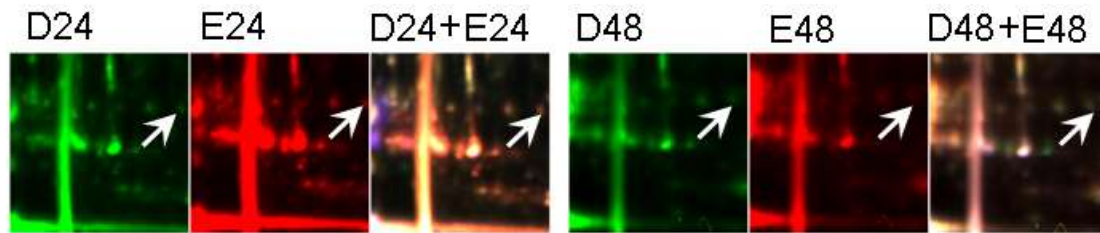

Accession No.: **scaffold0041\_2570834.mRNA1**

Plant species: ***Hevea brasiliensis***

Protein name: **Aspartic proteinase A1**

**Peptide sequences:** **K.NYMDAQYFGEIGITPPQK.F;**  
**K.CYFSVACYFHSR.Y; K.SADIHGYGTGAISGFFSQDHVK.V; K.EPVFSFWFNR.N;**  
**R.NADEDEGGEIVFGGMDPK.H; K.GEHTYVPVTQK.G**

PFF Mascot score: **[178]** Sequence coverage %: **[17]**

Matched peptides No.: **[6]**

Calculated Mr: **56526** Calculated pI: **5.73**

### Annotated PFF spectra:

Ions score is  $-10 \cdot \log(P)$ , where P is the probability that the observed match is a random event. Individual ions scores  $> 31$  indicate identity or extensive homology ( $p < 0.05$ ). Protein scores are derived from ions scores as a non-probabilistic basis for ranking protein hits.

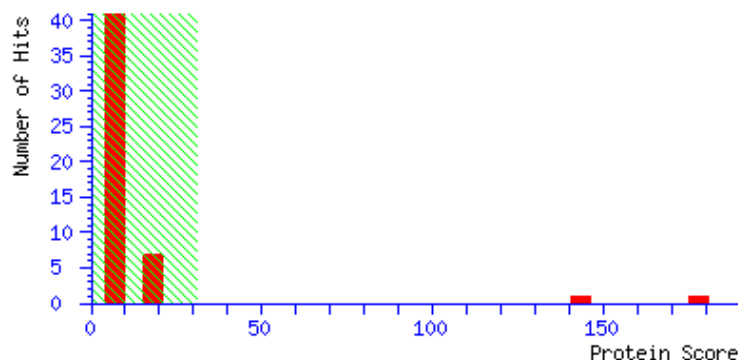

Matched peptide sequences: shown in **Bold Red**

```

1  MGTRSKPITT ALFLCFLLLP LVFAAHNDGL VRIGLKKRK F DQNNLVAAQF
51 ESKEGESLRT SFKKYHFHGN LGDAEDIDII SLKNYMDAQY FGEIGITPP
101 QKFTVIFDTG SSNLWVPSSK CYFSVACYFH SRYKSGHSST YKKNKGSADI
151 HYGTGAISGF FSQDHVKVGG LVVKDQEFIE ATKEPSITFL VAKFDGILGL
201 GFEEISVGKA VPVWYNMVNQ GLVKEPFVFSF WFNRNADEDE GGEIVFGGMD
251 PKHYKGEHTY VPVTQKGYWQ FNMGDVLIDG KTTGICGSGC AAIADSGTSL
301 LAGPTGIIAE VNHAIGATGI VSQECKAVVA QYGETIIEML LAKDQPQKIC
351 SQIGLCTFDG SRGVSVGKIS VVNIENIQGVA SGLRDAMCST CEMAVVWMQN
401 QLKLNTQER ILNYANELCE RLPSPMGESA VDCGGLSTMP NVSFTIGGKV
451 FDLSPQYVL KVGEGEAAQC ISGFTALDVP PPRGPLWILG DVFMGRFHTV
501 FDYGNKRVGF AEEA

```

Matched peptide information:

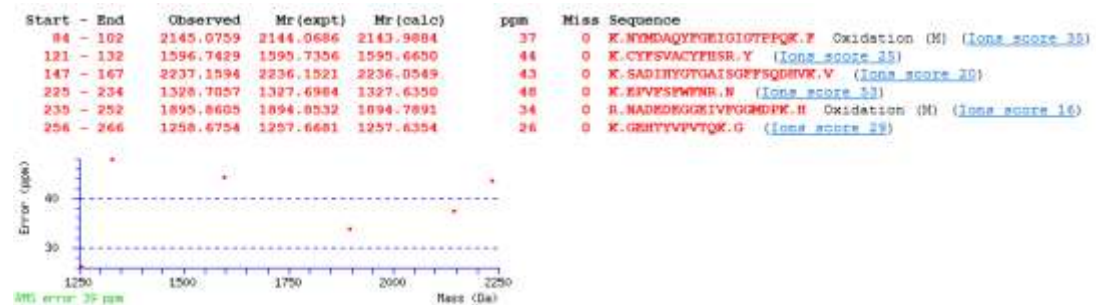



Spot No.: **19**

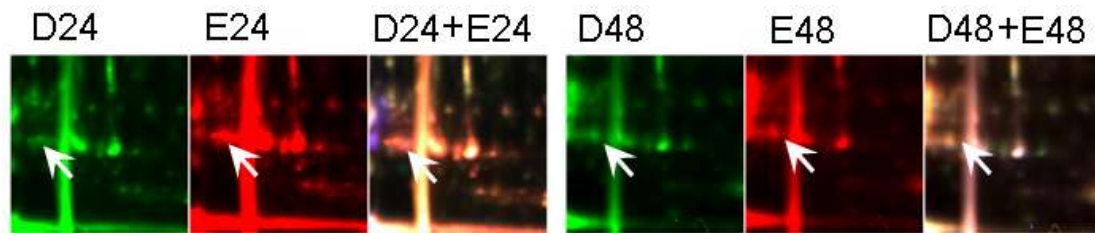

Accession No.: **scaffold0153\_1834215.mRNA1**

Plant species: ***Hevea brasiliensis***

Protein name: **26S proteasome non-ATPase regulatory subunit**

**8 homolog A**

**Peptide sequences:** **R.SLPPLFEDTPNAIHELTAR.D;**

**R.DFFQLKPYITDASGR.L; R.LPPSSQEYMILGLNLLR.L;**

**R.IAEFHTELELLSPTALENPCIK.H; K.EIPSLQLINQTLSYAR.E**

PFF Mascot score: **[525]**

Sequence coverage %: **[33]**

Matched peptides No.: **[5]**

Calculated Mr: **30835**

Calculated pI: **4.87**

**Annotated PFF spectra:**

Ions score is  $-10 \cdot \log(P)$ , where P is the probability that the observed match is a random event.

Individual ions scores  $> 31$  indicate identity or extensive homology ( $p < 0.05$ ).

Protein scores are derived from ions scores as a non-probabilistic basis for ranking protein hits.

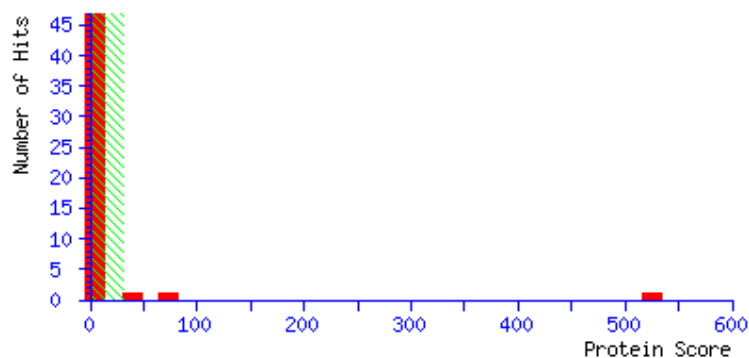

Matched peptide sequences: shown in **Bold Red**

```

1  MDPKLTIEVSQ LFERFKAACV REDVDIGSNL LSKLKVMLTG FRSLPPLFED
51 TPNAIHELTL ARDIYEHAVL LSVKIGDQDA FERDFFQLKP YYTDASGRLP
101 PSSQEYMILG LNLRLLVQN RIAEFHTELE LLSPTALENP CIKHAVELEQ
151 SFMEGAYNRV LSAKQTVPYK TYDYFMDLLA KTVRDEIAGC SEKAYDYLSI
201 SDARQMLLFS SDDELLQYIN EEHPEWEIKN GVVIFQKAKE SAPCKEIPSL
251 QLINQTLSYA RELERIV

```

Matched peptide information:

| Start - End | Observed  | Mr(expt)  | Mr(calc)  | ppm | Miss Sequence                               |
|-------------|-----------|-----------|-----------|-----|---------------------------------------------|
| 43 - 62     | 2234.1008 | 2233.0935 | 2233.1743 | -36 | 0 R.SLPPLFEDTPNAIHELTLAR.D (Ions score 106) |
| 84 - 98     | 1807.8010 | 1806.7937 | 1806.8577 | -35 | 1 R.DFFQLKPYTDSGR.L (Ions score 117)        |
| 99 - 115    | 1943.9922 | 1942.9849 | 1943.0550 | -36 | 0 R.LPSSQEYMILGLNLR.L (Ions score 104)      |
| 122 - 143   | 2525.2039 | 2524.1966 | 2524.2883 | -36 | 0 R.IAEFHTELELLSPTALENPCK.H (Ions score 67) |
| 246 - 261   | 1845.9424 | 1844.9351 | 1844.9996 | -35 | 0 K.EIPSLQLINQTLRYAR.E (Ions score 130)     |

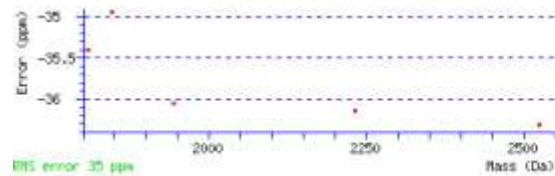

Spot No.: **20**

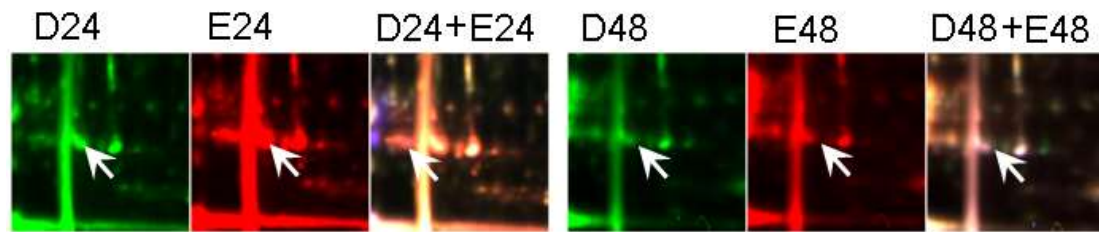

Accession No.: **scaffold1222\_175215.mRNA1**

Plant species: ***Hevea brasiliensis***

Protein name: **Rubber elongation factor protein**

**Peptide sequences:** **K.SVVRPFYYR.F; K.FADNQVDASVTLVLR.Y;**  
**R.AALALVSYLPLPTNR.L**

PFF Mascot score: **[274]**

Sequence coverage %: **[17]**

Matched peptides No.: **[3]**

Calculated Mr: **23621**

Calculated pI: **5.33**

### **Annotated PFF spectra:**

Ions score is  $-10 \cdot \log(P)$ , where P is the probability that the observed match is a random event.

Individual ions scores  $> 31$  indicate identity or extensive homology ( $p < 0.05$ ).

Protein scores are derived from ions scores as a non-probabilistic basis for ranking protein hits.

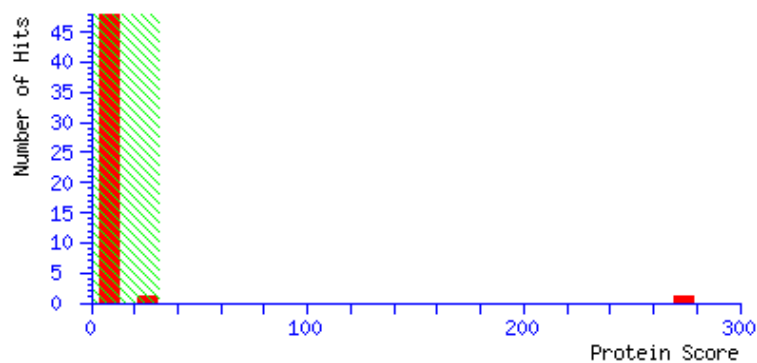

Matched peptide sequences: shown in **Bold Red**

```
1 MASLLGAASN VINAASNVVE EAVKGVGNAQ QEVANAVSNP SNIVKDVASA
51 ATDIVEEAAK VVDNVQGGVV SAASNVVEEA AKGVGNIQEK VDDEEEDTLK
101 YLDIVQAALV LALVSSSKLY LFKDKSGPL KPGVDIAEVT IKSVVRPFYY
151 RFHDVPNKVL KPADNQVDAS VTLVLRYAPP VVKQVSTRAY SVARNAPRAA
201 LALVSYLPLP TNRLCKLLSE DK
```

Matched peptide information:

| Start - End | Observed  | Mr(expt)  | Mr(calc)  | ppm | Miss | Sequence                                                      |
|-------------|-----------|-----------|-----------|-----|------|---------------------------------------------------------------|
| 143 - 151   | 1186.5686 | 1185.5613 | 1185.6295 | -57 | 1    | <b>K.SVVRPFYYR.F</b> ( <a href="#">Ions score 38</a> )        |
| 162 - 176   | 1647.7781 | 1646.7708 | 1646.8628 | -56 | 0    | <b>K.PADNQVDASVTLVLR.Y</b> ( <a href="#">Ions score 130</a> ) |
| 199 - 213   | 1598.8372 | 1597.8299 | 1597.9191 | -56 | 0    | <b>R.AALALVSYLPLPTNR.L</b> ( <a href="#">Ions score 106</a> ) |

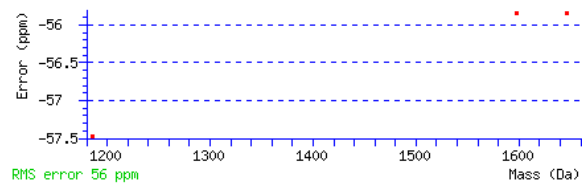

Spot No.: **21**

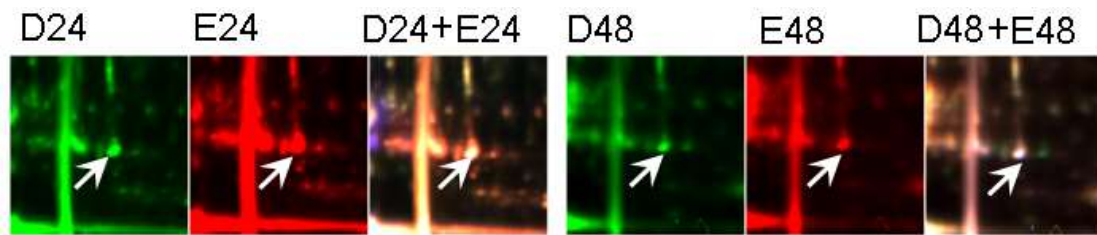

Accession No.: **scaffold1222\_175215.mRNA1**

Plant species: ***Hevea brasiliensis***

Protein name: **Rubber elongation factor protein**

**Peptide sequences:** **K.VVDNVQQGVVSAASNVVEEAAK.G;**

**K.YLDIVQAALVLALVSSSK.L; K.SVVRPFYYR.F; K.FADNQVDASVTLVLR.Y;**  
**R.AALALVSYLPLPTNR.L**

PFF Mascot score: **[524]**

Sequence coverage %: **[35]**

Matched peptides No.: **[5]**

Calculated Mr: **23621**

Calculated pI: **5.33**

### **Annotated PFF spectra:**

Ions score is  $-10 \cdot \log(P)$ , where P is the probability that the observed match is a random event.  
Individual ions scores  $> 31$  indicate identity or extensive homology ( $p < 0.05$ ).  
Protein scores are derived from ions scores as a non-probabilistic basis for ranking protein hits.

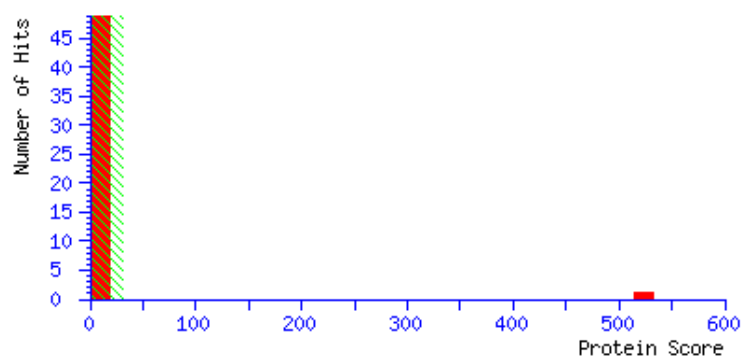

Matched peptide sequences: shown in **Bold Red**

```

1  MASLLGAASN VINAASNVEE EAVKGVGNAQ QEVANAVSNP SNIVKDVASA
51 ATDIVEEAAK VVDNVQQGVV SAASNVEEA AKGVGNIQEK VDDEEEDTLK
101 YLDIVQAALV LALVSSSKLY LFKVDKSGPL KPGVDIAEVI IKSVVRPFYY
151 RFHDVFNKVL KFADNQVDAS VTLVLRYAPP VVKQVSTRAY SVARNAPRAA
201 LALVSYLPLP TNRLCKLLSE DK

```

Matched peptide information:

| Start - End | Observed  | Mr (expt) | Mr (calc) | ppm | Miss Sequence                                         |
|-------------|-----------|-----------|-----------|-----|-------------------------------------------------------|
| 61 - 82     | 2212.9980 | 2211.9907 | 2212.1335 | -65 | 0 K.VVDNVQQGVVSAASNVEEA <b>AK</b> .G (ions score 161) |
| 101 - 118   | 1889.9652 | 1888.9579 | 1889.0873 | -69 | 0 K.YLDIVQAALV <b>LALVSSSK</b> .L (ions score 66)     |
| 143 - 151   | 1186.5707 | 1185.5634 | 1185.6295 | -56 | 1 K.SVVRPFYYR.F (ions score 39)                       |
| 162 - 176   | 1647.7740 | 1646.7667 | 1646.8628 | -58 | 0 K.FADNQVDASVTLVLR.Y (ions score 180)                |
| 199 - 213   | 1598.8350 | 1597.8277 | 1597.9191 | -57 | 0 R.AALALVSYLPLPTNR.L (ions score 109)                |

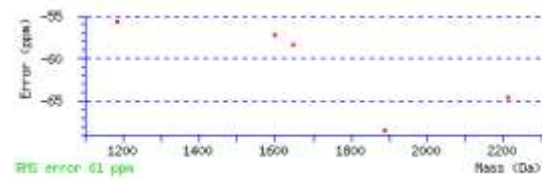

Spot No.: **22**

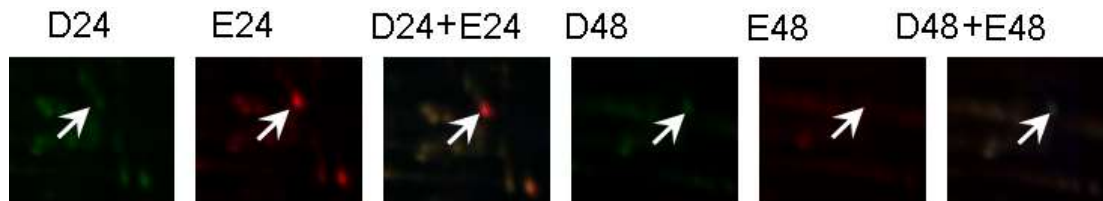

Accession No.: [scaffold2538\\_3915.mRNA1](#)

Plant species: *Hevea brasiliensis*

Protein name: [REF/SRPP-like protein At3g05500](#)

**Peptide sequences:** [K.AGPLKPGVETVEGTVK.S](#); [K.AEQCAVTAWR.R](#);  
[R.RLNQLPLFPQVAQVVVPTAAYCSEK.Y](#); [R.VSSYLPLVPTER.I](#)

PFF Mascot score: [\[267\]](#)      Sequence coverage %: [\[25\]](#)

Matched peptides No.: [\[4\]](#)

Calculated Mr: [27100](#)

Calculated pI: [6.36](#)

### Annotated PFF spectra:

Ions score is  $-10 \cdot \log(P)$ , where P is the probability that the observed match is a random event.

Individual ions scores  $> 31$  indicate identity or extensive homology ( $p < 0.05$ ).

Protein scores are derived from ions scores as a non-probabilistic basis for ranking protein hits.

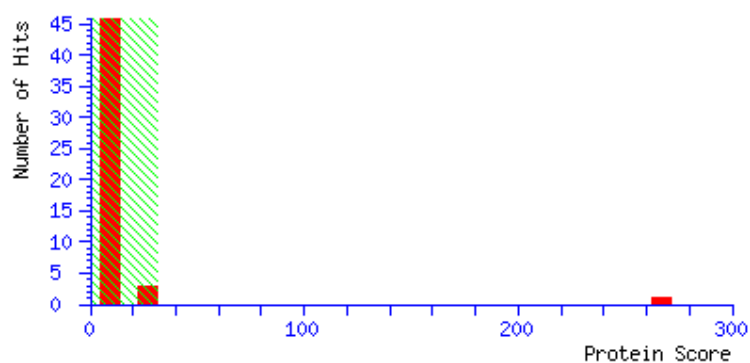



Matched peptide sequences: shown in **Bold Red**

```

1 MAEGEGNVNM QQQMENEEEE RLKYLEFVQV AVIHAVVTFT NLYLYAKEKA
51 GPLKPGVETV EGTVKSVVGP VYYKFHDVPN EVLKFDVRKV DESVTSLSR
101 VPPVVKQVSA QAYSVAREAP VAARAVASEV HQSGVKETAS GLAKTLYTKY
151 EPKAKELYSK YEPKAEQCAV TAWRRLNQLP LFPQVAQVVV PTAAYCSEKY
201 NQTVLSTFEK GYRVSSYLPL VPTERIAKVF SDDVAQSMPL VSS

```

Matched peptide information:

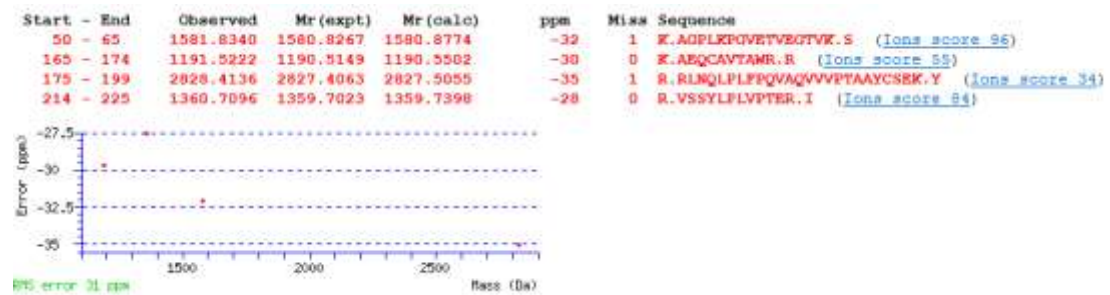

Spot No.: **23**

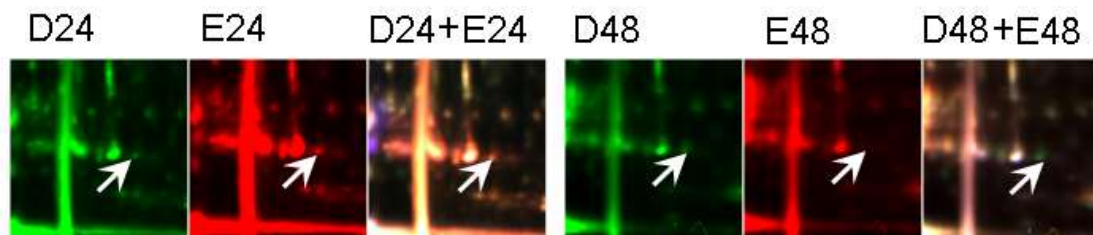

Accession No.: **scaffold1222\_175215.mRNA1**

Plant species: ***Hevea brasiliensis***

Protein name: **Rubber elongation factor protein**

**Peptide sequences:** **K.DVSAATDIVEEAAK.V; R.AALALVSYLPLPTNR.L; K.VVDNVQQGVVSAASNVVEEAAK.G; K.SVVRPFYYR.F; K.FADNQVDASVTLVLR.Y;**

PFF Mascot score: **[483]** Sequence coverage %: **[34]**

Matched peptides No.: **[5]**

Calculated Mr: **23621**

Calculated pI: **5.33**

### Annotated PFF spectra:

Ions score is  $-10 \cdot \log(P)$ , where P is the probability that the observed match is a random event.

Individual ions scores  $> 31$  indicate identity or extensive homology ( $p < 0.05$ ).

Protein scores are derived from ions scores as a non-probabilistic basis for ranking protein hits.

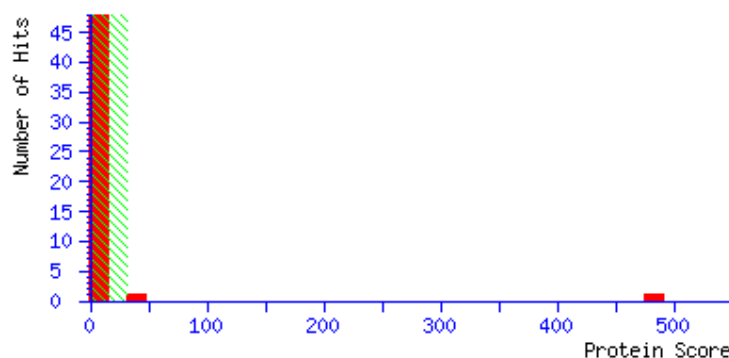

Matched peptide sequences: shown in **Bold Red**

```

1 MASLLGAASN VINAASNVVE EAVKGVGNAQ QEVANAVSNP SNIVKDVASA
51 ATDIVEEAAK VVDNVQQGVV SAASNVVEEA AKGVGNIQEK VDDEEDTLK
101 YLDIVQAALV LALVSSSKLY LFVKDKSGPL KPGVDTA EVT IKSVVRPFYY
151 RFHDVPNKVL KFADNQVDAS VTLVLRYAPP VVKQVSTRAY SVARNAPRAA
201 LALVSYLPLP TNRLCKLLSE DK

```

Matched peptide information:

| Start - End | Observed  | Mr(expt)  | Mr(calc)  | ppm | Miss | Sequence                                    |
|-------------|-----------|-----------|-----------|-----|------|---------------------------------------------|
| 46 - 60     | 1489.6531 | 1488.6458 | 1488.7307 | -57 | 0    | K.DVSAATDIVEEAAK.V (ions score 88)          |
| 61 - 82     | 2212.9885 | 2211.9812 | 2212.1335 | -69 | 0    | K.VVDNVQQGVVSAASNVVEEAAK.G (ions score 119) |
| 143 - 151   | 1106.5667 | 1105.5594 | 1105.6255 | -59 | 1    | K.SVVRPFYYR.F (ions score 35)               |
| 162 - 176   | 1647.7722 | 1646.7649 | 1646.8628 | -59 | 0    | K.FADNQVDASVTLVLR.Y (ions score 137)        |
| 199 - 213   | 1598.8346 | 1597.8273 | 1597.9191 | -57 | 0    | R.AALALVSYLPLPTNR.L (ions score 104)        |

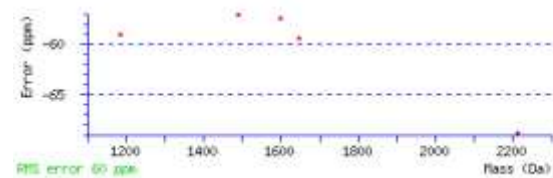

Spot No.: **24**

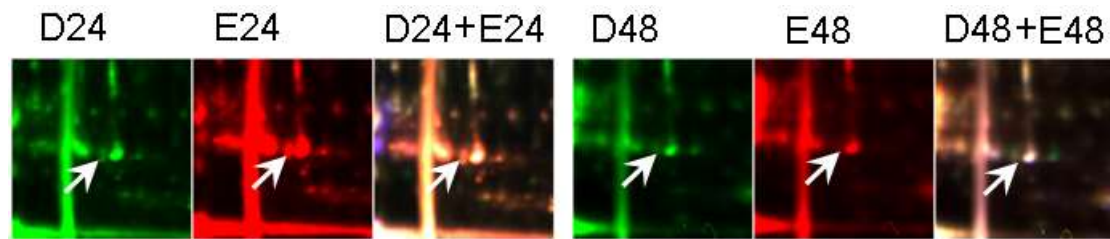

Accession No.: **scaffold1222\_175215.mRNA1**

Plant species: ***Hevea brasiliensis***

Protein name: **Rubber elongation factor protein**

**Peptide sequences:** **K.SVVRPFYYR.F; K.FADNQVDASVTLVLR.Y;**  
**R.AALALVSYLPLPTNR.L**

PFF Mascot score: **[277]**

Sequence coverage %: **[17]**

Matched peptides No.: **[3]**

Calculated Mr: **23621**

Calculated *pI*: **5.33**

### Annotated PFF spectra:

Ions score is  $-10 \cdot \log(P)$ , where  $P$  is the probability that the observed match is a random event.

Individual ions scores  $> 31$  indicate identity or extensive homology ( $p < 0.05$ ).

Protein scores are derived from ions scores as a non-probabilistic basis for ranking protein hits.

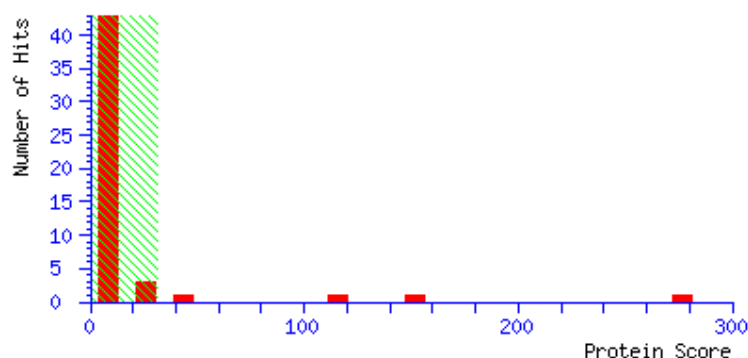

Matched peptide sequences: shown in **Bold Red**

```
1 MASLLGAASN VINAASNVVE EAVKGVGNAQ QEVANAVSNP SNIVKDVASA
51 ATDIVEEAAK VVDNVQQGVV SAASNVVEEA AKGVGNIQEK VDDEEEDTLK
101 YLDIVQAALV LALVSSSKLY LFVKDKSGPL KPGVDTA EVT IKSVVRPFYY
151 RFHDVPNKVL KFADNQVDAS VTLVLR YAPP VVKQVSTRAY SVARNAPRAA
201 LALVSYLPLP TNRLCKLLSE DK
```

Matched peptide information:

| Start - End | Observed  | Mr(expt)  | Mr(calc)  | ppm | Miss | Sequence                                                       |
|-------------|-----------|-----------|-----------|-----|------|----------------------------------------------------------------|
| 143 - 151   | 1186.5507 | 1185.5434 | 1185.6295 | -73 | 1    | <b>K.SVVRPFYYR.F</b> ( <a href="#">Ions score 42</a> )         |
| 162 - 176   | 1647.7527 | 1646.7454 | 1646.8628 | -71 | 0    | <b>K.FADNQVDASVT</b> LVLR.Y ( <a href="#">Ions score 142</a> ) |
| 199 - 213   | 1598.8119 | 1597.8046 | 1597.9191 | -72 | 0    | <b>R.AALVSYLPLPTNR.L</b> ( <a href="#">Ions score 93</a> )     |

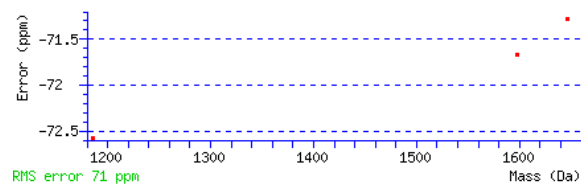

Spot No.: **25**

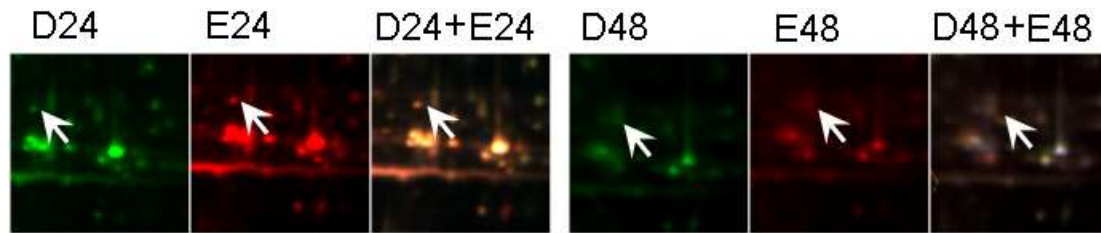

Accession No.: **scaffold0086\_1407649.mRNA1**

Plant species: ***Hevea brasiliensis***

Protein name: **Glutathione S-transferase L3**

**Peptide sequences:** **K.IHLVPLNLQSR.P; K.YLDSNFEGQSLLPDDPAK.K;**  
**K.YLDSNFEGQSLLPDDPAK.E; K.EFAEELFSYTDTFNK.T;**  
**K.EAGPAFDYLENALHK.F; K.FDDGPFLLGQFSLVDIAYIPFVER.F;**  
**R.FQIFLSEVFK.Y; K.YDITAGRPK.L; K.LAAWIEEINK.L**

PFF Mascot score: **[426]**

Sequence coverage %: **[24]**

Matched peptides No.: **[9]**

Calculated Mr: **53345**

Calculated pI: **5.95**

### Annotated PFF spectra:

Ions score is  $-10 \cdot \log(P)$ , where P is the probability that the observed match is a random event.

Individual ions scores  $> 31$  indicate identity or extensive homology ( $p < 0.05$ ).

Protein scores are derived from ions scores as a non-probabilistic basis for ranking protein hits.

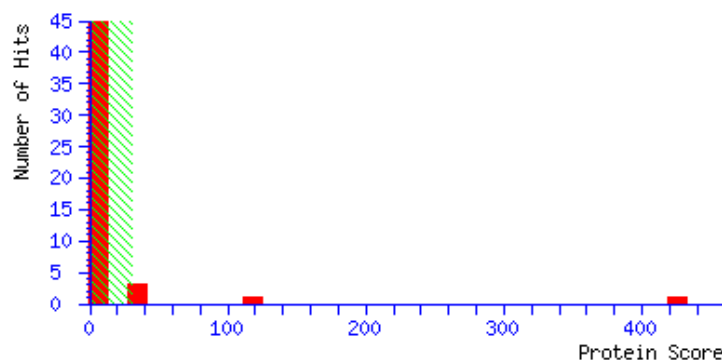

Matched peptide sequences: shown in **Bold Red**

```

1 MAELQGLQDK IHLVPLNLQS RPSWYGEKVY SVNRPVALEH NGKIIGESLD
51 LIKYLDNFE QSLLPDDPA KKEFAEELFS YTDTFNKTVSF TSFKGDVAKE
101 AGPAFDYLEN ALHKFDDGPF LLQFSLVDI AYIPFVERFQ IFLSEVFKYD
151 ITAGRPKLAA WIEEINKLGA YKQTKTDPKE LVEFYKKRIL GHLDKSVPEK
201 LPPVLDPTAE QPPLFDGTIR LYIAYICPYA QRVWIIRNYK GLQDKIKLIP
251 LNLQSRPAWY GEKVYPPNKV PSLEHNGKII GESLDLIKYL DSNFEGQSLL
301 PEDPAKREFA EELLAYSDTF NKIVFTSFKG DPAKEAGPAF DYLENALHKF
351 DDGPFLLGQF SLVDIAYIPF VERFHVFLLE VFKYDIIAGR PKLEAWIEEI
401 NKIEAYKQTK IDPKENVEAF KKRFLAIQYR RMGCALIRRK LRQCFIGLDP
451 QLCQRFVSW V

```

Matched peptide information:

| Start - End | Observed  | Mr(expt)  | Mr(calc)  | ppm | Miss Sequence                                  |
|-------------|-----------|-----------|-----------|-----|------------------------------------------------|
| 11 - 21     | 1289.8518 | 1288.8443 | 1288.7615 | 64  | 0 K.IHLVPLNLQSR.F (Ions score 51)              |
| 54 - 71     | 2009.0750 | 2008.0677 | 2007.9425 | 62  | 0 K.YLDSNFEQSLLPDDPAK.K (Ions score 43)        |
| 54 - 72     | 2137.1724 | 2136.1651 | 2136.0375 | 60  | 1 K.YLDSNFEQSLLPDDPAKK.E (Ions score 70)       |
| 73 - 87     | 1040.9390 | 1039.9317 | 1039.8203 | 61  | 0 K.EFAEELFSYTDTFNK.T (Ions score 80)          |
| 100 - 114   | 1674.9232 | 1673.9159 | 1673.8049 | 66  | 0 K.EAGPAFDYLENALHK.F (Ions score 85)          |
| 115 - 138   | 2758.5637 | 2757.5564 | 2757.4054 | 55  | 0 K.FDDGPFLLGQFSLVDIAYIPFVER.F (Ions score 48) |
| 139 - 148   | 1257.7480 | 1256.7407 | 1256.6805 | 48  | 0 R.FQIFLSEVFK.Y (Ions score 29)               |
| 149 - 157   | 1020.6074 | 1019.6001 | 1019.5400 | 59  | 1 K.YDITAGRPK.L (Ions score 7)                 |
| 158 - 167   | 1186.7015 | 1185.6942 | 1185.6393 | 46  | 0 K.LAAMIEEINK.L (Ions score 18)               |

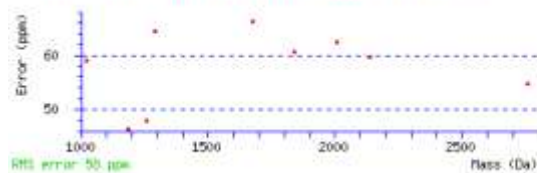



Spot No.: **26**

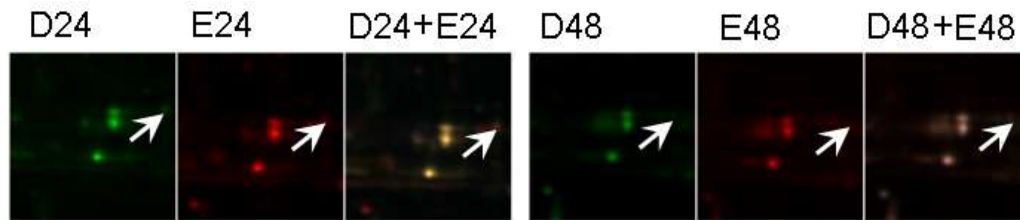

Accession No.: **scaffold0181\_54255.mRNA1**

Plant species: ***Hevea brasiliensis***

Protein name: **Proteasome subunit alpha type-3**

**Peptide sequences:** **R.HSGMAVAGLAADGR.Q;**

**K.SEATNYESVYGEPIPVNELAGR.V; R.DGPQLYMIEPSGISYR.Y;**

**K.AFELEMSWVCDESKR.L**

PFF Mascot score: **[412]**

Sequence coverage %: **[26]**

Matched peptides No.: **[4]**

Calculated Mr: **27595**

Calculated pI: **6.11**

### **Annotated PFF spectra:**

Ions score is  $-10 \cdot \log(P)$ , where P is the probability that the observed match is a random event.

Individual ions scores  $> 31$  indicate identity or extensive homology ( $p < 0.05$ ).

Protein scores are derived from ions scores as a non-probabilistic basis for ranking protein hits.

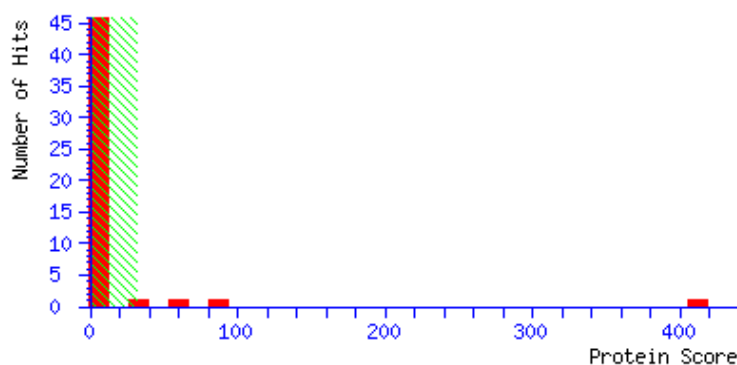

Matched peptide sequences: shown in **Bold Red**

```

1  MSSIGTGYDL SVTTFSPDGR VFQIEYAAGA VDNSGTVIGI KCKDGIVMGV
51 EKLIASKMML PGSNRRHSV HRHSGMAVAG LAADGRQIVA RAKSEATNYE
101 SVYGEPIPVN ELAGRVASYV HLCTLYWWLR PFGCGVILGG YDRDGPQLYM
151 IEPSGISYR FGAAIGKGKQ AAKTEIEKLK LSEMTCREGV IEVAKIIYKV
201 HDEAKDKAFE LEMSWCDES KRLHQKVPDE LLEEAKAAAR TALEEMDAD

```

Matched peptide information:

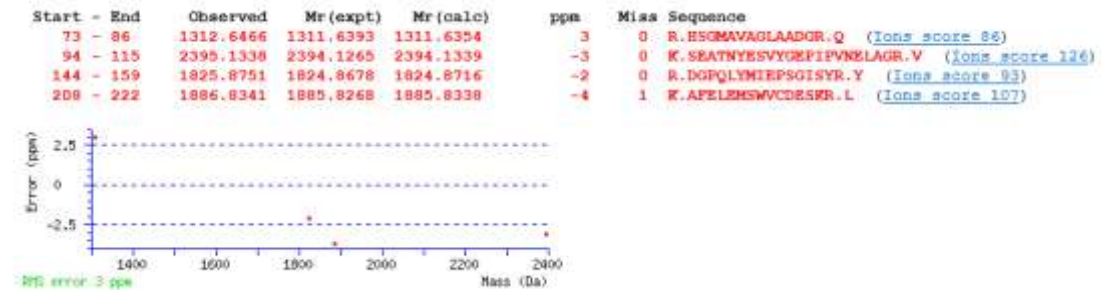

Spot No.: **27**

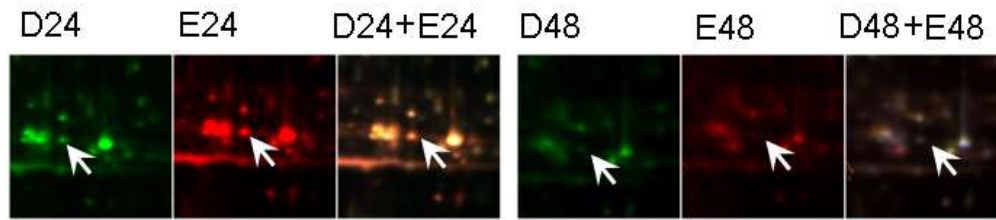

Accession No.: **scaffold1222\_175215.mRNA1**

Plant species: ***Hevea brasiliensis***

Protein name: **Rubber elongation factor protein**

**Peptide sequences:** **K.GVGNAQQEVANAVSNPSNIVK.D;**  
**K.VVDNVQQGVVSAASNVVEEAAK.G; K.SVVRPFYYR.F; K.FADNQVDASVTLVLR.Y;**  
**R.AALALVSYLPLPTNR.L**

PFF Mascot score: **[467]** Sequence coverage %: **[36]**

Matched peptides No.: **[5]**

Calculated Mr: **23621** Calculated pI: **5.33**

### Annotated PFF spectra:

Ions score is  $-10 \cdot \log(P)$ , where P is the probability that the observed match is a random event. Individual ions scores  $> 30$  indicate identity or extensive homology ( $p < 0.05$ ). Protein scores are derived from ions scores as a non-probabilistic basis for ranking protein hits.

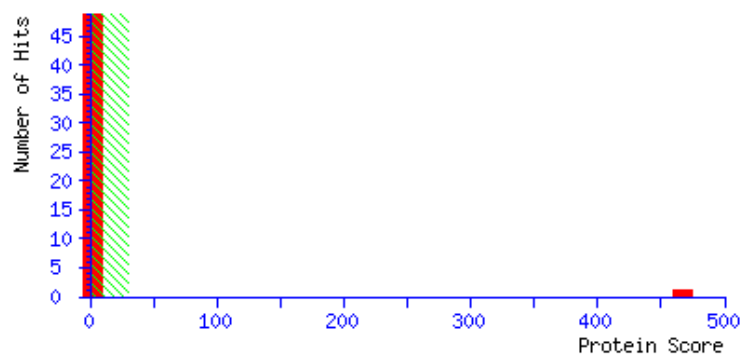

Matched peptide sequences: shown in **Bold Red**

```

1  MASLLGAASN VINAASNVVE EAVKGVGNAQ QEVANAVSNP SNIVKDVASA
51 ATDIVEEAAK VVDNVQQGVV SAASNVVEEA AKGVGNIQEK VDDEEEDILK
101 YLDIVQAAALV LALVSSSKLY LFKDKSGPL KPGVDIAEVI IKSVVRPFYY
151 RFHDVPNKVL KFADNQVDAS VTLVLRYAPP VVKQVSTRAY SVARNAPRAA
201 LALVSYLPLP TNRLCKLLSE DK

```

Matched peptide information:

| Start - End | Observed  | Mr (expt) | Mr (calc) | ppm | Miss | Sequence                                                     |
|-------------|-----------|-----------|-----------|-----|------|--------------------------------------------------------------|
| 25 - 45     | 2096.0068 | 2094.9995 | 2095.0658 | -32 | 0    | K.GVGNAGQEVANAVSNPSNIVK.D ( <a href="#">Ions score 78</a> )  |
| 61 - 82     | 2213.0596 | 2212.0523 | 2212.1335 | -37 | 0    | K.VVDNVQQGVVSAASNVVEEAAR.D ( <a href="#">Ions score 95</a> ) |
| 143 - 151   | 1186.5925 | 1185.5852 | 1185.6295 | -37 | 1    | K.SVVRPFYYR.F ( <a href="#">Ions score 36</a> )              |
| 162 - 176   | 1647.8125 | 1646.8052 | 1646.8628 | -35 | 0    | K.FADNQVDASVTLVLR.Y ( <a href="#">Ions score 153</a> )       |
| 199 - 213   | 1598.8693 | 1597.8620 | 1597.9191 | -36 | 0    | H.AALALVSYLPLPTNR.L ( <a href="#">Ions score 106</a> )       |

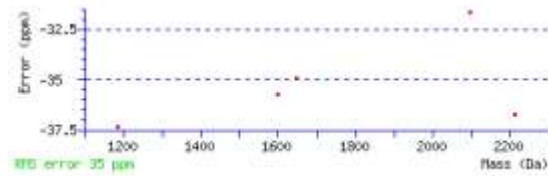

Spot No.: **28**

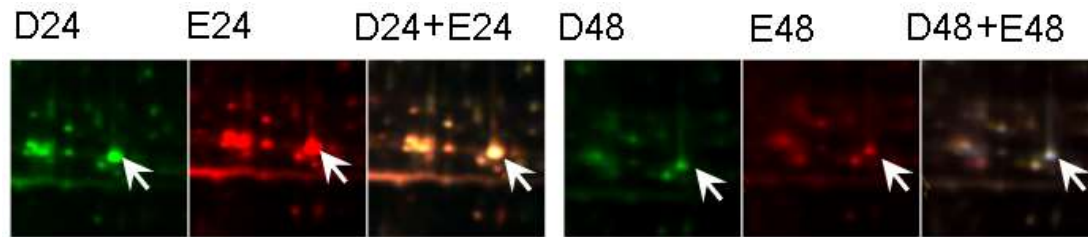

Accession No.: [scaffold0135\\_1578719.mRNA1](#)

Plant species: *Hevea brasiliensis*

Protein name: **Probable glutathione S-transferase**

**Peptide sequences:** **K.YEYREEDLR.N; K.SPLLLQMNPVHK.K;**  
**R.FWADFIDK.K; R.FWADFIDKK.I; K.VYEFVLVLK.K**

PFF Mascot score: [\[192\]](#) Sequence coverage %: [\[17\]](#)

Matched peptides No.: [\[5\]](#)

Calculated Mr: **25563**

Calculated *pI*: **6.23**

### Annotated PFF spectra:

Ions score is  $-10 \cdot \log(P)$ , where  $P$  is the probability that the observed match is a random event.

Individual ions scores  $> 31$  indicate identity or extensive homology ( $p < 0.05$ ).

Protein scores are derived from ions scores as a non-probabilistic basis for ranking protein hits.

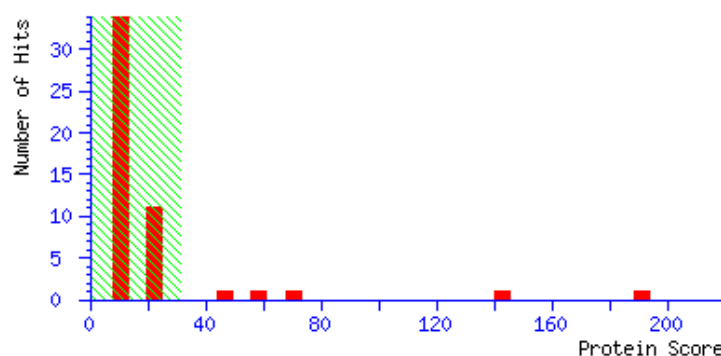

Matched peptide sequences: shown in **Bold Red**

```

1 MAEEVILLDF WSSPFGMRVR IALAEKGVKY EYREEDLRNK SPLLLQMNPFV
51 HKKIPVLIHN GKPICESLIA VQYVDEVWKD KSPLLPSDPY QRAQARFWAD
101 FIDKKIYDIG RKIWTITKGDE QEAAKKEFIE ALKLLEGELG NKPYFGGESM
151 GYVDVALIPF YSWFYAYETC GNFSIEPECP VLIAWAKRCL QKESVSKSLP
201 DPQKVYEFVL VLKKKFGIE

```

Matched peptide information:

| Start - End | Observed  | Mr(expt)  | Mr(calc)  | ppm | Miss | Sequence                                        |
|-------------|-----------|-----------|-----------|-----|------|-------------------------------------------------|
| 30 - 38     | 1272.6660 | 1271.6592 | 1271.5782 | 64  | 1    | K.YEYREEDLR.N (Ions score 48)                   |
| 41 - 52     | 1392.0492 | 1391.8419 | 1391.7595 | 59  | 0    | K.SPLLLQMNPFVHK.K Oxidation (M) (Ions score 47) |
| 97 - 104    | 1041.5602 | 1040.5529 | 1040.4967 | 54  | 0    | R.FWADPIDK.K (Ions score 21)                    |
| 97 - 105    | 1169.6600 | 1168.6615 | 1168.5917 | 60  | 1    | R.FWADPIDKK.I (Ions score 51)                   |
| 205 - 213   | 1109.7219 | 1108.7146 | 1108.6532 | 55  | 0    | K.VYEFVLVLK.K (Ions score 25)                   |

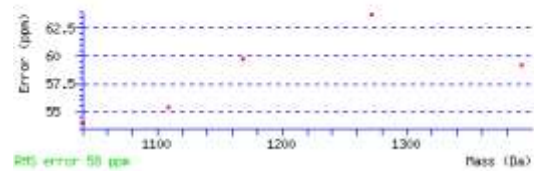

Spot No.: **29**

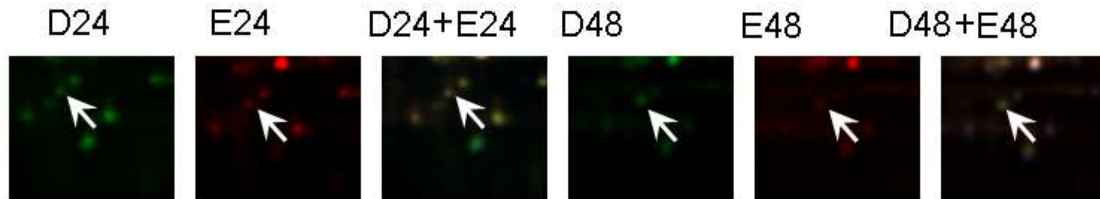

Accession No.: [scaffold0135\\_1578719.mRNA1](#)

Plant species: *Hevea brasiliensis*

Protein name: **Probable glutathione S-transferase**

**Peptide sequences:** **K.YEYREEDLR.N; R.FWADFIDK.K; R.FWADFIDKK.I; K.VYEFVLVLK.K**

PFF Mascot score: **[185]**

Sequence coverage %: **[12]**

Matched peptides No.: **[4]**

Calculated Mr: **25563**

Calculated pI: **6.23**

### Annotated PFF spectra:

Ions score is  $-10 \cdot \log(P)$ , where P is the probability that the observed match is a random event. Individual ions scores  $> 31$  indicate identity or extensive homology ( $p < 0.05$ ). Protein scores are derived from ions scores as a non-probabilistic basis for ranking protein hits.

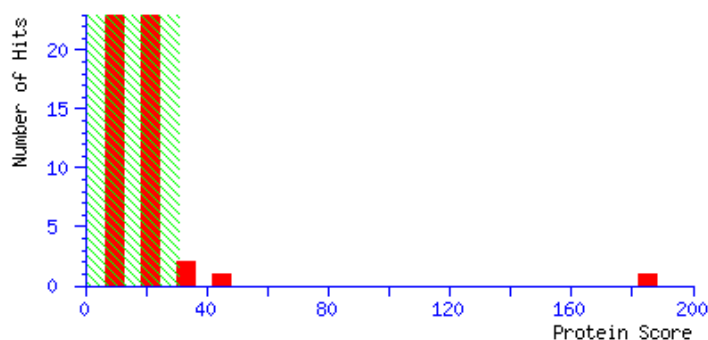



Matched peptide sequences: shown in **Bold Red**

```

1 MAEEVILLDF WSSPFGMRVR IALAEKGVKY EYREEDLRNK SPLLLQMNPF
51 HKKIPVLIHN GKPICESLIA VQYVDEVWKD KSPLLPSDPY QRAQARFWAD
101 FIDKKIYDIG RKIWTTKGDE QEAAKKEFIE ALKLLEGELG NKPYFGGESM
151 GYVDVALIPF YSWFYAYETC GNFSIEPECP VLIAWAKRCL QKESVSKSLP
201 DPQKVYEFVL VLKKKFGIE

```

Matched peptide information:

| Start - End | Observed  | Mr (expt) | Mr (calc) | ppm | Miss | Sequence      |                                   |
|-------------|-----------|-----------|-----------|-----|------|---------------|-----------------------------------|
| 30 - 38     | 1272.6244 | 1271.6171 | 1271.5782 | 31  | 1    | K.YEYREEDLR.N | ( <a href="#">Ions score 28</a> ) |
| 97 - 104    | 1041.4972 | 1040.4899 | 1040.4967 | -7  | 0    | R.FWADFIDK.K  | ( <a href="#">Ions score 61</a> ) |
| 97 - 105    | 1169.5955 | 1168.5882 | 1168.5917 | -3  | 1    | R.FWADFIDKK.I | ( <a href="#">Ions score 56</a> ) |
| 205 - 213   | 1109.6362 | 1108.6289 | 1108.6532 | -22 | 0    | K.VYEFVLVLK.K | ( <a href="#">Ions score 41</a> ) |

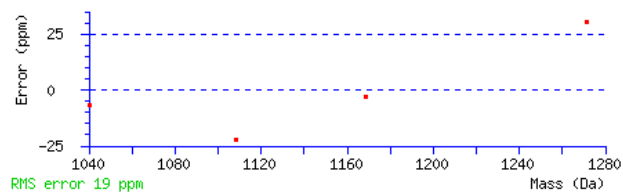

Spot No.: **30**

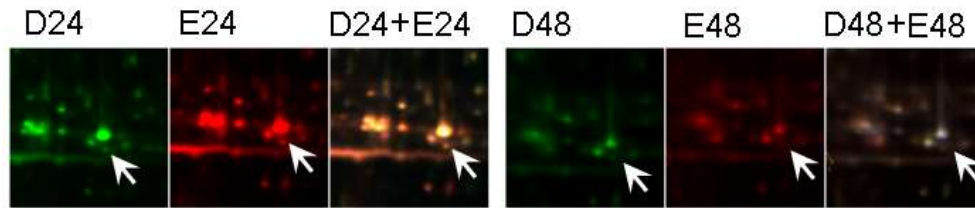

Accession No.: **scaffold0135\_1578719.mRNA1**

Plant species: ***Hevea brasiliensis***

Protein name: **Probable glutathione S-transferase**

Peptide sequences: **K.YEYREEDLR.N; R.FWADFIDKK.I**

PFF Mascot score: **[110]** Sequence coverage %: **[8]**

Matched peptides No.: **[2]**

Calculated Mr: **25563** Calculated pI: **6.23**

### Annotated PFF spectra:

Ions score is  $-10 \cdot \log(P)$ , where P is the probability that the observed match is a random event.  
Individual ions scores  $> 31$  indicate identity or extensive homology ( $p < 0.05$ ).  
Protein scores are derived from ions scores as a non-probabilistic basis for ranking protein hits.

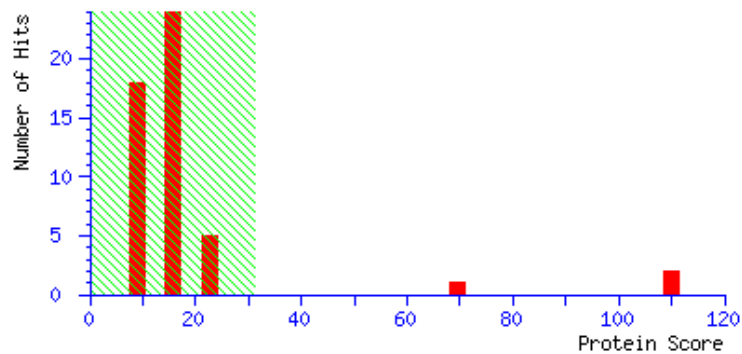

Matched peptide sequences: shown in **Bold Red**

```
1 MAEEVILLDF WSSPFGMRVR IALAEKGVKY EYREEDLRNK SPLLLQMNPV
51 HKKIPVLIHN GKPICESLIA VQYVDEVWKD KSPLLPSDPY QRAQARFWAD
101 FIDKKIYDIG RKIWTTKGDE QEAAKKEFIE ALKLLEGELG NKPYFGGESM
151 GYVDVALIPF YSWFYAYETC GNFSIEPECP VLIAWAKRCL QKESVSKSLP
201 DPQKVYEFVL VLKKKFGIE
```

Matched peptide information:

| Start - End | Observed  | Mr(expt)  | Mr(calc)  | ppm | Miss | Sequence      |                                   |
|-------------|-----------|-----------|-----------|-----|------|---------------|-----------------------------------|
| 30 - 38     | 1272.5231 | 1271.5158 | 1271.5782 | -49 | 1    | K.YEYREEDLR.N | ( <a href="#">Ions score 50</a> ) |
| 97 - 105    | 1169.5366 | 1168.5293 | 1168.5917 | -53 | 1    | R.FWADFIDKK.I | ( <a href="#">Ions score 61</a> ) |

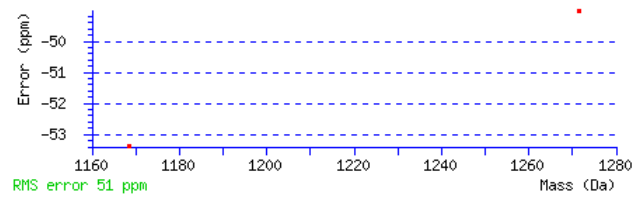

Spot No.: **31**

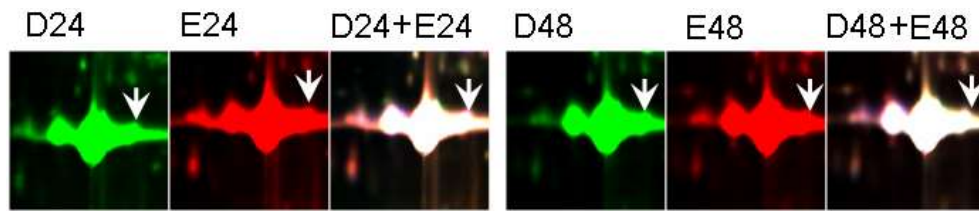

Accession No.: **scaffold1222\_60641.mRNA1**

Plant species: ***Hevea brasiliensis***

Protein name: **Small rubber particle protein**

**Peptide sequences:** **K.DISGPLKPGVDTIENVVK.T;**

**K.TVVTPVYYIPLEAVK.F ; K.FVDKTVDSVTSLDGVVPPVIK.Q;**

**K.QVSAQTYSVAQDAPR.I; R.IVLDVASSVENTGVQEGAK.A; K.ALYANLEPK.A;**

**K.AEQYAVITWR.A; R.ALNKLPLVPQVANVVVPTAVYFSEK.Y;**

**K.LPLVPQVANVVVPTAVYFSEK.Y; K.LPLVPQVANVVVPTAVYFSEKYNDVVR.G;**

**R.VSSYLPLLPTTEK.I**

PFF Mascot score: **[739]**

Sequence coverage %: **[74]**

Matched peptides No.: **[11]**

Calculated Mr: **22331**

Calculated pI: **4.80**

### Annotated PFF spectra:

Ions score is  $-10 \cdot \log(P)$ , where P is the probability that the observed match is a random event.

Individual ions scores  $> 31$  indicate identity or extensive homology ( $p < 0.05$ ).

Protein scores are derived from ions scores as a non-probabilistic basis for ranking protein hits.

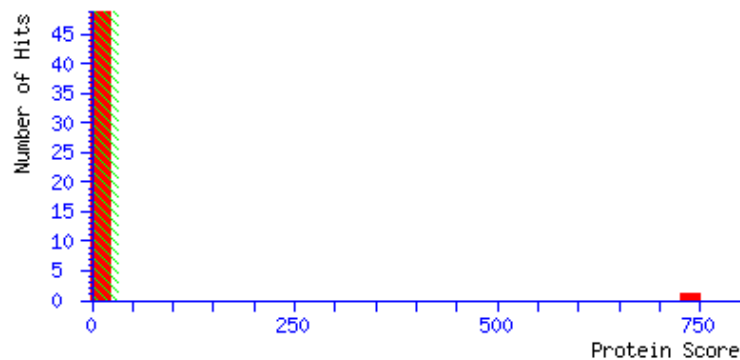

Matched peptide sequences: shown in **Bold Red**

```

1 MAEEVEEERL KYLDFVRAAG VYAVDSFSTL YLYAKDISGP LKPGVDTIEN
51 VVKTVVTPVY YIPLEAVKFV DKTVDVSVTS LDGVVPPVIK QVSAQTYSVA
101 QDAPRIVLDV ASSVENTGVQ EGAKALYANL EPKAEQYAVI TWRALNKLPL
151 VPQVANVVVP TAVYFSEKYN DVVRGTTEQG YRVSSYLPLL PTEKITKVFG
201 DEAS

```

Matched peptide information:

| Start - End | Observed  | Mr (expt) | Mr (calc) | ppm | Miss Sequence                                                |
|-------------|-----------|-----------|-----------|-----|--------------------------------------------------------------|
| 36 - 53     | 1881.0472 | 1880.0399 | 1880.0255 | 8   | 1 K.DISGPLKEPGVDTIEN <b>VV</b> K.Y (Ions score 11)           |
| 54 - 68     | 1691.9594 | 1690.9521 | 1690.9546 | -1  | 0 K.TVVTPVY <b>YIP</b> LEAVK.F (Ions score 68)               |
| 69 - 90     | 2314.2991 | 2313.2918 | 2313.2832 | 4   | 1 K.FVDKTVDSVTS <b>LDG</b> VVPPVIK.Q (Ions score 18)         |
| 91 - 105    | 1620.8217 | 1619.8144 | 1619.7903 | 15  | 0 K.QVSAQTY <b>SVA</b> GDAPR.I (Ions score 142)              |
| 106 - 124   | 1934.0342 | 1933.0269 | 1933.0157 | 6   | 0 R.IVLDVASSV <b>ENT</b> GVQ <b>EGAK</b> .A (Ions score 112) |
| 125 - 133   | 1018.5529 | 1017.5456 | 1017.5495 | -4  | 0 K.ALYANLEPK.A (Ions score 49)                              |
| 134 - 143   | 1236.6542 | 1235.6469 | 1235.6299 | 14  | 0 K.AEQYAVITWR.A (Ions score 88)                             |
| 144 - 168   | 2696.5498 | 2695.5425 | 2695.5313 | 4   | 1 R.ALNKLPLVPQVANVVVPTAVYFSEK.Y (Ions score 84)              |
| 148 - 168   | 2270.2610 | 2269.2537 | 2269.2722 | -8  | 0 K.LPLVPQVANVVVPTAVYFSEK.Y (Ions score 16)                  |
| 148 - 174   | 3016.6633 | 3015.6560 | 3015.6434 | 4   | 1 K.LPLVPQVANVVVPTAVYFSEKYN <b>DVVR</b> .G (Ions score 17)   |
| 183 - 194   | 1346.7416 | 1345.7343 | 1345.7493 | -11 | 0 R.VSSYLPLL <b>PTEK</b> .I (Ions score 29)                  |

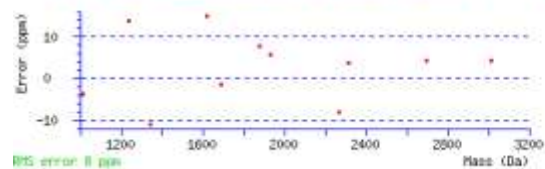

Spot No.: **32**

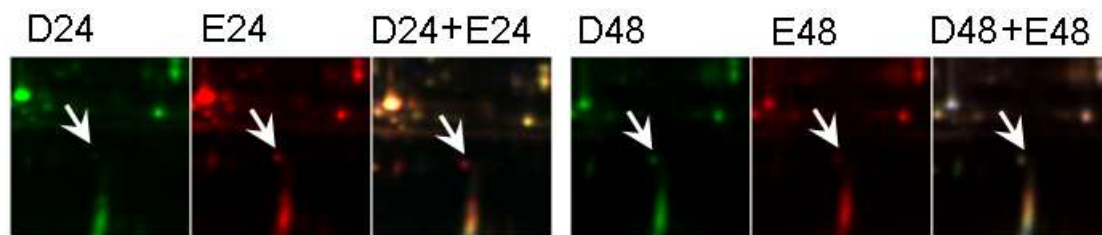

Accession No.: **scaffold1222\_100110.mRNA1**

Plant species: ***Hevea brasiliensis***

Protein name: **Rubber elongation factor protein**

**Peptide sequences:** **K.SGPFKPGVNTVESR.F; R.RVDAYVTVLDR.I**

PFF Mascot score: **[112]**      Sequence coverage %: **[14]**

Matched peptides No.: **[2]**

Calculated Mr: **19612**

Calculated pI: **5.28**

### **Annotated PFF spectra:**

Ions score is  $-10 \cdot \log(P)$ , where P is the probability that the observed match is a random event.

Individual ions scores  $> 30$  indicate identity or extensive homology ( $p < 0.05$ ).

Protein scores are derived from ions scores as a non-probabilistic basis for ranking protein hits.

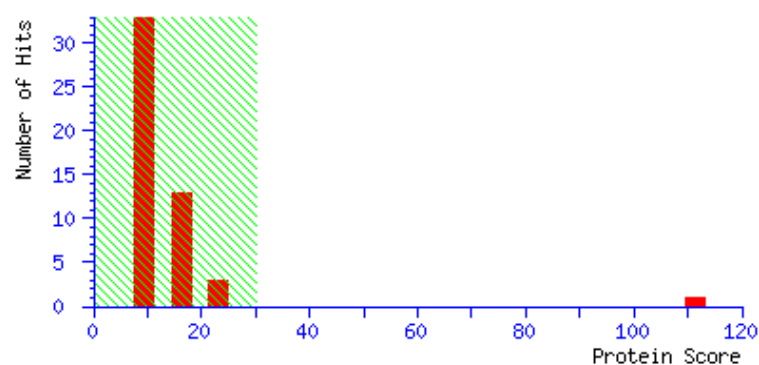

Matched peptide sequences: shown in **Bold Red**

```
1 MAEGEEEVNI QEEANKGEEN PQEEANIQEE TNKGEEENIQE EANIQEEANK
51 EEESLKYLDF VQAATVYARA SFSKLYLFAK DKSGPFKPGV NTVESRFKSV
101 VRPVYNKFQP VPNKVLKFAD RRVDAYVTVL DRIVPPIVKR ASIQAYSVAP
151 GAARAVASYL PLHTKRLSKV LYGDG
```

Matched peptide information:

| Start - End | Observed  | Mr(expt)  | Mr(calc)  | ppm | Miss | Sequence                                                    |
|-------------|-----------|-----------|-----------|-----|------|-------------------------------------------------------------|
| 83 - 96     | 1474.6901 | 1473.6828 | 1473.7576 | -51 | 1    | <b>K.SGPFKPGVNTVESR.F</b> ( <a href="#">Ions score 57</a> ) |
| 122 - 132   | 1306.6473 | 1305.6400 | 1305.7041 | -49 | 1    | <b>R.RVDAYVTVLDR.I</b> ( <a href="#">Ions score 55</a> )    |

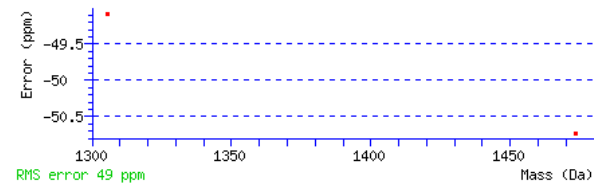



Spot No.: **33**

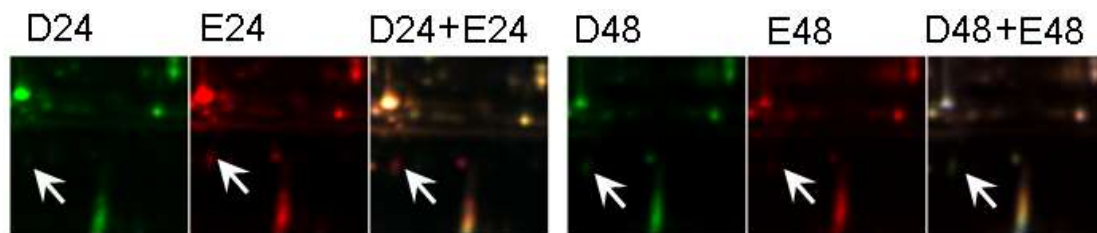

Accession No.: **scaffold0959\_355995.mRNA1**

Plant species: ***Hevea brasiliensis***

Protein name: **Probable glutathione peroxidase 2**

**Peptide sequences:** **K.AEFPIFDK.I; K.GGLFVDAIK.W**

PFF Mascot score: **[111]**      Sequence coverage %: **[8]**

Matched peptides No.: **[2]**

Calculated Mr: **22791**

Calculated pI: **8.29**

### **Annotated PFF spectra:**

Ions score is  $-10 \cdot \log(P)$ , where P is the probability that the observed match is a random event.

Individual ions scores  $> 31$  indicate identity or extensive homology ( $p < 0.05$ ).

Protein scores are derived from ions scores as a non-probabilistic basis for ranking protein hits.

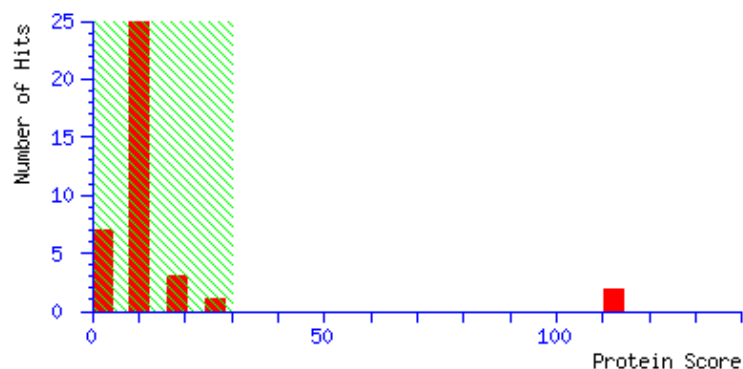

Matched peptide sequences: shown in **Bold Red**

```
1 MHFTNWWVSLA FLVFAVLLFY SYQTPLFFSS RNMAQESPKS IYDFTVKDIQ
51 GNDVSLSKYS GKVLLIVNVA SKCGFTQSNY KELNVLYEKY KNQGFEILAF
101 PCNQFAGQEP GSNEEIQEVA CTMFKAEFPI FDKIEVNGKN TAPLYKYLKS
151 EKGGLFVDAI KWNFTKFLVN KEGKVVERYA PTTSPLKIEK DIQNLLGSS
```

Matched peptide information:

| Start - End      | Observed        | Mr (expt)       | Mr (calc)       | ppm       | Miss     | Sequence                     |                                   |
|------------------|-----------------|-----------------|-----------------|-----------|----------|------------------------------|-----------------------------------|
| <b>126 - 133</b> | <b>966.5029</b> | <b>965.4956</b> | <b>965.4858</b> | <b>10</b> | <b>0</b> | <b>K.AEFP</b> <b>IFDK</b> .I | ( <a href="#">Ions score 55</a> ) |
| <b>153 - 161</b> | <b>919.5311</b> | <b>918.5239</b> | <b>918.5175</b> | <b>7</b>  | <b>0</b> | <b>K.GGLFVDAIK</b> .W        | ( <a href="#">Ions score 57</a> ) |

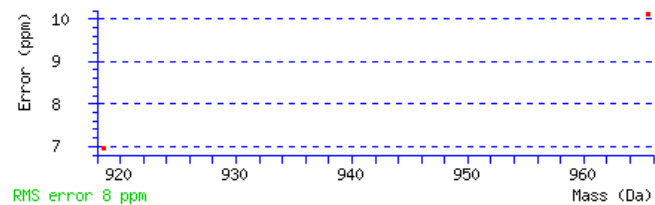

Spot No.: **34**

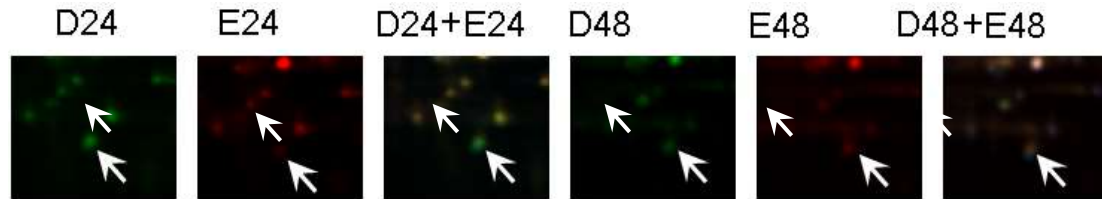

Accession No.: [scaffold0427\\_434785.mRNA1](#)

Plant species: *Hevea brasiliensis*

Protein name: **Superoxide dismutase [Mn], mitochondrial**

**Peptide sequences:** **K.HHPTYVTNFTALEQLNDAMEKGDPAAVVK.L;**

**R.EGGGEPPHSSLGWAIDTDFGSLEK.L; K.INAEGAALQSGWVWLALDK.E;**

**K.KLVVETTANQDPLVTK.G; K.NVRPDYLK.N; K.YASEVYAK.E**

PFF Mascot score: [\[356\]](#)

Sequence coverage %: [\[45\]](#)

Matched peptides No.: [\[6\]](#)

Calculated Mr: **26153**

Calculated pI: **7.82**

### Annotated PFF spectra:

Ions score is  $-10 \cdot \log(P)$ , where P is the probability that the observed match is a random event.

Individual ions scores  $> 30$  indicate identity or extensive homology ( $p < 0.05$ ).

Protein scores are derived from ions scores as a non-probabilistic basis for ranking protein hits.

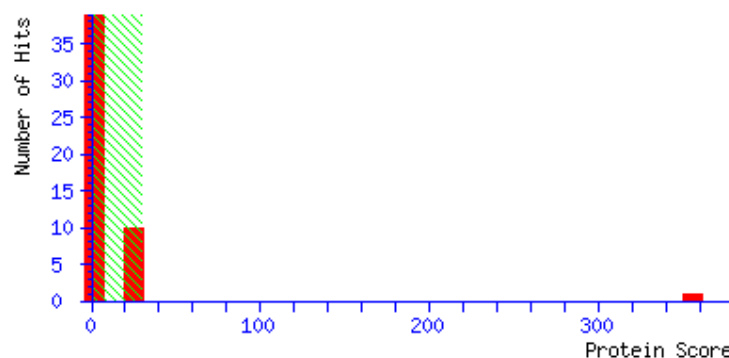

Matched peptide sequences: shown in **Bold Red**

```

1 MALRSLVARK TISSAFKAAT GLRLGQLRGI QTYSLPDLFY DYGALEPVIS
51 GEIMQLHHQK HHQTYVTNFN TALEQLNDAM EKGDEAAVVK LQSAIKFNGG
101 GHVNHSIFWK NLAPVREGGG EPPHSSLGWA IDTDFGSLEK LIQKINAEGA
151 ALQSGGWVL ALDKELKLV VETTANQDPL VTKGPSLIPL LGIDVWEHAY
201 YLQYKNVRPD YLKNIWKVMN WKYASEVYAK ECPSS

```

Matched peptide information:

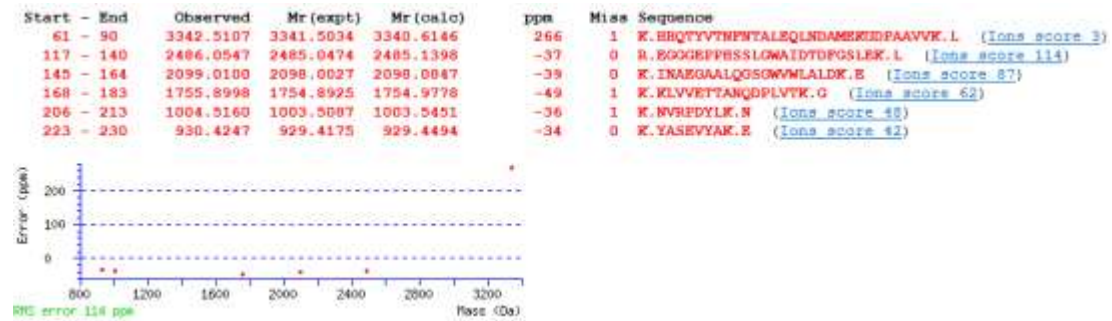

Spot No.: **35**

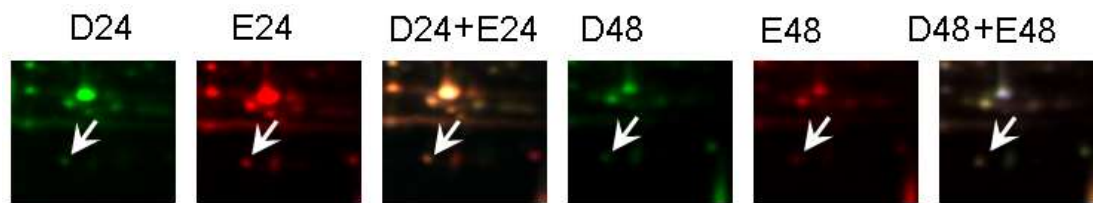

Accession No.: **scaffold1222\_100110.mRNA1**

Plant species: ***Hevea brasiliensis***

Protein name: **Rubber elongation factor protein**

**Peptide sequences:** **K.YLDFVQAATVYAR.A; K.SGPFKPGVNTVESR.F; K.SVVRPVYNK.F; R.RVDAYVTVLDR.I; R.VDAYVTVLDR.I; R.ASIQAYSVAPGAAR.A**

PFF Mascot score: **[507]** Sequence coverage %: **[34]**

Matched peptides No.: **[6]**

Calculated Mr: **19612**

Calculated pI: **5.28**

### Annotated PFF spectra:

Ions score is  $-10 \cdot \log(P)$ , where P is the probability that the observed match is a random event.

Individual ions scores  $> 31$  indicate identity or extensive homology ( $p < 0.05$ ).

Protein scores are derived from ions scores as a non-probabilistic basis for ranking protein hits.

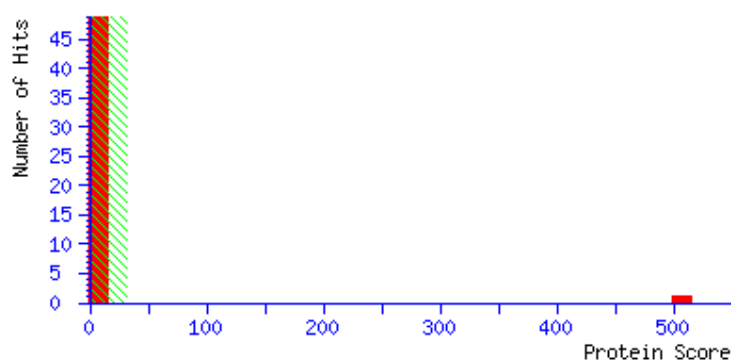

Matched peptide sequences: shown in **Bold Red**

```

1 MAEGEEEVNI QEEANKGEEN PQEEANIQEE TNKGEEENIQE EANIQEEANK
51 EEESLKYLDF VQAATVYARA SFSKLYLFAK DKSGPFKPGV NTVESRFSV
101 VRPVYKFQP VPNKVLKFAD RVDAYVTVL DRIVPPIVKR ASIQAYSVAP
151 GAARAVASYL PLHTKRLSKV LYGDG

```

Matched peptide information:

| Start - End | Observed  | Mr (expt) | Mr (calc) | ppm | Miss | Sequence                                              |
|-------------|-----------|-----------|-----------|-----|------|-------------------------------------------------------|
| 57 - 69     | 1516.7640 | 1515.7567 | 1515.7722 | -10 | 0    | K.YLDFVQAATVYAR.A ( <a href="#">Ions score 109</a> )  |
| 83 - 96     | 1474.7479 | 1473.7406 | 1473.7576 | -12 | 1    | K.SGPFKPGVNTVESR.F ( <a href="#">Ions score 113</a> ) |
| 99 - 107    | 1061.5902 | 1060.5829 | 1060.6029 | -19 | 1    | K.SVVRPVYK.F ( <a href="#">Ions score 28</a> )        |
| 122 - 132   | 1306.6814 | 1305.6741 | 1305.7041 | -23 | 1    | R.RVDAYVTVLDR.I ( <a href="#">Ions score 72</a> )     |
| 123 - 132   | 1150.5931 | 1149.5858 | 1149.6030 | -15 | 0    | R.VDAYVTVLDR.I ( <a href="#">Ions score 87</a> )      |
| 141 - 154   | 1361.6993 | 1360.6920 | 1360.7099 | -13 | 0    | R.ASIQAYSVAPGAAR.A ( <a href="#">Ions score 99</a> )  |

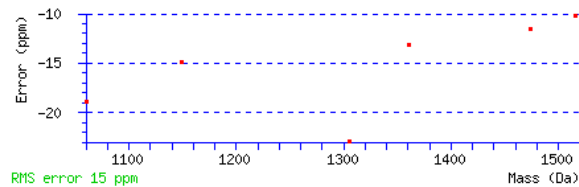

Spot No.: **36**

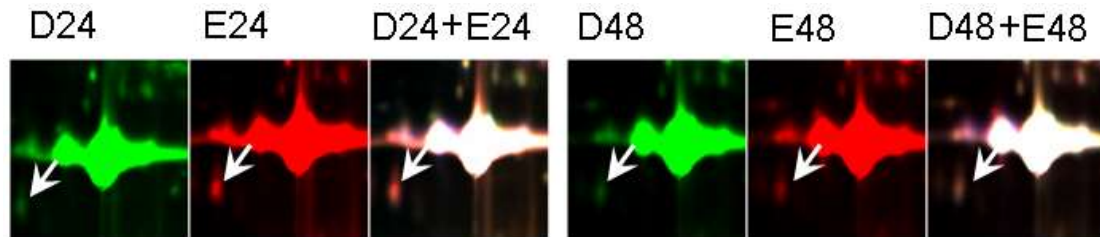

Accession No.: **scaffold0625\_591792.mRNA1**

Plant species: ***Hevea brasiliensis***

Protein name: **Translationally-controlled tumor protein**

**homolog**

**Peptide sequences:** **K.EIHNGILWEVEGK.W; R.EGATDPTFLYFAYALK.E;**  
**K.WVVQGAVDVDIGANPSAEGADEDEGVDDQAVK.V; K.VVDIVDTFR.L;**  
**R.LQEQAFAFDKK.Q; K.LSDLQFFVGESMHDDGSLVFAYYR.E;**

PFF Mascot score: **[376]**

Sequence coverage %: **[61]**

Matched peptides No.: **[6]**

Calculated Mr: **19156**

Calculated pI: **4.47**

**Annotated PFF spectra:**

Ions score is  $-10 \cdot \log(P)$ , where P is the probability that the observed match is a random event. Individual ions scores  $> 31$  indicate identity or extensive homology ( $p < 0.05$ ). Protein scores are derived from ions scores as a non-probabilistic basis for ranking protein hits.

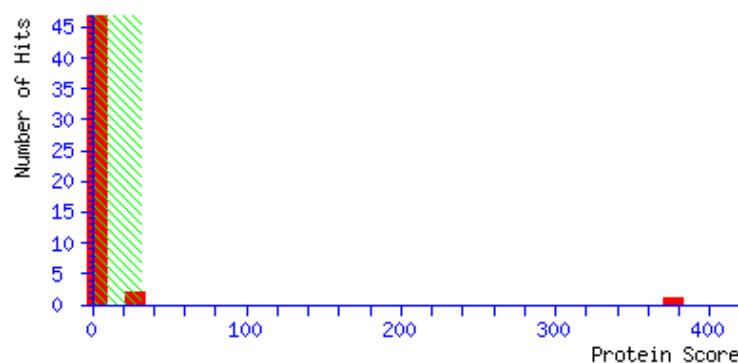

Matched peptide sequences: shown in **Bold Red**

```
1  MLVYQDLLTG DELLSDSFPY KEIHNGILWE VEGKVVVQGA VDVDIGANPS
51 AEGADEDEGV DDQAVKVVDI VDTFRLQEQP AFDKKQFVTY MKRFIKLLTP
101 KLDEEKQESF KKNIEGATKF LLSKLSDLQF FVGESMHDDG SLVFAYYREG
151 ATDPTFLYFA YALKEVKC
```

Matched peptide information:

| Start - End | Observed  | Mr (expt) | Mr (calc) | ppm | Miss Sequence                                        |
|-------------|-----------|-----------|-----------|-----|------------------------------------------------------|
| 22 - 34     | 1523.7277 | 1522.7204 | 1522.7780 | -38 | 0 K.EIHNGILWEVNGK.W (ions_score 38)                  |
| 35 - 66     | 3255.3733 | 3254.3660 | 3254.4852 | -37 | 0 K.VVVQGVVDVDIGANPSAEGADEGKVDQAVK.V (ions_score 51) |
| 67 - 75     | 1063.5427 | 1062.5394 | 1062.5710 | -33 | 0 K.VVDIVDTFR.L (ions_score 68)                      |
| 76 - 85     | 1203.5939 | 1202.5866 | 1202.6295 | -36 | 1 R.LQEQPAFDKQ.Q (ions_score 36)                     |
| 125 - 148   | 2796.1936 | 2795.1863 | 2795.2901 | -37 | 0 K.LSDLQFFVGESEMHDDGSLVFAYYR.E (ions_score 121)     |
| 149 - 164   | 1806.8230 | 1805.8157 | 1805.8876 | -40 | 0 R.EGATDPTFLYFAYALK.E (ions_score 62)               |

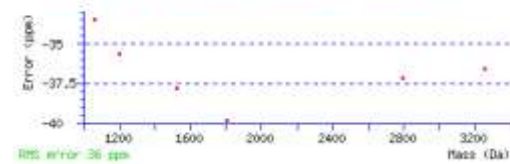



Spot No.: **37**

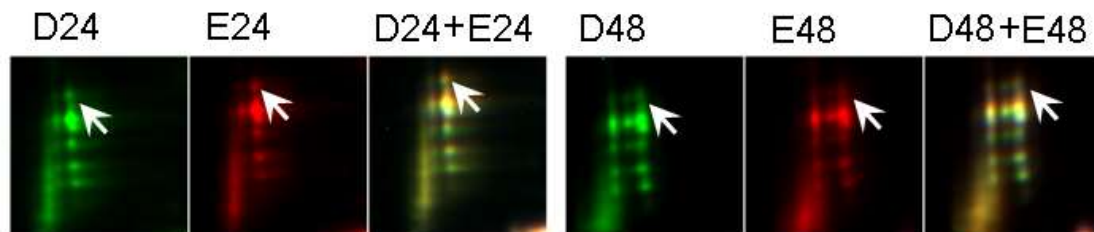

Accession No.: [scaffold3444\\_7763.mRNA1](#)

Plant species: *Hevea brasiliensis*

Protein name: **Elicitor-responsive protein 3**

**Peptide sequences:** **M.PLGTVEVLLVGAK.G;**  
**K.GLENTDFLNGVDPYVVLACR.T; K.FSFEVSDGDTELTK.I**

PFF Mascot score: [\[190\]](#) Sequence coverage %: [\[34\]](#)

Matched peptides No.: [\[3\]](#)

Calculated Mr: **15249** Calculated pI: **4.06**

### Annotated PFF spectra:

Ions score is  $-10 \cdot \log(P)$ , where P is the probability that the observed match is a random event. Individual ions scores  $> 31$  indicate identity or extensive homology ( $p < 0.05$ ). Protein scores are derived from ions scores as a non-probabilistic basis for ranking protein hits.

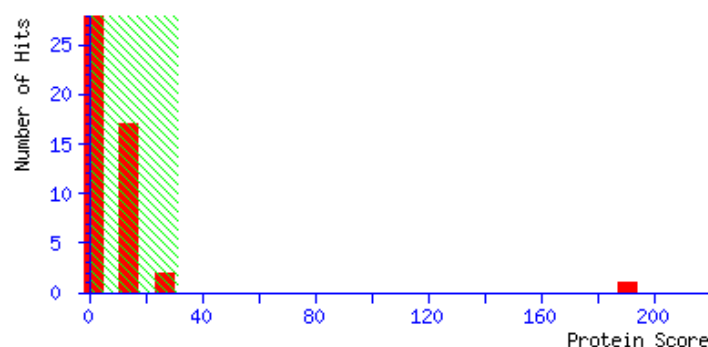

Matched peptide sequences: shown in **Bold Red**

1 M**PLGTVEVLL VGAKGLENTD FLNGVDPYVV LACRIQE**QKS SVASGKGSEP  
51 EWNEK**FSFEV SDGDTELT**LK IMDSDVGAAD DFGVGEATIP L EPLFLEG NLP  
101 STAYKVVK**EQ EYKGEITVGL TFTPEVEMDN VGVDGYDF**RL

Matched peptide information:

| Start - End | Observed  | Mr(expt)  | Mr(calc)  | ppm | Miss | Sequence                                                            |
|-------------|-----------|-----------|-----------|-----|------|---------------------------------------------------------------------|
| 2 - 14      | 1295.7573 | 1294.7500 | 1294.7860 | -28 | 0    | M. <b>PLGTVEVLLVGAK</b> .G ( <a href="#">ions score 45</a> )        |
| 15 - 34     | 2252.1482 | 2251.1409 | 2251.0943 | 21  | 0    | K. <b>GLENTDFLNGVDPYVVLACR</b> .T ( <a href="#">ions score 74</a> ) |
| 56 - 70     | 1687.7842 | 1686.7769 | 1686.7989 | -13 | 0    | K. <b>PSPEVSDGDTELT</b> LK.I ( <a href="#">ions score 72</a> )      |

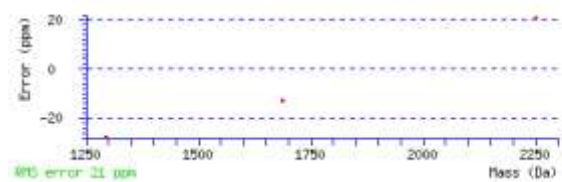

Spot No.: **38**

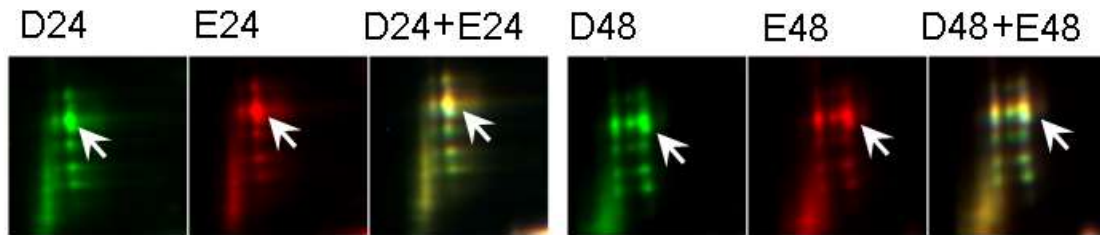

Accession No.: **scaffold3444\_7763.mRNA1**

Plant species: ***Hevea brasiliensis***

Protein name: **Elicitor-responsive protein 3**

**Peptide sequences:** **M.PLGTVEVLLVGAK.G;**  
**K.GLENTDFLNGVDPYVVLACR.T; K.FSFEVSDGDTELTK.I;**  
**K.GEITVGLTFTPEVEMDNVGVDGYDFR.L**

PFF Mascot score: **[446]**      Sequence coverage %: **[52]**

Matched peptides No.: **[4]**

Calculated Mr: **15249**      Calculated pI: **4.06**

### Annotated PFF spectra:

Ions score is  $-10 \cdot \log(P)$ , where P is the probability that the observed match is a random event.  
Individual ions scores  $> 31$  indicate identity or extensive homology ( $p < 0.05$ ).  
Protein scores are derived from ions scores as a non-probabilistic basis for ranking protein hits.

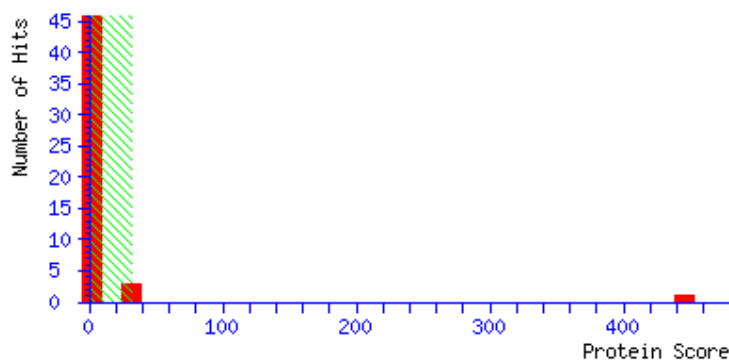

Matched peptide sequences: shown in **Bold Red**

1 **MPLGTVEVLL VGAKGLENTD FLNGVDPYVV LACRTQEQKS** SVASGKGSEP  
51 EWNEK**FSFEV SDGDTELT**LK IMDSDVGAAD DFGVGEATIP L EPLFLEGNLP  
101 STAYKVVKEQ EYK**GEITVGL TTFTEVEMDN VGVDGYDFRL**

Matched peptide information:

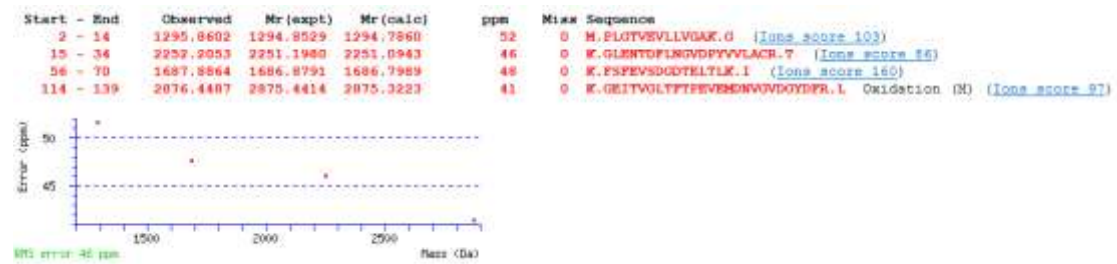

Spot No.: **39**

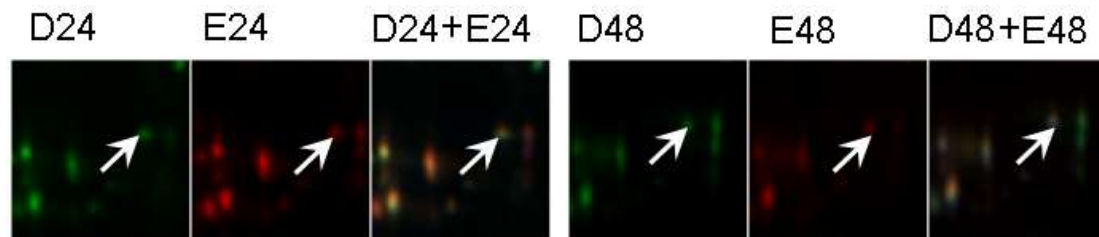

Accession No.: **scaffold0155\_515853.mRNA1**

Plant species: ***Hevea brasiliensis***

Protein name: **Pro-hevein**

**Peptide sequences:** **K.YGWTAFCGPVGAHGPSCGK.C;**

**R.IVDQCSNGGLDLNVNFR.Q; R.QLDTDGKGYER.G**

PFF Mascot score: **[190]**

Sequence coverage %: **[23]**

Matched peptides No.: **[3]**

Calculated Mr: **23042**

Calculated *pI*: **8.15**

### **Annotated PFF spectra:**

Ions score is  $-10 \cdot \log(P)$ , where  $P$  is the probability that the observed match is a random event.

Individual ions scores  $> 30$  indicate identity or extensive homology ( $p < 0.05$ ).

Protein scores are derived from ions scores as a non-probabilistic basis for ranking protein hits.

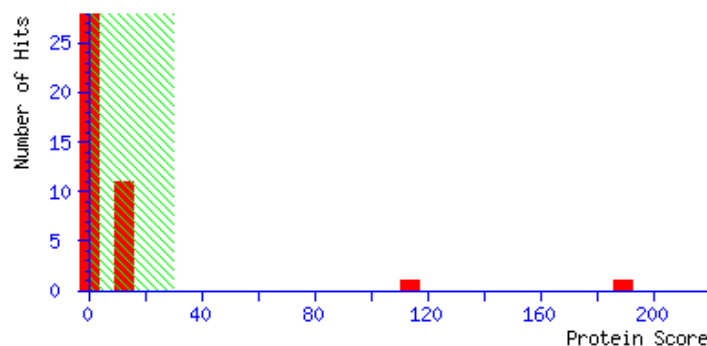

Matched peptide sequences: shown in **Bold Red**

```
1  MGRVMNIFIV VLLCLTGVAI AEQCGRQAGG KLCPNNLCCS QYGWCGSSDD
51 YCSPSKNCQS NCKGGGGGGG GGGGSASNVL ATYHLYNPQQ HGWDLNAVSA
101 YCSTWDANKP YSWRSKYGWT AFCGPVGAHG QPSCGKCLSV TNTGTGAKTT
151 VRIVDQCSNG GLDLDVNVFR QLDTDGKGYE RGHITVNYQF VNCGDSFNPL
201 FSIMKSSVIN
```

Matched peptide information:

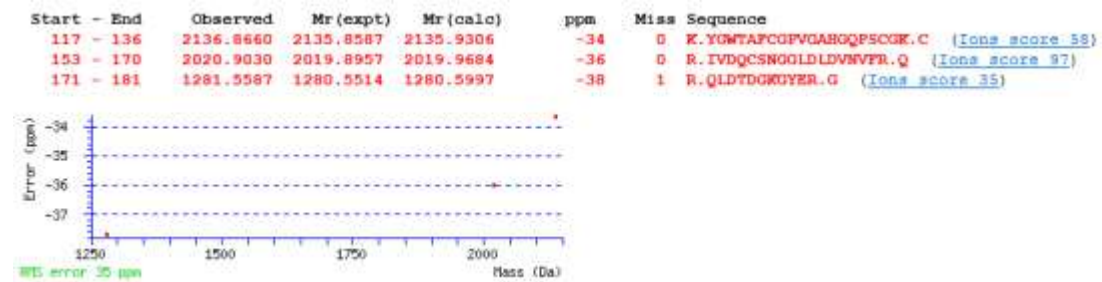

Spot No.: **40**

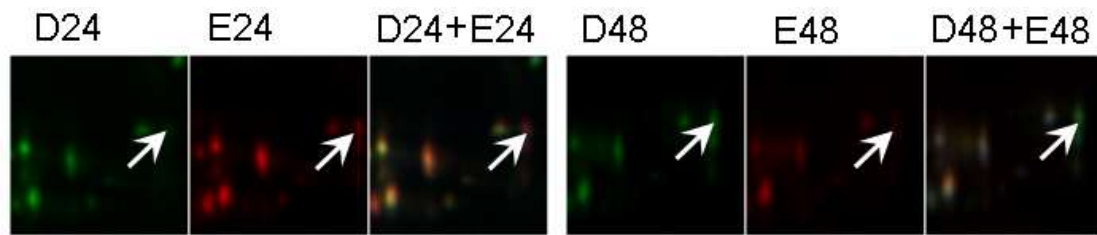

Accession No.: **scaffold0645\_687748.mRNA1**

Plant species: ***Hevea brasiliensis***

Protein name: **18.5 kDa class I heat shock protein**

**Peptide sequences:** **R.FEFANETSAFANTR.I;**  
**K.EEVKVEIEEGNVLQISGER.S; K.VEIEEGNVLQISGER.S; R.FRLPENAK.V**

PFF Mascot score: **[397]**      Sequence coverage %: **[25]**

Matched peptides No.: **[4]**

Calculated Mr: **18335**      Calculated pI: **6.00**

### **Annotated PFF spectra:**

Ions score is  $-10 \cdot \log(P)$ , where P is the probability that the observed match is a random event.  
Individual ions scores  $> 30$  indicate identity or extensive homology ( $p < 0.05$ ).  
Protein scores are derived from ions scores as a non-probabilistic basis for ranking protein hits.

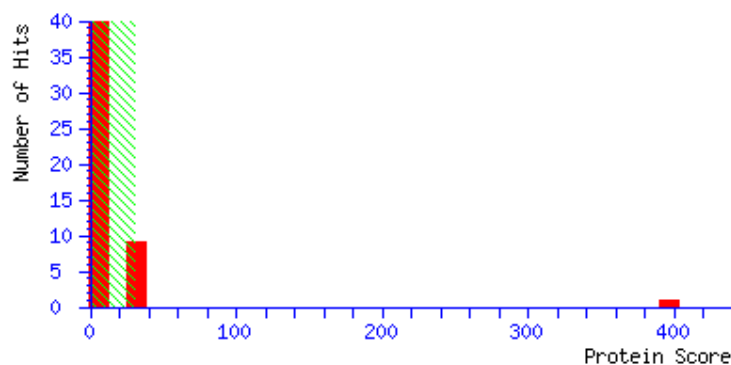

Matched peptide sequences: shown in **Bold Red**

```
1 MSLIPSSLFG GRTNIFDPF SLDVWDPFHD FPFSTALSA PRFEPANETS
51 AFANTRIDWK ETPEAHVFKA DLPGLKKEEV KVEIEEGNVL QISGERSKEK
101 EEKNDKLHRV ERSSGKFLRR FRLPENAKVD QVKASMESGV LITVTPKEEV
151 KKPDVKAIDI SG
```

Matched peptide information:

| Start - End | Observed  | Mr(expt)  | Mr(calc)  | ppm | Miss Sequence                                                |
|-------------|-----------|-----------|-----------|-----|--------------------------------------------------------------|
| 43 - 56     | 1604.7509 | 1603.7436 | 1603.7267 | 11  | 0 R.FEPANETSAPANTR.I ( <a href="#">Ions score 116</a> )      |
| 78 - 96     | 2157.1218 | 2156.1145 | 2156.0961 | 9   | 1 K.REVKVEIEEGNVLQISGER.S ( <a href="#">Ions score 164</a> ) |
| 82 - 96     | 1671.8698 | 1670.8625 | 1670.8475 | 9   | 0 K.VEIEEGNVLQISGER.S ( <a href="#">Ions score 137</a> )     |
| 121 - 128   | 974.5561  | 973.5488  | 973.5345  | 15  | 1 R.FRLPENAK.V ( <a href="#">Ions score 40</a> )             |

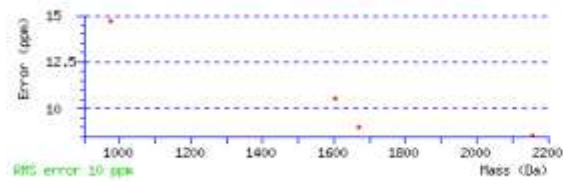



Spot No.: **41**

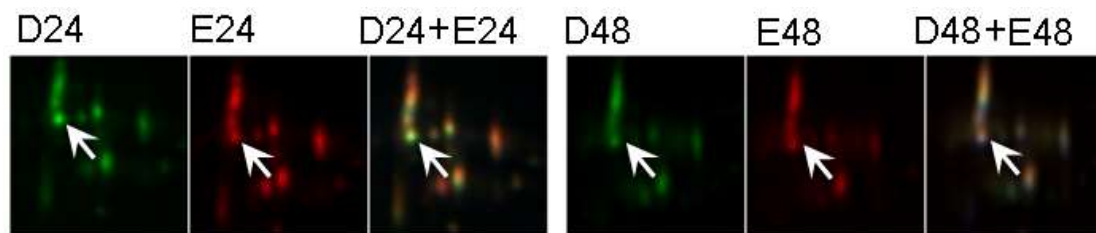

Accession No.: **scaffold0155\_515853.mRNA1**

Plant species: ***Hevea brasiliensis***

Protein name: **Pro-hevein**

**Peptide sequences:** **K.YGWTAFCGPVGAHGPSCGK.C;**

**R.IVDQCSNGGLDLNVNFR.Q; R.QLDTDGKGYER.G**

PFF Mascot score: **[132]**

Sequence coverage %: **[23]**

Matched peptides No.: **[3]**

Calculated Mr: **23042**

Calculated pI: **8.15**

### **Annotated PFF spectra:**

Ions score is  $-10 \cdot \log(P)$ , where P is the probability that the observed match is a random event.

Individual ions scores  $> 31$  indicate identity or extensive homology ( $p < 0.05$ ).

Protein scores are derived from ions scores as a non-probabilistic basis for ranking protein hits.

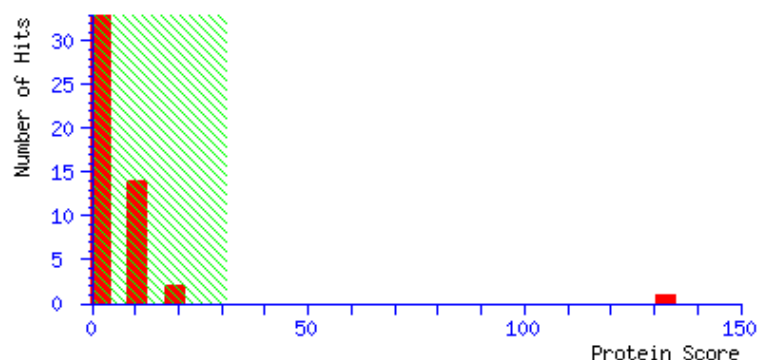

Matched peptide sequences: shown in **Bold Red**

```
1  MGRVMNIFIV VLLCLTGVAI AEQCGRQAGG KLCPNNLCCS QYGWCGSSDD
51 YCSPSKNCQS NCKGGGGGGG GGGGSASNVL ATYHLYNPQQ HGWDLNAVSA
101 YCSTWDANKP YSWRSKYGT AFCGPVGAHG QPCGKCLSV TNTGTGAKTT
151 VRIVDQCSNG GLDLVNVER QLDTDGKGYE RGHLTVNYQF VNCGDSFNPL
201 FSIMKSSVIN
```

Matched peptide information:

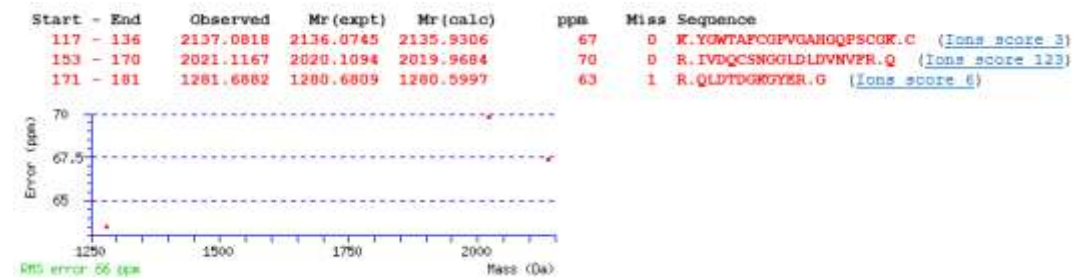

Spot No.: **42**

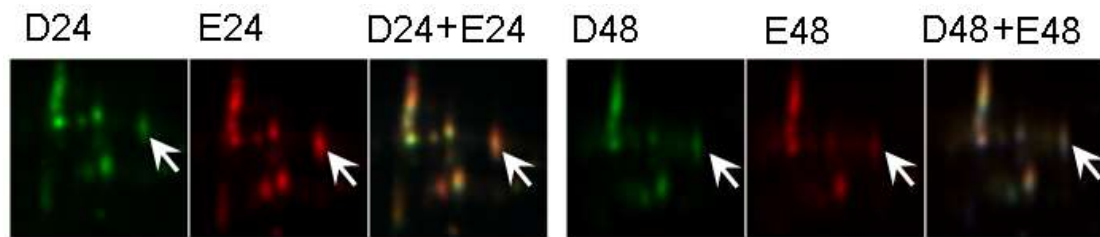

Accession No.: **scaffold0872\_395492.mRNA1**

Plant species: ***Hevea brasiliensis***

Protein name: **Eukaryotic translation initiation factor 5A**

**Peptide sequences:** **K.TYPQQAGTIR.K; K.CHFVGIDIFNAK.K;**  
**K.KLEDIVPSSHNCDVPHVTR.T; R.TDYQLIDISEDGFVSLTENGNTK.D;**  
**K.DDLRLPTDENLLSQIK.D; R.LPTDENLLSQIK.D; K.DLVVTVMSSMGEEQICALK.D**

PFF Mascot score: **[483]** Sequence coverage %: **[62]**

Matched peptides No.: **[7]**

Calculated Mr: **17689** Calculated pI: **5.60**

### Annotated PFF spectra:

Ions score is  $-10 \cdot \log(P)$ , where P is the probability that the observed match is a random event.  
Individual ions scores  $> 30$  indicate identity or extensive homology ( $p < 0.05$ ).  
Protein scores are derived from ions scores as a non-probabilistic basis for ranking protein hits.

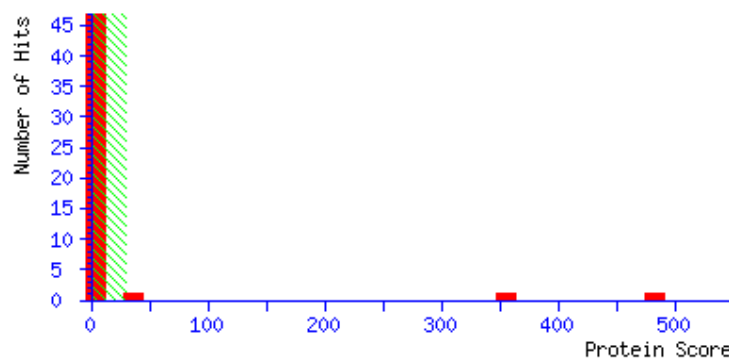

Matched peptide sequences: shown in **Bold Red**

```

1 MSDEEHHFES KADAGASKTY PQQAGTIRKN GYIVIKNRPC KVV DVSTSKT
51 GK HGHAKCHF VGIDIFNAK LEDIVPSSHN CDVPHVTRTD YQLIDISEDG
101 FVSLLTENGN TKDDLRLPTD ENLLSQIKDG FAEGKDLVVT VMSSMGEEQI
151 CALKDIGPK

```

Matched peptide information:

| Start - End | Observed  | Mr (expt) | Mr (calc) | ppm | Miss Sequence                                     |
|-------------|-----------|-----------|-----------|-----|---------------------------------------------------|
| 19 - 28     | 1134.6040 | 1133.5967 | 1133.5829 | 12  | 0 K.TYPQAGTIR.K (ions score 63)                   |
| 58 - 69     | 1420.7086 | 1419.7013 | 1419.6969 | 3   | 0 K.CHPVGIDIFNAK.K (ions score 74)                |
| 70 - 88     | 2203.1091 | 2202.1018 | 2202.0852 | 8   | 1 K.KLEDIVPSSHNCDVPHVTR.T (ions score 121)        |
| 89 - 112    | 2672.3103 | 2671.3030 | 2671.2865 | 6   | 0 R.TDYQLIDISEDGFVSLTENONTK.D (ions score 65)     |
| 113 - 128   | 1870.0052 | 1868.9979 | 1868.9843 | 7   | 1 K.DDLRLPTDENLLSQIK.D (ions score 78)            |
| 117 - 128   | 1370.7583 | 1369.7510 | 1369.7453 | 4   | 0 R.LPTDENLLSQIK.D (ions score 37)                |
| 136 - 154   | 2110.0283 | 2109.0210 | 2109.0156 | 3   | 0 K.DLVVTVMSSMGEEQ <b>CALK</b> .D (ions score 46) |

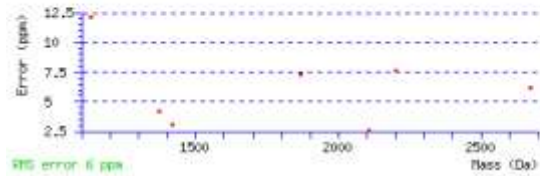

Spot No.: **43**

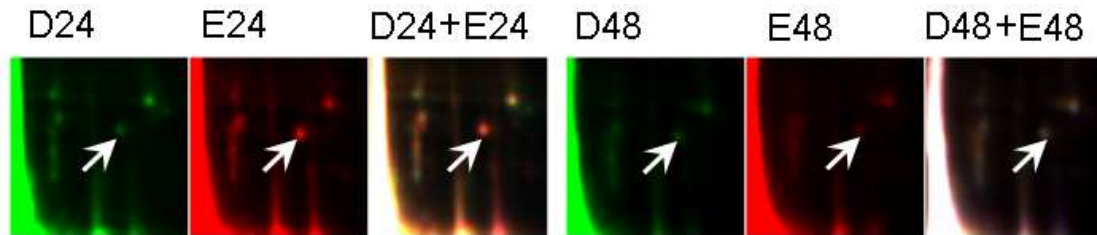

Accession No.: **scaffold1222\_181260.mRNA1**

Plant species: ***Hevea brasiliensis***

Protein name: **Small rubber particle protein**

**Peptide sequences:** **K.EVDVEEER.L; K.YLDFVQTGAVFALVSFSK.L;**

**K.DVSGPFKPYVENAGGR.F; K.SVVRPIYYK.F; K.FQPVSNEILK.F;**

**K.FADHKVDESVTILDLFVPPIVK.Q; K.VDESVTILDLFVPPIVK.Q;**

**K.QLCTQAYSVAR.D; R.DAPVVACALTYLLSPNEK.F**

PFF Mascot score: **[868]**

Sequence coverage %: **[73]**

Matched peptides No.: **[9]**

Calculated Mr: **17567**

Calculated pI: **4.98**

### **Annotated PFF spectra:**

Ions score is  $-10 \cdot \log(P)$ , where P is the probability that the observed match is a random event.

Individual ions scores  $> 31$  indicate identity or extensive homology ( $p < 0.05$ ).

Protein scores are derived from ions scores as a non-probabilistic basis for ranking protein hits.

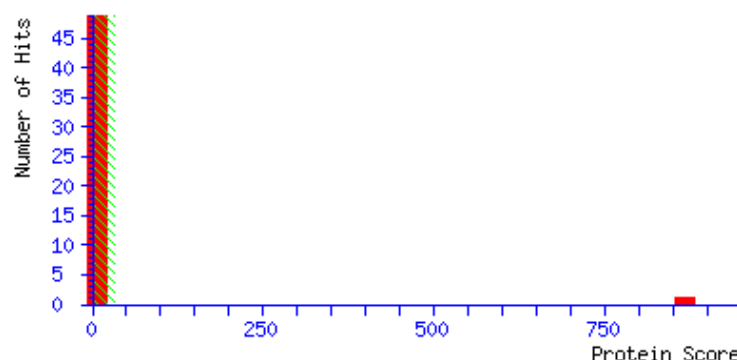

Matched peptide sequences: shown in **Bold Red**

```

1  MGEGEENKNI QEEVNKEANI QKEVDVEEER LKYLDFVQTG AVFALVSFSK
51 LYLFAKDVSG PFKPYVENAG GRFKSVVRPI YYKFQPVSN E ILKFADHKVD
101 ESVTILDLFV PPIVKQLCTQ AYSVARDAPV VACALTYLL SPNEKFYMVL
151 YGDG

```

Matched peptide information:

| Start | End | Observed  | Mr(expt)  | Mr(calc)  | ppm | Miss | Sequence                                   |
|-------|-----|-----------|-----------|-----------|-----|------|--------------------------------------------|
| 23    | 30  | 1004.4271 | 1003.4198 | 1003.4458 | -26 | 0    | K.EVDVEEER.L (Ions score 48)               |
| 33    | 50  | 1991.9822 | 1990.9749 | 1991.0404 | -33 | 0    | K.YLDFVQTGAVFALVSFSK.L (Ions score 124)    |
| 57    | 72  | 1692.7847 | 1691.7774 | 1691.8267 | -29 | 1    | K.DVSGPPKPYVENAGGR.F (Ions score 127)      |
| 75    | 83  | 1124.6118 | 1123.6045 | 1123.6390 | -31 | 1    | K.SVVRPIYYK.F (Ions score 42)              |
| 84    | 93  | 1174.6091 | 1173.6018 | 1173.6394 | -32 | 0    | K.PQPVSNELK.F (Ions score 65)              |
| 94    | 115 | 2482.2817 | 2481.2744 | 2481.3519 | -31 | 1    | K.FADSRVDESVTILDLPVPPVK.Q (Ions score 153) |
| 99    | 115 | 1884.0078 | 1883.0005 | 1883.0656 | -35 | 0    | K.VDESVTILDLPVPPVK.Q (Ions score 94)       |
| 116   | 126 | 1296.6011 | 1295.5938 | 1295.6292 | -27 | 0    | K.QLCTQAYSVA.D (Ions score 84)             |
| 127   | 145 | 2124.0017 | 2122.9944 | 2123.0609 | -31 | 0    | R.DAPVVACALTYLLSPNEK.F (Ions score 131)    |

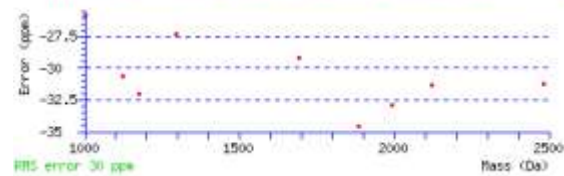

Spot No.: **44**

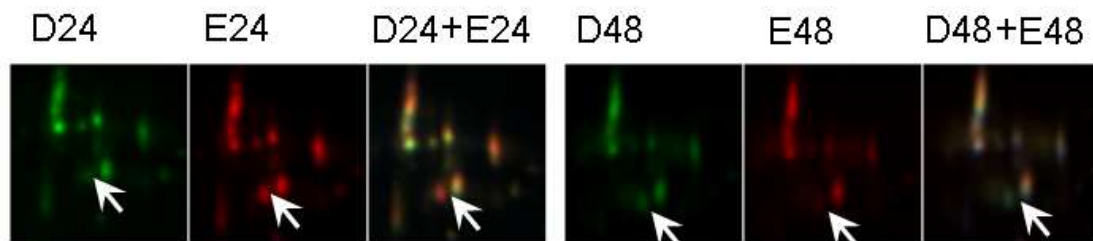

Accession No.: **scaffold0464\_317117.mRNA1**

Plant species: ***Hevea brasiliensis***

Protein name: **Actin-depolymerizing factor 2**

**Peptide sequences:** **K.LGEPTQSYEDFTASLPADCR.Y;**

**R.YAVYDFDFVTEENCQK.S; R.IFFIAWSPDTSR.V**

PFF Mascot score: **[244]**

Sequence coverage %: **[35]**

Matched peptides No.: **[3]**

Calculated Mr: **16220**

Calculated *pI*: **5.92**

### **Annotated PFF spectra:**

Ions score is  $-10 \cdot \log(P)$ , where  $P$  is the probability that the observed match is a random event.

Individual ions scores  $> 30$  indicate identity or extensive homology ( $p < 0.05$ ).

Protein scores are derived from ions scores as a non-probabilistic basis for ranking protein hits.

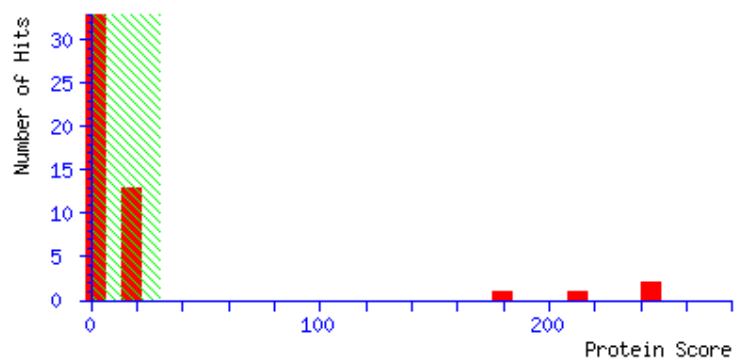

Matched peptide sequences: shown in **Bold Red**

1 MANAASGMV HDDCKLRFLE LKAKRTYRYI VFKIEEKAKQ VIVEK**LGEPT**  
51 **QSYEDFTASL PADECYAVY DFDFVTEENC QKSRIFFIAW SPDTSR**VRSK  
101 MIYASSKDRF KRELDGIQVE LQATDPTMG LDVFKSRAS

Matched peptide information:

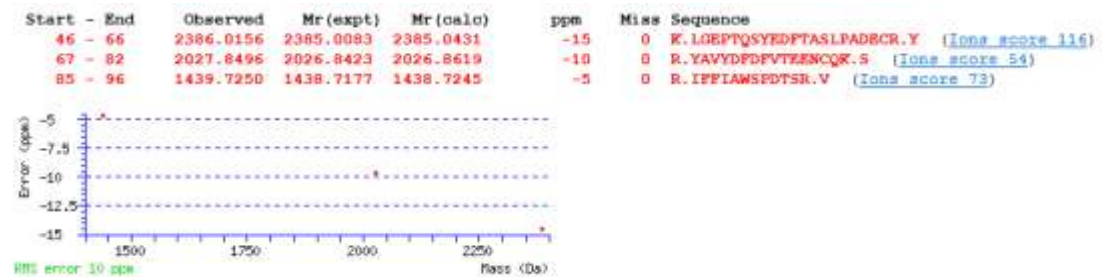



Spot No.: **45**

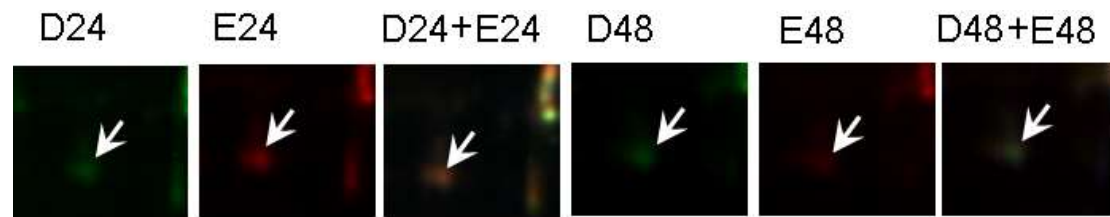

Accession No.: **scaffold0464\_317117.mRNA1**

Plant species: ***Hevea brasiliensis***

Protein name: **Actin-depolymerizing factor 2**

**Peptide sequences:** **K.LGEPTQSYEDFTASLPADECR.Y;**

**R.YAVYDFDFVTEENCQK.S; R.IFFIAWSPDTSR.V;**

**R.ELDGIQVELQATDPTEMGLDVFK.S**

PFF Mascot score: **[365]**

Sequence coverage %: **[51]**

Matched peptides No.: **[4]**

Calculated Mr: **16220**

Calculated pI: **5.92**

### **Annotated PFF spectra:**

Ions score is  $-10 \cdot \log(P)$ , where P is the probability that the observed match is a random event.

Individual ions scores  $> 31$  indicate identity or extensive homology ( $p < 0.05$ ).

Protein scores are derived from ions scores as a non-probabilistic basis for ranking protein hits.

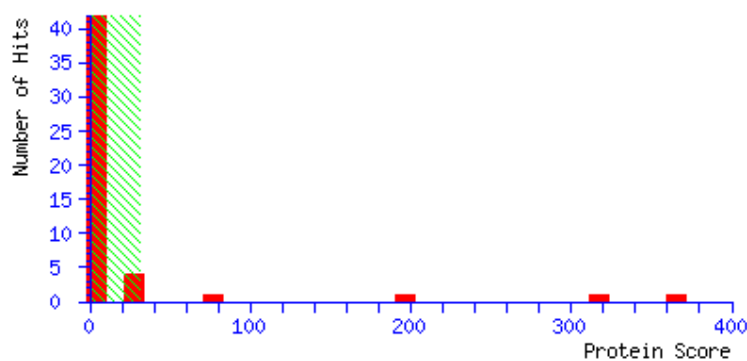

Matched peptide sequences: shown in **Bold Red**

```

1 MANAASGMAY HDDCKLRFLE LKAKRTYRYI VFKIEEKAKQ VIVEKLGEPT
51 QSYEDFTASL PADECYAVY DFDFVTEENC QKSRIFFIAW SPDTSRVRSK
101 MIYASSKDRF KRELDGIQVE LQATDPTEMG LDVFKSRAS

```

Matched peptide information:

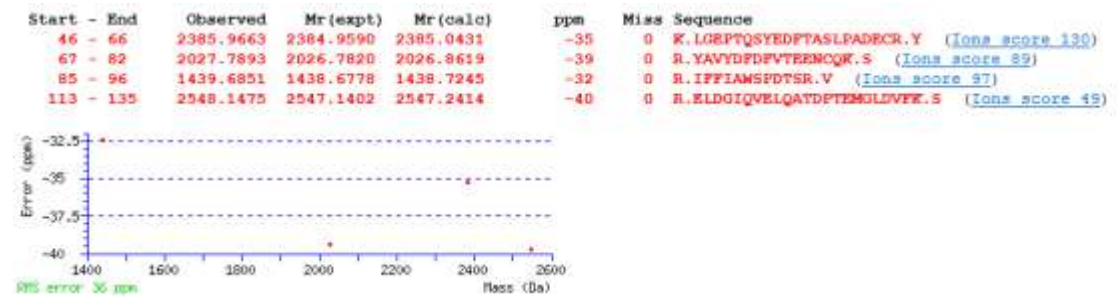

Spot No.: **46**

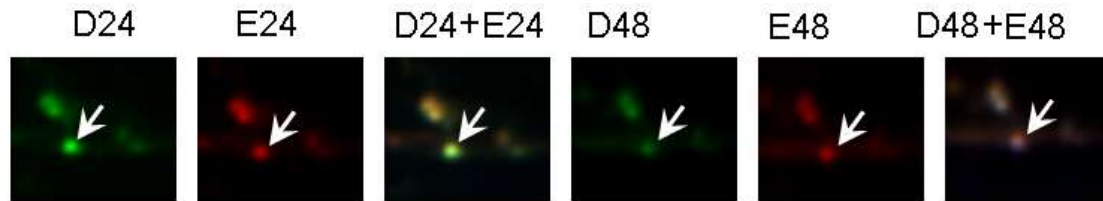

Accession No.: **scaffold0155\_515853.mRNA1**

Plant species: ***Hevea brasiliensis***

Protein name: **Pro-hevein**

**Peptide sequences:** **K.YGWTAFCGPVGAHGPSCGK.C;**

**R.IVDQCSNGGLDLVDNVFR.Q; R.QLDTDGKGYER.G**

PFF Mascot score: **[329]**

Sequence coverage %: **[23]**

Matched peptides No.: **[3]**

Calculated Mr: **23042**

Calculated pI: **8.15**

### **Annotated PFF spectra:**

Ions score is  $-10 \cdot \log(P)$ , where P is the probability that the observed match is a random event.

Individual ions scores  $> 30$  indicate identity or extensive homology ( $p < 0.05$ ).

Protein scores are derived from ions scores as a non-probabilistic basis for ranking protein hits.

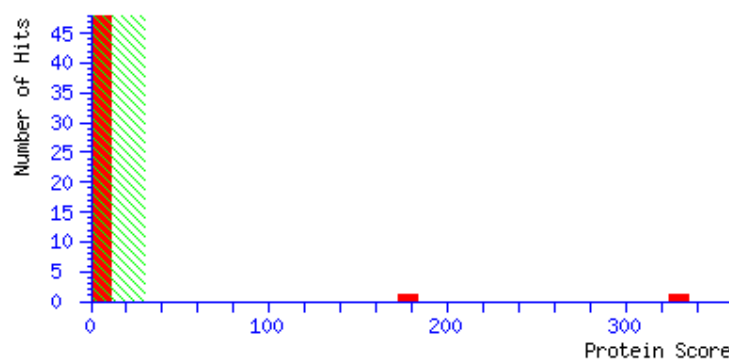

Matched peptide sequences: shown in **Bold Red**

```
1  MGRVMNIFIV VLLCLTGVAI AEQCGRQAGG KLCNNLCCS QYGWCGSSDD
51 YCSPSKNCQS NCKGGGGGGG GGGGSASNVL ATYHLYNPQQ HGWDLNAVSA
101 YCSTWDANKP YSWRSKYGT AFCGPVGAHG QPSCKCLSV INTGTGAKTT
151 VRIVDQCSNG GLDLNVNFR QLDTDGKGYE RGHLTVNYQF VNCGDSFNPL
201 FSIMKSSVIN
```

Matched peptide information:

| Start - End | Observed  | Mr(expt)  | Mr(calc)  | ppm | Miss | Sequence                                                           |
|-------------|-----------|-----------|-----------|-----|------|--------------------------------------------------------------------|
| 117 - 136   | 2136.8838 | 2135.8765 | 2135.9306 | -25 | 0    | K.YGWT <b>AFCGPVGAHGQPSCK</b> .C ( <a href="#">Ions score 88</a> ) |
| 153 - 170   | 2020.9237 | 2019.9164 | 2019.9684 | -26 | 0    | R.IVD <b>QCSNGGLDLNVNFR</b> .Q ( <a href="#">Ions score 150</a> )  |
| 171 - 181   | 1281.5817 | 1280.5744 | 1280.5997 | -20 | 1    | R. <b>QLD</b> TDGKGYE.R.G ( <a href="#">Ions score 91</a> )        |

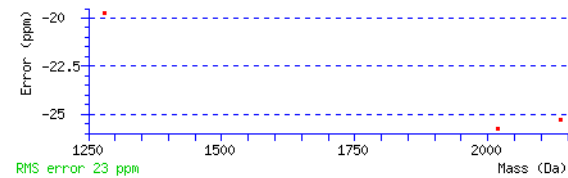

Spot No.: **47**

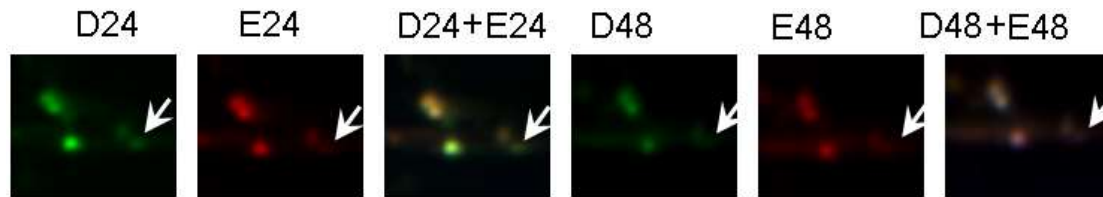

Accession No.: **scaffold0696\_83618.mRNA1**

Plant species: ***Hevea brasiliensis***

Protein name: **14 kDa zinc-binding protein**

**Peptide sequences:** **K.AAALTAVPSDPTIFDK.I;**  
**K.EIPC�VVYEDDKVLAFK.D; K.DISQAPTHLIIPK.V; K.QEGLEDGFR.I;**  
**R.IVINDGPNGCQSVYHLHIHLLGGR.Q**

PFF Mascot score: **[144]** Sequence coverage %: **[56]**

Matched peptides No.: **[5]**

Calculated Mr: **16097** Calculated pI: **6.29**

### Annotated PFF spectra:

Ions score is  $-10 \cdot \log(P)$ , where P is the probability that the observed match is a random event. Individual ions scores  $> 30$  indicate identity or extensive homology ( $p < 0.05$ ). Protein scores are derived from ions scores as a non-probabilistic basis for ranking protein hits.

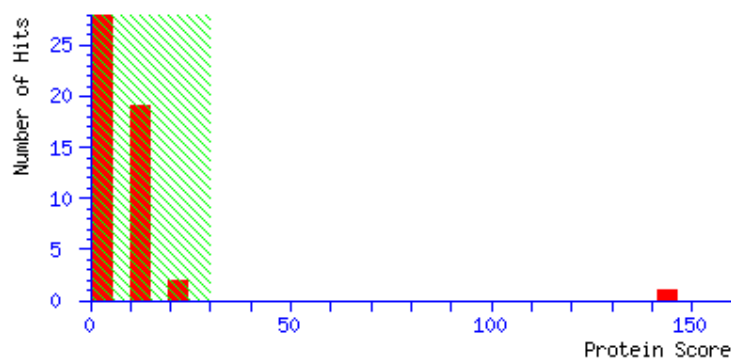

Matched peptide sequences: shown in **Bold Red**

```

1 MEENIKGRIS VLSSHIMASE KAAALTAVPS DSPTIFDKII NKEEIPCNVVY
51 EDDKVLAFKD ISPQAPTHIL IIPKVKDGLT GLSKAEERHC DILGRLLYTA
101 KLIAKQEGLE DGFRIVINDG PNGCQSVYHL HIHLLGGRQM NWPPG

```

Matched peptide information:

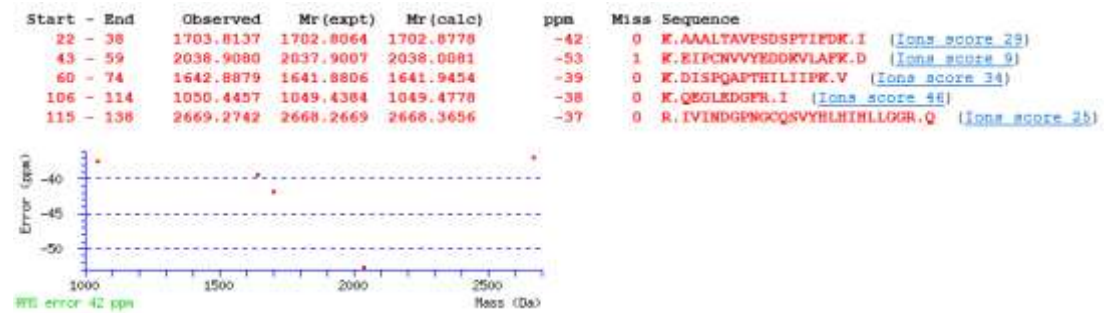

Spot No.: **48**

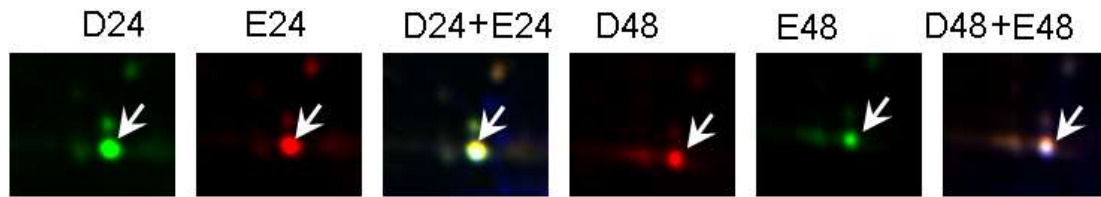

Accession No.: **scaffold0155\_515853.mRNA1**

Plant species: ***Hevea brasiliensis***

Protein name: **Pro-hevein**

**Peptide sequences:** **K.YGWTAFCGPVGAHGPSCGK.C;**

**R.IVDQCSNGGLDLVDNVFR.Q; R.QLDTDGKGYER.G**

PFF Mascot score: **[348]**      Sequence coverage %: **[23]**

Matched peptides No.: **[3]**

Calculated Mr: **23042**

Calculated pI: **8.15**

### **Annotated PFF spectra:**

Ions score is  $-10 \cdot \log(P)$ , where P is the probability that the observed match is a random event.

Individual ions scores  $> 31$  indicate identity or extensive homology ( $p < 0.05$ ).

Protein scores are derived from ions scores as a non-probabilistic basis for ranking protein hits.

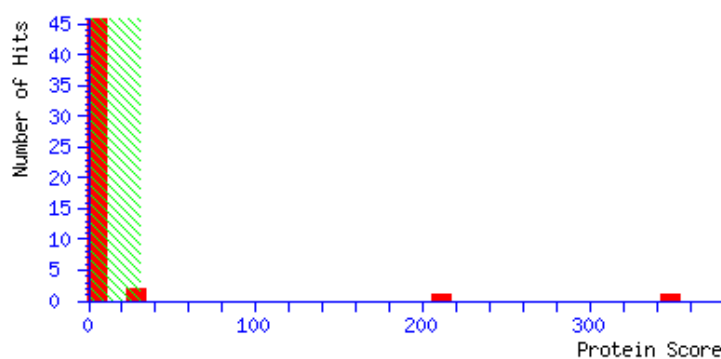

Matched peptide sequences: shown in **Bold Red**

```
1 MGRVMNIFIV VLLCLTGVAI AEQCGRQAGG KLCPPNNLCCS QYGWCGSSDD
51 YCSPSKNCQS NCKGGGGGGG GGGGSASNVL ATYHLYNPQQ HGWDLNAVSA
101 YCSTWDANKP YSWRSYGWT AFCGPVGAHG QPSCGKCLSV TNIGTGAKIT
151 VRIVDQCSNG GLDLDVNVFR QLDTDGKGYE RGHLTVNYQF VNCGDSFNPL
201 FSIMKSSVIN
```

Matched peptide information:

| Start - End | Observed  | Mr (expt) | Mr (calc) | ppm | Miss Sequence                                                                                                                                                                                        |
|-------------|-----------|-----------|-----------|-----|------------------------------------------------------------------------------------------------------------------------------------------------------------------------------------------------------|
| 117 - 136   | 2137.0835 | 2136.0762 | 2135.9306 | 68  | 0 K.YGWTAF <b>C</b> <b>G</b> <b>P</b> <b>V</b> <b>G</b> <b>A</b> <b>R</b> <b>G</b> <b>Q</b> <b>P</b> <b>S</b> <b>C</b> <b>G</b> <b>K</b> .C ( <a href="#">Ions score 101</a> )                       |
| 153 - 170   | 2021.1191 | 2020.1118 | 2019.9684 | 71  | 0 R.I <b>V</b> <b>D</b> <b>Q</b> <b>C</b> <b>S</b> <b>N</b> <b>O</b> <b>G</b> <b>L</b> <b>D</b> <b>L</b> <b>D</b> <b>V</b> <b>N</b> <b>V</b> <b>F</b> <b>R</b> .Q ( <a href="#">Ions score 156</a> ) |
| 171 - 181   | 1281.6837 | 1280.6764 | 1280.5997 | 60  | 1 R.Q <b>L</b> <b>D</b> <b>T</b> <b>D</b> <b>G</b> <b>R</b> <b>U</b> <b>E</b> <b>R</b> .G ( <a href="#">Ions score 51</a> )                                                                          |

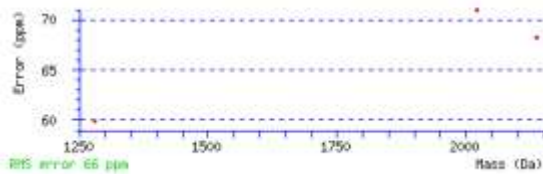



Spot No.: **49**

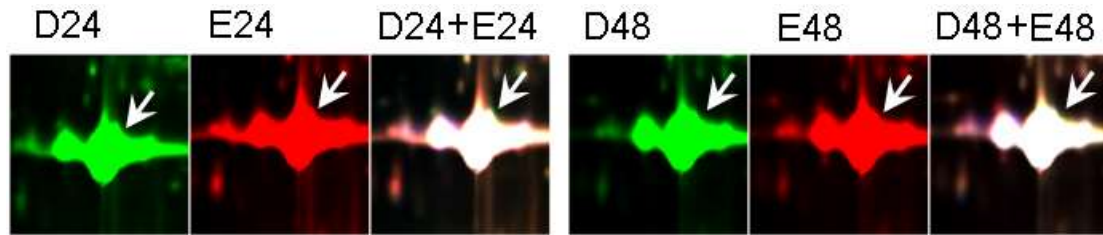

Accession No.: **scaffold1222\_60641.mRNA1**

Plant species: ***Hevea brasiliensis***

Protein name: **Small rubber particle protein**

**Peptide sequences:** **K.DISGPLKPGVDTIENVVK.T;**

**K.TVVTPVYYIPLEAVK.F; K.FVDKTVDVSVTSLDGVVPPVIK.Q;**

**K.TVDVSVTSLDGVVPPVIK.Q; K.QVSAQTYVAQDAPR.I;**

**R.IVLDVASSVENTGVQEGAK.A; K.ALYANLEPK.A; K.AEQYAVITWR.A;**

**R.ALNKLPLVPQVANVVVPTAVYFSEK.Y; K.LPLVPQVANVVVPTAVYFSEK.Y ;**

**K.LPLVPQVANVVVPTAVYFSEKYNDVVR.G; R.VSSYLPLLPTK.I**

PFF Mascot score: **[919]**

Sequence coverage %: **[74]**

Matched peptides No.: **[12]**

Calculated Mr: **22331**

Calculated pI: **4.80**

### **Annotated PFF spectra:**

Ions score is  $-10 \cdot \log(P)$ , where P is the probability that the observed match is a random event.

Individual ions scores  $> 31$  indicate identity or extensive homology ( $p < 0.05$ ).

Protein scores are derived from ions scores as a non-probabilistic basis for ranking protein hits.

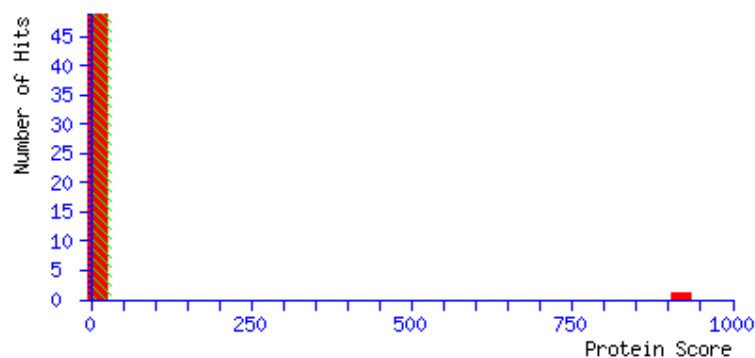

Matched peptide sequences: shown in **Bold Red**

```

1  MAEEVEEERL KYLDFVRAAG VYAVDSFSTL YLYAKDISGP LKPGVDTIEN
51 VVKTVVTPVY YIPLEAVKFV DKTVDVSVTS LDGVVPPVIK QVSAQTYSPA
101 QDAPRIVLDV ASSVFNTGVQ EGAKALYANL EPKAEQYAVI TWRALNKLPL
151 VPQVANVVVP TAVYFSEKYN DVVRGITEQG YRVSSYLPLL PTEKITKVFG
201 DEAS

```

Matched peptide information:

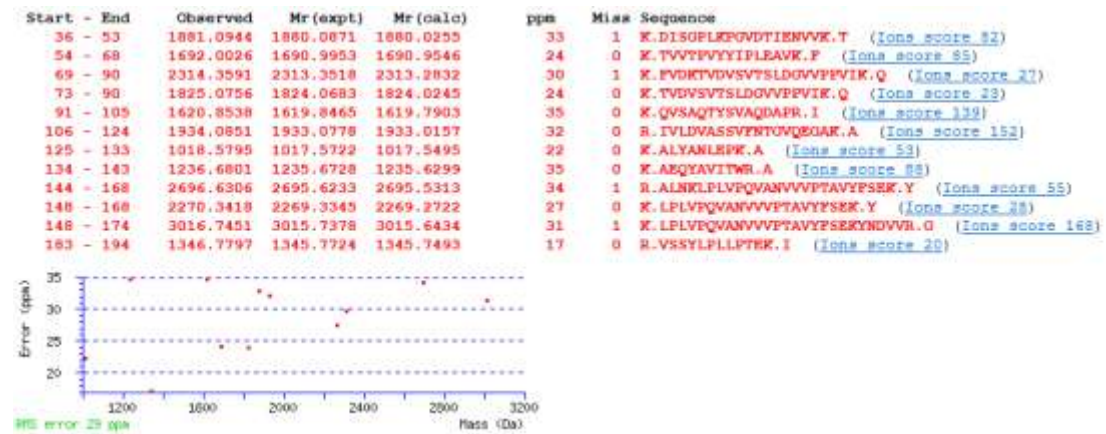

Spot No.: **50**

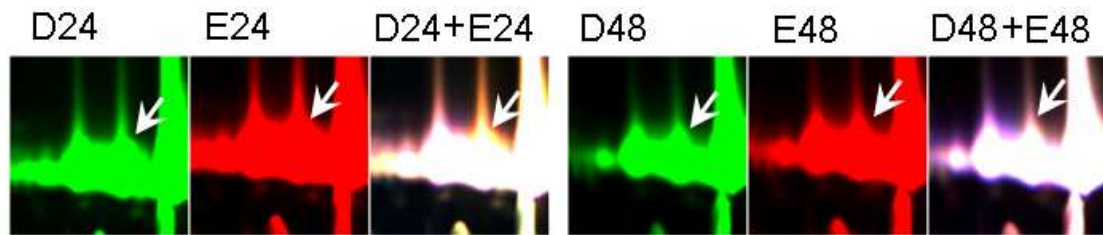

Accession No.: **scaffold1222\_136753.mRNA1**

Plant species: ***Hevea brasiliensis***

Protein name: **Rubber elongation factor protein**

**Peptide sequences:** **K.DKSGPLQPGVDIEGPVK.N ; K.NVAVPLYNR.F;**  
**K.FVDSTVVASVTIHDR.S; K.DASIQVVS AIR.A; R.SLASSLPGQTK.I**

PFF Mascot score: **[479]** Sequence coverage %: **[46]**

Matched peptides No.: **[5]**

Calculated Mr: **14713** Calculated pI: **5.04**

### Annotated PFF spectra:

Ions score is  $-10 \cdot \log(P)$ , where P is the probability that the observed match is a random event. Individual ions scores  $> 31$  indicate identity or extensive homology ( $p < 0.05$ ). Protein scores are derived from ions scores as a non-probabilistic basis for ranking protein hits.

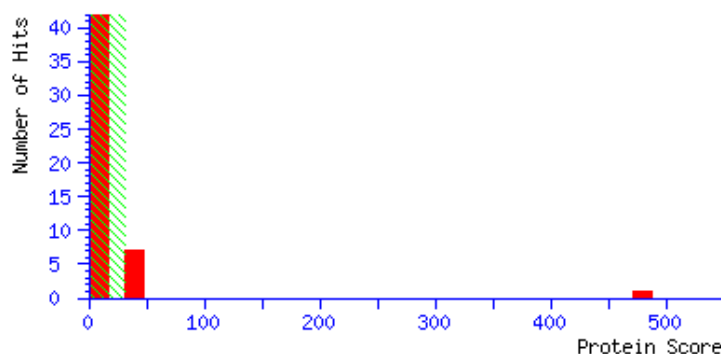

Matched peptide sequences: shown in **Bold Red**

```
1 MAEDEDNQGG QGEGLKYLGF VQDAATYAVT TFSNVYLFAK DKSGPLQPGV
51 DIIEGPKVKNV AVPLYNRFSY IPNGALKFVD STVVASVTII DRSLPPIVKD
101 ASIQVVSAIR AAPEAARSLA SSLPGQTKIL AKVIFYGEN
```

Matched peptide information:

| Start - End | Observed  | Mr(expt)  | Mr(calc)  | ppm | Miss | Sequence                                                  |
|-------------|-----------|-----------|-----------|-----|------|-----------------------------------------------------------|
| 41 - 58     | 1849.0110 | 1848.0037 | 1847.9993 | 2   | 1    | K.DKSGPLQPGVDIIEGPKV.N ( <a href="#">Ions score 142</a> ) |
| 59 - 67     | 1045.5704 | 1044.5631 | 1044.5716 | -8  | 0    | K.NVAVPLYNR.F ( <a href="#">Ions score 58</a> )           |
| 78 - 92     | 1621.8785 | 1620.8712 | 1620.8723 | -1  | 0    | K.FVDSTVVASVTIIDR.S ( <a href="#">Ions score 139</a> )    |
| 100 - 110   | 1158.6448 | 1157.6375 | 1157.6404 | -3  | 0    | K.DASIQVVSAR.A ( <a href="#">Ions score 110</a> )         |
| 118 - 128   | 1088.5717 | 1087.5644 | 1087.5873 | -21 | 0    | R.SLASSLPGQTK.I ( <a href="#">Ions score 30</a> )         |

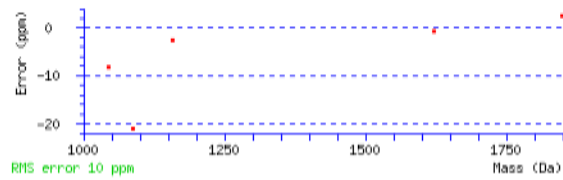

Spot No.: **51**

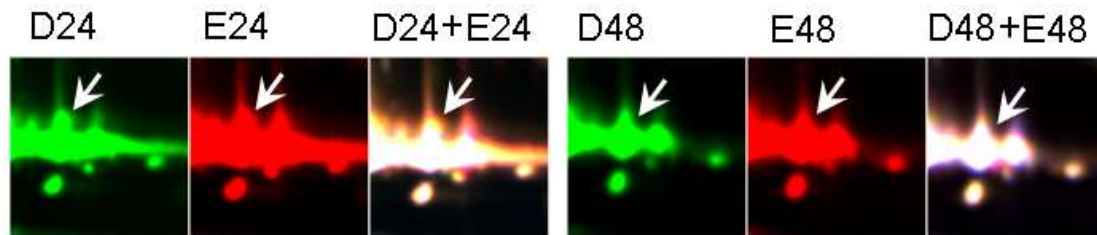

Accession No.: **scaffold1222\_136753.mRNA1**

Plant species: ***Hevea brasiliensis***

Protein name: **Rubber elongation factor protein**

**Peptide sequences:** **K.YLGFVQDAATYAVTTFSNVYLEAK.D;**  
**K.DKSGPLQPGVDIEGPVK.N; K.NVAVPLYNR.F; K.FVDSTVVASVTIHDR.S;**  
**K.DASIQVVS AIR.A; R.SLASSLPGQTK.I**

PFF Mascot score: **[560]** Sequence coverage %: **[63]**

Matched peptides No.: **[6]**

Calculated Mr: **14713** Calculated pI: **5.04**

### Annotated PFF spectra:

Ions score is  $-10 \cdot \log(P)$ , where P is the probability that the observed match is a random event. Individual ions scores  $> 31$  indicate identity or extensive homology ( $p < 0.05$ ). Protein scores are derived from ions scores as a non-probabilistic basis for ranking protein hits.

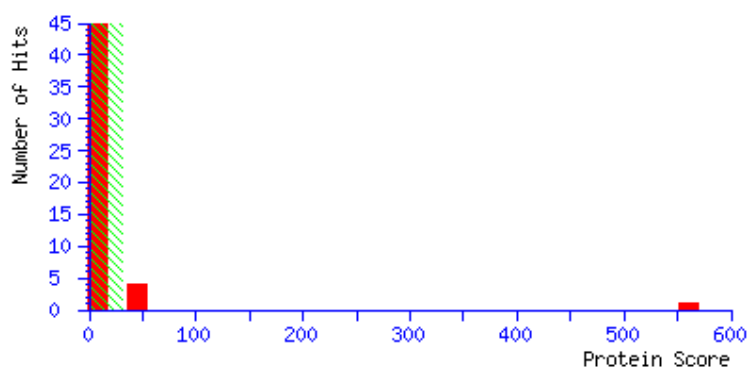

Matched peptide sequences: shown in **Bold Red**

1 MAEDEDNQQG QGEG**LKYLGF VQDAATYAVT TFSNVYLEAK DKS**GPLQPGV  
 51 **DIIEG**PVK**NV AVPLYNR**FSY IPNGALK**FVD STVVASVTII** DRSLPPIVKD  
 101 **ASIQV**SAIR AAPEAAR**SLA SSLPGQTK**IL AKVIFYGEN

Matched peptide information:

| Start - End | Observed  | Mr(expt)  | Mr(calc)  | ppm | Miss Sequence                                           |
|-------------|-----------|-----------|-----------|-----|---------------------------------------------------------|
| 17 - 40     | 2689.3093 | 2688.3020 | 2688.3476 | -17 | 0 K.YLG <b>FVQDAATYAVT</b> TFSNVYLEAK.D (Ions score 88) |
| 41 - 58     | 1848.9688 | 1847.9619 | 1847.9993 | -20 | 1 K.DKS <b>GPLQPGVDIIEG</b> PVK.N (Ions score 147)      |
| 59 - 67     | 1045.5529 | 1044.5456 | 1044.5716 | -25 | 0 K.NVAVFLY <b>NR.F</b> (Ions score 41)                 |
| 78 - 92     | 1621.8500 | 1620.8427 | 1620.8723 | -18 | 0 K.FVD <b>STVVASVTIIR.S</b> (Ions score 118)           |
| 100 - 110   | 1158.6237 | 1157.6164 | 1157.6404 | -21 | 0 K.DAS <b>IQVVS</b> AIR.A (Ions score 110)             |
| 118 - 128   | 1088.5576 | 1087.5503 | 1087.5873 | -34 | 0 R.SLAS <b>SLPGQTK.I</b> (Ions score 53)               |

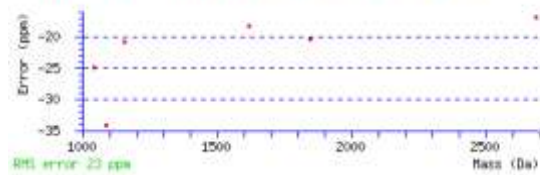

Spot No.: **52**

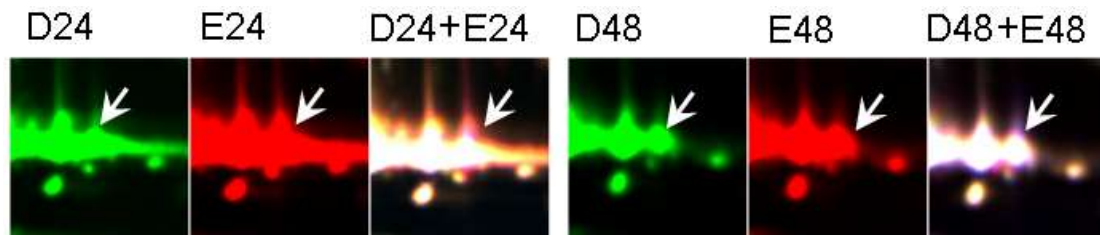

Accession No.: [scaffold1222\\_136753.mRNA1](#)

Plant species: *Hevea brasiliensis*

Protein name: **Rubber elongation factor protein**

**Peptide sequences:** **K.DKSGPLQPGVDIEGPVK.N; K.NVAVPLYNR.F;**  
**K.FVDSTVVASVTIHDR.S; K.DASIQVVS AIR.A; R.SLASSLPGQTK.I**

PFF Mascot score: [\[358\]](#) Sequence coverage %: [\[46\]](#)

Matched peptides No.: [\[5\]](#)

Calculated Mr: **14713** Calculated pI: **5.04**

### Annotated PFF spectra:

Ions score is  $-10 \cdot \log(P)$ , where P is the probability that the observed match is a random event.

Individual ions scores  $> 31$  indicate identity or extensive homology ( $p < 0.05$ ).

Protein scores are derived from ions scores as a non-probabilistic basis for ranking protein hits.

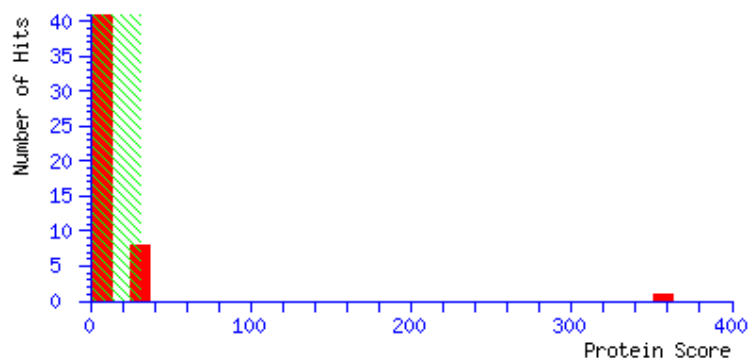

Matched peptide sequences: shown in **Bold Red**

1 MAEDEDNQGG QGEGLKYLGF VQDAATYAVT TFSNVYLFAK **DKSGPLQPGV**  
51 **DIIEGPVKNV** **AVPLYNRFSY** IPNGALK**FVD** **STVVASVTII** DRSLPPIVKD  
101 **ASIQVVS AIR** AAPEAAR**SLA** **SSLPGQTKIL** AKVIFYGEN

Matched peptide information:

| Start - End | Observed  | Mr(expt)  | Mr(calcd) | ppm | Miss | Sequence                                                 |
|-------------|-----------|-----------|-----------|-----|------|----------------------------------------------------------|
| 41 - 58     | 1849.0087 | 1848.0014 | 1847.9993 | 1   | 1    | K.DKSGPLQPGVDIIEGPVK.N ( <a href="#">Ions score 62</a> ) |
| 59 - 67     | 1045.5721 | 1044.5648 | 1044.5716 | -6  | 0    | K.NVAVPLYNR.F ( <a href="#">Ions score 63</a> )          |
| 78 - 92     | 1621.8833 | 1620.8760 | 1620.8723 | 2   | 0    | K.FVDSTVVASVTIIDR.S ( <a href="#">Ions score 125</a> )   |
| 100 - 110   | 1158.6415 | 1157.6342 | 1157.6404 | -5  | 0    | K.DASIQVVS AIR.A ( <a href="#">Ions score 97</a> )       |
| 118 - 128   | 1088.5811 | 1087.5738 | 1087.5873 | -12 | 0    | R.SLASSLPQGTK.I ( <a href="#">Ions score 10</a> )        |

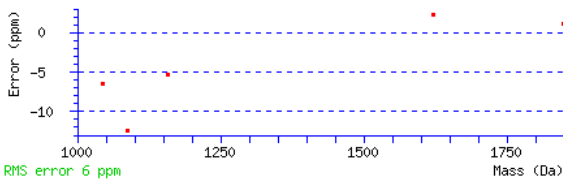



Spot No.: **53**

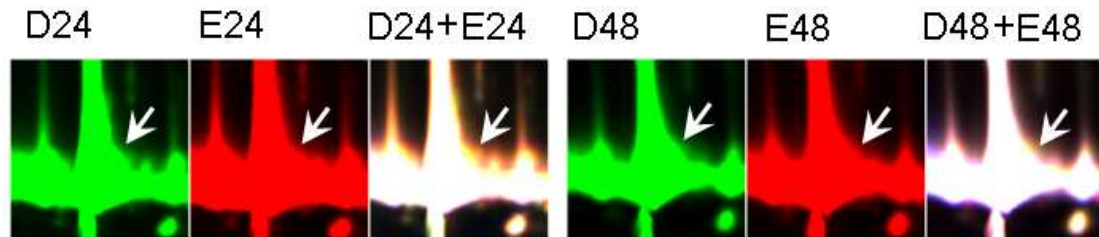

Accession No.: **scaffold1222\_136753.mRNA1**

Plant species: ***Hevea brasiliensis***

Protein name: **Rubber elongation factor protein**

**Peptide sequences:** **K.DKSGPLQPGVDIIEGPVK.N; K.NVAVPLYNR.F;  
K.FVDSTVVASVTIHDR.S; K.DASIQVVS AIR.A; R.SLASSLPGQTK.I**

PFF Mascot score: **[433]**      Sequence coverage %: **[46]**

Matched peptides No.: **[5]**

Calculated Mr: **14713**      Calculated pI: **5.04**

### **Annotated PFF spectra:**

Ions score is  $-10 \cdot \log(P)$ , where P is the probability that the observed match is a random event.

Individual ions scores  $> 31$  indicate identity or extensive homology ( $p < 0.05$ ).

Protein scores are derived from ions scores as a non-probabilistic basis for ranking protein hits.

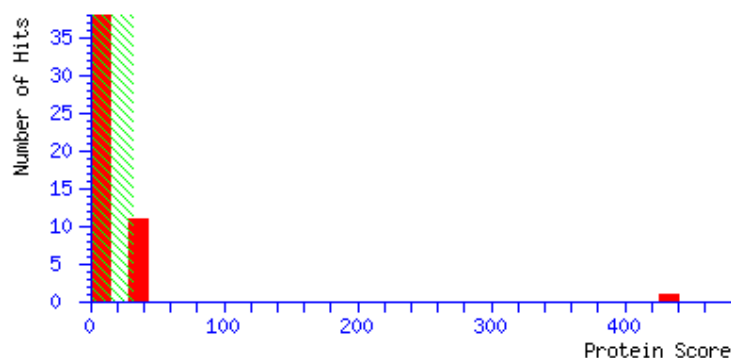

Matched peptide sequences: shown in **Bold Red**

1 MAEDEDNQGG QGEGCLKYLGF VQDAATYAVT TFSNVYLFAK **DKSGPLQPGV**  
51 **DIIEGPKVKNV** **AVPLYNR**FSY IPNGALK**FVD** **STVVASVTII** DRSLPPIVKD  
101 **ASIQVVS**AIR AAPEAAR**SLA** **SSLPGQTK**IL AKVIFYGEN

Matched peptide information:

| Start - End | Observed  | Mr(expt)  | Mr(calc)  | ppm | Miss | Sequence                                                            |
|-------------|-----------|-----------|-----------|-----|------|---------------------------------------------------------------------|
| 41 - 58     | 1848.9884 | 1847.9811 | 1847.9993 | -10 | 1    | K.DKSGPLQPGVD <b>DIIEGPKV</b> .N ( <a href="#">Ions score 132</a> ) |
| 59 - 67     | 1045.5653 | 1044.5580 | 1044.5716 | -13 | 0    | K.NVAVPLYNR. <b>F</b> ( <a href="#">Ions score 38</a> )             |
| 78 - 92     | 1621.8668 | 1620.8595 | 1620.8723 | -8  | 0    | K.FVDSTVVASVTIIDR. <b>S</b> ( <a href="#">Ions score 146</a> )      |
| 100 - 110   | 1158.6339 | 1157.6266 | 1157.6404 | -12 | 0    | K.D <b>ASIQVVS</b> AIR.A ( <a href="#">Ions score 114</a> )         |
| 118 - 128   | 1088.5704 | 1087.5631 | 1087.5873 | -22 | 0    | R.SLASS <b>LPGQTK</b> .I ( <a href="#">Ions score 3</a> )           |

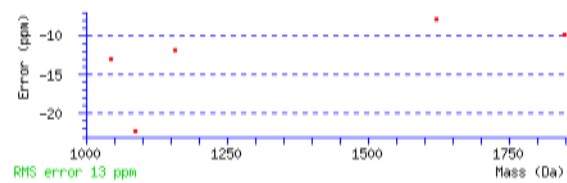

Spot No.: **54**

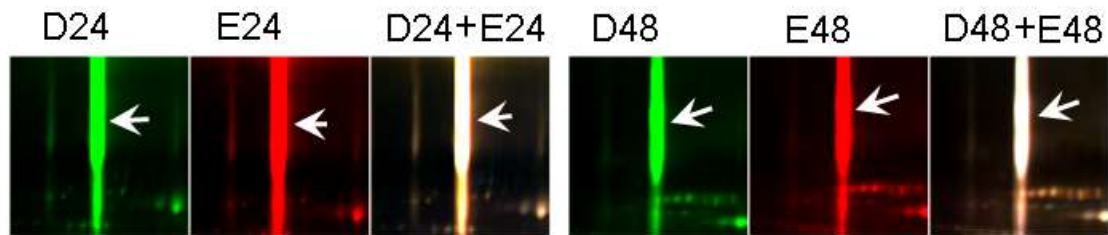

Accession No.: **scaffold1222\_136753.mRNA1**

Plant species: ***Hevea brasiliensis***

Protein name: **Rubber elongation factor protein**

**Peptide sequences:** **K.DKSGPLQPGVDIEGPVK.N; K.NVAVPLYNR.F;**  
**K.FVDSTVVASVTIHDR.S; K.DASIQVVS AIR.A;**  
**K.YLGFVQDAATYAVTTFSNVYLEAK.D**

PFF Mascot score: **[654]** Sequence coverage %: **[55]**

Matched peptides No.: **[5]**

Calculated Mr: **14713** Calculated pI: **5.04**

### **Annotated PFF spectra:**

Ions score is  $-10 \cdot \log(P)$ , where P is the probability that the observed match is a random event. Individual ions scores  $> 31$  indicate identity or extensive homology ( $p < 0.05$ ). Protein scores are derived from ions scores as a non-probabilistic basis for ranking protein hits.

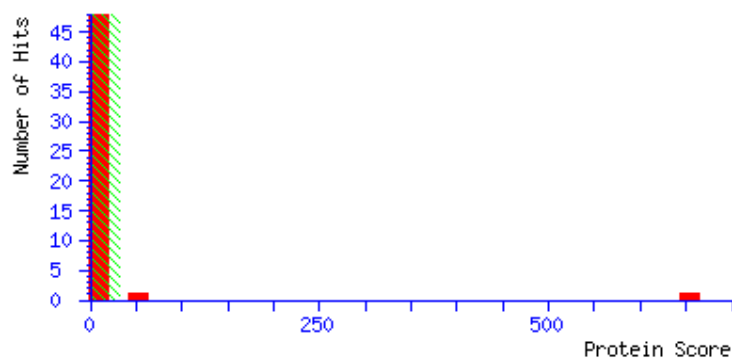

Matched peptide sequences: shown in **Bold Red**

1 MAEDEDNQQG QGEG**LKYLGF VQDAATYAVT TFSNVYLEAK** DKSGPLQPGV  
51 **DIIEGPKVKNV AVPLYNRFSY** IPNGALKFVD **STVVASVTII** DRSLPPIVKD  
101 **ASIQVVS**AIR AAPEAARSLA SSLPGQTKIL AKVIFYGEN

Matched peptide information:

| Start - End | Observed  | Mr(expt)  | Mr(calc)  | ppm | Miss | Sequence                                               |
|-------------|-----------|-----------|-----------|-----|------|--------------------------------------------------------|
| 17 - 40     | 2689.2146 | 2688.2073 | 2688.3476 | -52 | 0    | K.YLG <b>FVQDAATYAVT</b> TFSNVYLEAK.D (ions score 192) |
| 41 - 58     | 1848.9199 | 1847.9126 | 1847.9993 | -47 | 1    | K.DKSGPLQPGVD <b>IIIEGPKV</b> .N (ions score 141)      |
| 59 - 67     | 1045.5411 | 1044.5338 | 1044.5716 | -36 | 0    | K.NVAVPLYNR.F (ions score 72)                          |
| 78 - 92     | 1621.8131 | 1620.8058 | 1620.8723 | -41 | 0    | K.FVDSTVVASVTI <b>DR</b> .S (ions score 132)           |
| 100 - 110   | 1158.6027 | 1157.5954 | 1157.6404 | -39 | 0    | K.D <b>ASIQVVS</b> AIR.A (ions score 109)              |

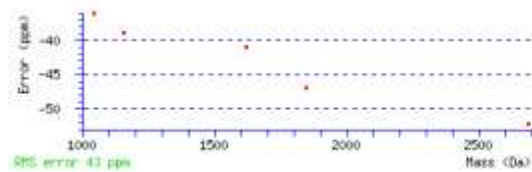

Spot No.: **55**

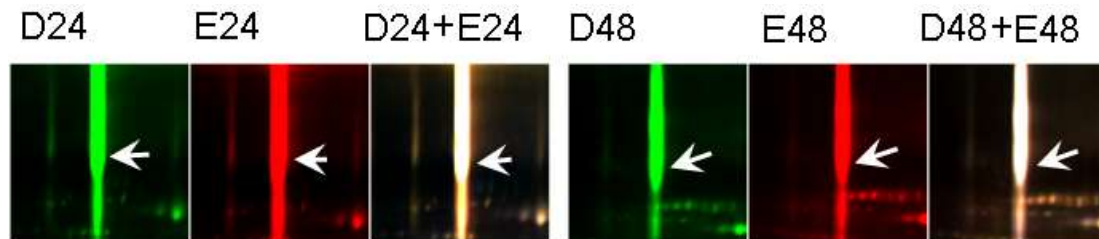

Accession No.: **scaffold1222\_136753.mRNA1**

Plant species: ***Hevea brasiliensis***

Protein name: **Rubber elongation factor protein**

**Peptide sequences:** **K.DKSGPLQPGVDIEGPVK.N; K.NVAVPLYNR.F;**  
**K.FVDSTVVASVTIHDR.S; K.DASIQVVS AIR.A;**  
**K.YLGFVQDAATYAVTTFSNVYLEAK.D**

PFF Mascot score: **[611]** Sequence coverage %: **[55]**

Matched peptides No.: **[5]**

Calculated Mr: **14713** Calculated pI: **5.04**

### **Annotated PFF spectra:**

Ions score is  $-10 \cdot \log(P)$ , where P is the probability that the observed match is a random event.  
Individual ions scores  $> 31$  indicate identity or extensive homology ( $p < 0.05$ ).  
Protein scores are derived from ions scores as a non-probabilistic basis for ranking protein hits.

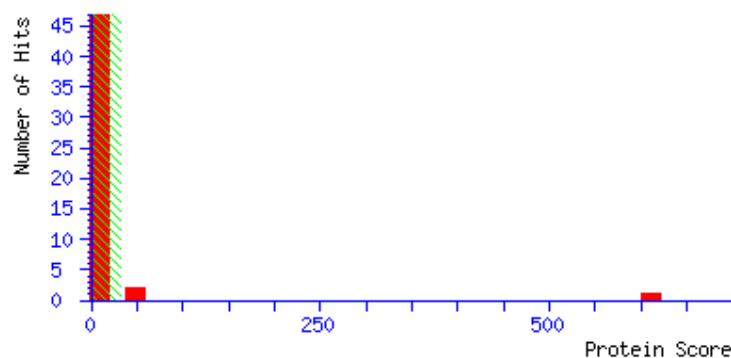

Matched peptide sequences: shown in **Bold Red**

```
1 MAEDEDNQQG QGEGLYLGF VQDAATYAVT TFSNVYLEAK DKSGPLQPGV
51 DIIEGPVKNV AVPLYNRFSY IPNGALKFVD STVVASVTII DRSLPPIVKD
101 ASIQVVSAIR AAPEAARSLA SSLPGQTKIL AKVFYGEN
```

Matched peptide information:

| Start - End | Observed  | Mr (expt) | Mr (calc) | ppm | Miss | Sequence                                      |
|-------------|-----------|-----------|-----------|-----|------|-----------------------------------------------|
| 17 - 40     | 2689.2560 | 2688.2495 | 2688.3476 | -36 | 0    | K.YLGFVQDAATYAVTTFSNVYLEAK.D (Ions score 180) |
| 41 - 58     | 1848.9453 | 1847.9380 | 1847.9993 | -33 | 1    | K.DKSGPLQPGVDIIEGPK.N (Ions score 121)        |
| 59 - 67     | 1045.5551 | 1044.5478 | 1044.5716 | -23 | 0    | K.NVAVPLYMR.P (Ions score 64)                 |
| 78 - 92     | 1621.8289 | 1620.8216 | 1620.8723 | -31 | 0    | K.FVDSTVVASVTIIDR.S (Ions score 137)          |
| 100 - 110   | 1158.6204 | 1157.6131 | 1157.6404 | -24 | 0    | K.DASIQVVSAR.A (Ions score 109)               |

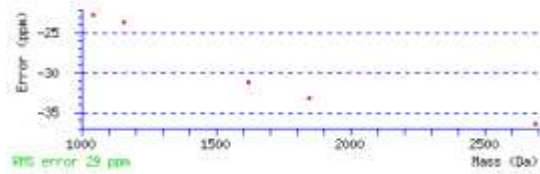

Spot No.: **56**

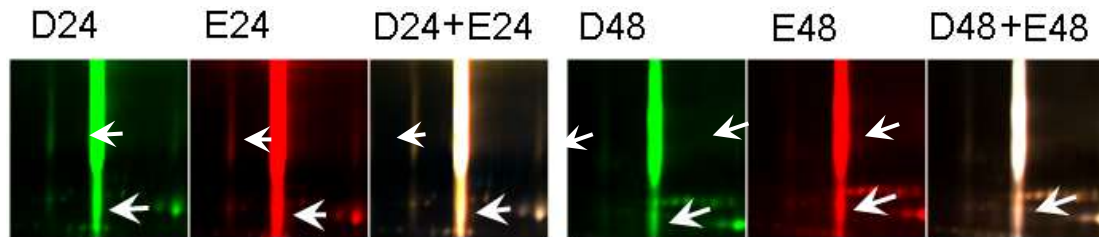

Accession No.: **scaffold1222\_136753.mRNA1**

Plant species: ***Hevea brasiliensis***

Protein name: **Rubber elongation factor protein**

**Peptide sequences:** **K.SGPLQPGVDIIEGPVK.N; K.NVAVPLYNR.F;**  
**K.FVDSTVVASVTIHDR.S; K.DASIQVVS AIR.A**

PFF Mascot score: **[220]**      Sequence coverage %: **[36]**

Matched peptides No.: **[4]**

Calculated Mr: **14713**      Calculated *pI*: **5.04**

### Annotated PFF spectra:

Ions score is  $-10 \cdot \log(P)$ , where *P* is the probability that the observed match is a random event.

Individual ions scores > 32 indicate identity or extensive homology ( $p < 0.05$ ).

Protein scores are derived from ions scores as a non-probabilistic basis for ranking protein hits.

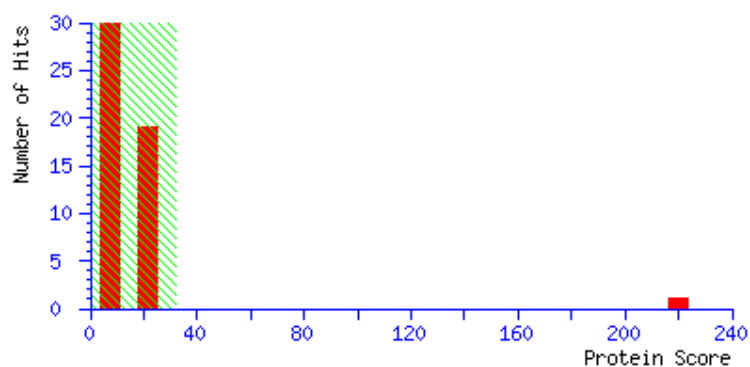

Matched peptide sequences: shown in **Bold Red**

```

1 MAEDEDNQOG QGEGCLKYLGF VQDAATYAVT TFSNVYLFAK DKSGPLQPGV
51 DIIEGPKNV AVPLYNRFSY IPNGALKFVD STVVASVTII DRSLPPIVKD
101 ASIQVVSAIR AAPEAARSLA SSLPGQTKIL AKVIFYGEN

```

Matched peptide information:

| Start - End | Observed  | Mr(expt)  | Mr(calc)  | ppm | Miss | Sequence                                                        |
|-------------|-----------|-----------|-----------|-----|------|-----------------------------------------------------------------|
| 43 - 58     | 1605.8586 | 1604.8513 | 1604.8774 | -16 | 0    | K.SGPLQPGVD <b>DIIEGPK</b> .N ( <a href="#">Ions score 53</a> ) |
| 59 - 67     | 1045.5825 | 1044.5752 | 1044.5716 | 3   | 0    | K.NVAVPLYN <b>R.F</b> ( <a href="#">Ions score 39</a> )         |
| 78 - 92     | 1621.8805 | 1620.8732 | 1620.8723 | 1   | 0    | K.FVDSTVVASVT <b>IIDR.S</b> ( <a href="#">Ions score 81</a> )   |
| 100 - 110   | 1158.6493 | 1157.6420 | 1157.6404 | 1   | 0    | K.DASIQVVS <b>AIR.A</b> ( <a href="#">Ions score 47</a> )       |

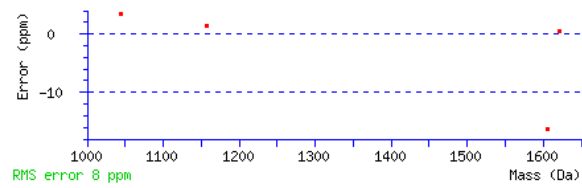



Spot No.: **57**

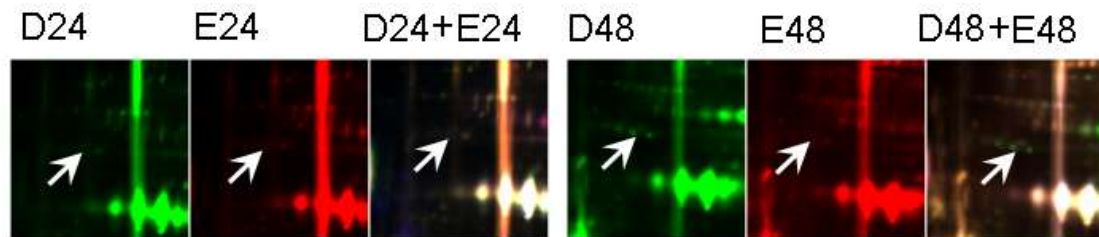

Accession No.: **scaffold1535\_19427.mRNA1**

Plant species: ***Hevea brasiliensis***

Protein name: **Serine/threonine-protein phosphatase 2A 65 kDa  
regulatory subunit A beta isoform**

**Peptide sequences:** **R.LAAGEWFTAR.V; K.TDIMSIFEDLTQDDQDSVR.L;  
K.LLEPQDCVAHILPVIVNFSQDK.S; R.YMVANQLYELCEAVGPELTSSDLVPAYVR.L;  
R.ILNPELAIQR.I; K.LDQVNQVIGIDLLSQSLLPAIVELAEDR.H**

PFF Mascot score: **[621]** Sequence coverage %: **[20]**

Matched peptides No.: **[6]**

Calculated Mr: **66211** Calculated pI: **4.84**

### Annotated PFF spectra:

Ions score is  $-10 \cdot \log(P)$ , where P is the probability that the observed match is a random event.  
Individual ions scores  $> 30$  indicate identity or extensive homology ( $p < 0.05$ ).  
Protein scores are derived from ions scores as a non-probabilistic basis for ranking protein hits.

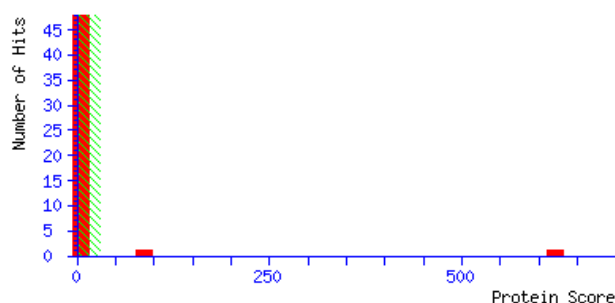

Matched peptide sequences: shown in **Bold Red**

```

1 MATIDEPLYP IAVLIDELKN EDIQLRLNSI RKLSTIARAL GEERTRKELI
51 PFLSENND DD DEVLIAMAE LGVFIPYIGG VEHANVLLPP LETLCTVEET
101 CVRDKAVESL CRIGVQIREQ DLVEYFIPLV KRLAAGEWFT ARVSSCGLFH
151 IAYPSAPETL KTELRAIYSQ LCQDDMPMVR RSAATNLGKF AATIEPAHLK
201 TDIMSIFEDL TQDDQDSVRL LAVEGCAALG KLLEPQDCVA HILPVIVNFS
251 QDKSWRVRYM VANQLYELCE AVGPELTSSD LVPAYVRLLC DNEAEVRIAA
301 AGKVTKFCRI LNPELAIQRI IPCVKELSTD SSQHVRSA LA SVIMGMAPIL
351 GKDATIEQLL PIFLSLLKDE FPDVRLNIIS KLDQVNQVIG IDLLSQSLLP
401 AIVELAEDRH WRVRLAII EY VPLLASQLGV GFFDDKLGAL CMQWLKDKVY
451 SIRDAAANNV KRLAE EFGPD WAMQHIVPQV LDMINNPHYL YRMTILHAIS
501 LLAPVMGSEI TCSTLLPVVV NTSKDRVPNI KFNVA KVLS LIPIVDQSVV
551 DKTIRPCLVE LSEDPDV DVR FFATQALQSS DQVMMST

```

Matched peptide information:

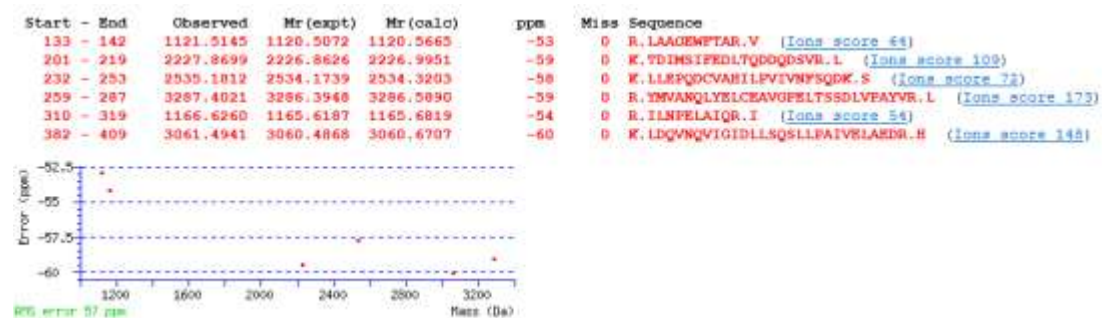

Spot No.: **58**

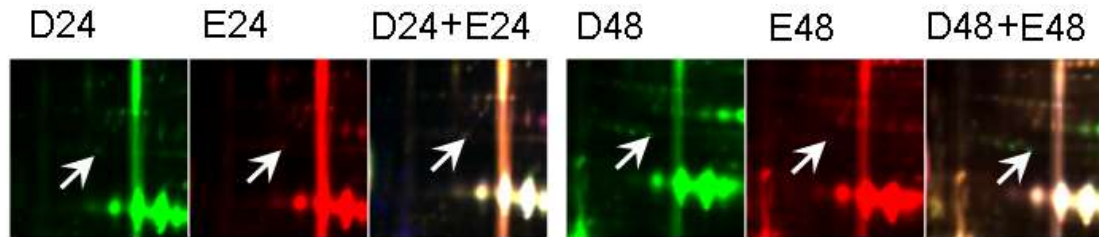

Accession No.: **scaffold0199\_1207598.mRNA1**

Plant species: ***Hevea brasiliensis***

Protein name: **Ubiquitin receptor RAD23c**

**Peptide sequences:** **R.AAYNNPER.A; R.NSQQFQALR.A;**  
**R.LIQEHQADFLR.M**

PFF Mascot score: **[154]**      Sequence coverage %: **[7]**

Matched peptides No.: **[3]**

Calculated Mr: **40862**      Calculated *pI*: **4.71**

### Annotated PFF spectra:

Ions score is  $-10 \cdot \log(P)$ , where  $P$  is the probability that the observed match is a random event.

Individual ions scores  $> 32$  indicate identity or extensive homology ( $p < 0.05$ ).

Protein scores are derived from ions scores as a non-probabilistic basis for ranking protein hits.

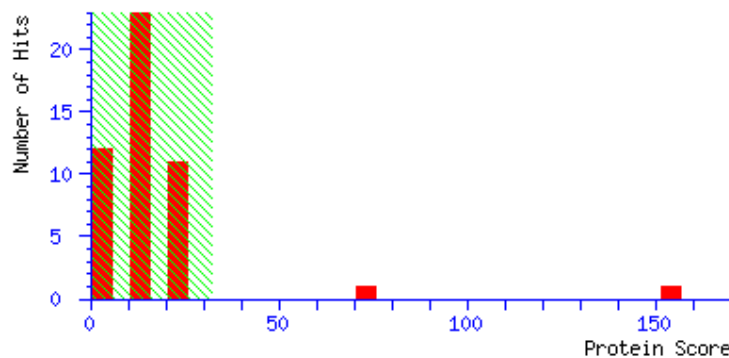

Matched peptide sequences: shown in **Bold Red**

```

1 MKVYVKILKG TNFEIEVKLE DTVADVKKII ETIQGVDIYP AAQOMLIHQG
51 KVLKDGITLE ESKVAENFSI VVMLSLSKVS SGGTSTASAA PPSQAQPASS
101 LPSSATRPST TTQASAPTAA PLQPAIESTP AVVNPVSSES DIYGQAASNL
151 VAGSNLEATI QQILDMGGGS WDHETVVRAL RAAYNNPERA VEYLYSGIPE
201 QAEARPVAQV PASGQAANPP AQAEQPAAPT SDGPNANPLD LFPQGLPSMG
251 SNASAGTLDF LRNSQQFQAL RAMVQANPQI LQPMLQELGK QNPHLVRLIQ
301 EHQADFLRMI NEPVEGEGNP LSQLASAMPQ AVTVTPERE AIERLEAMGF
351 DRALVLEVFF ACNKNEELAA NYLLDHIHEF EE

```

Matched peptide information:

| Start - End | Observed  | Mr (expt) | Mr (calc) | ppm | Miss | Sequence               |                                   |
|-------------|-----------|-----------|-----------|-----|------|------------------------|-----------------------------------|
| 182 - 189   | 934.4064  | 933.3992  | 933.4304  | -33 | 0    | <b>R.AAYNNPER.A</b>    | ( <a href="#">Ions score 23</a> ) |
| 263 - 271   | 1091.5298 | 1090.5225 | 1090.5519 | -27 | 0    | <b>R.NSQQFQALR.A</b>   | ( <a href="#">Ions score 48</a> ) |
| 298 - 308   | 1369.6824 | 1368.6751 | 1368.7150 | -29 | 0    | <b>R.LIQEHQADFLR.M</b> | ( <a href="#">Ions score 83</a> ) |

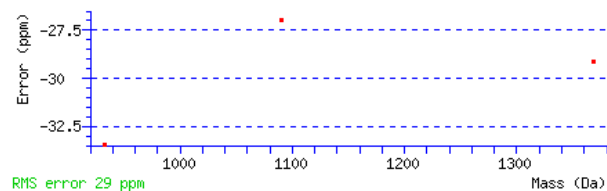

Spot No.: **59**

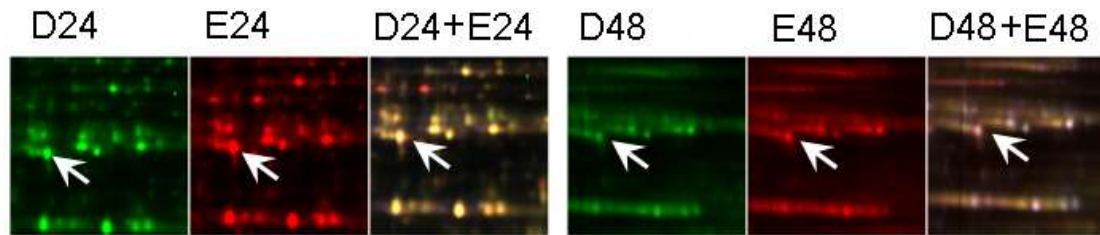

Accession No.: **scaffold0172\_1138898.mRNA1**

Plant species: ***Hevea brasiliensis***

Protein name: **Guanosine nucleotide diphosphate dissociation inhibitor 2**

**Peptide sequences:** **K.YGLDDNTVDFIGHSLALHR.D;**  
**R.FQGGSPYIYPLYGLGELPQAFAR.L; K.VVCDPSYLPNK.V;**  
**R.AIAIMSHPIPNTNDSHSVQVILPQK.Q; R.RSDMYLFCCSYTHNVAPK.G;**  
**R.SDMYLFCCSYTHNVAPK.G**

PFF Mascot score: **[497]** Sequence coverage %: **[21]**

Matched peptides No.: **[6]**

Calculated Mr: **50142** Calculated pI: **5.54**

### Annotated PFF spectra:

Ions score is  $-10 \cdot \log(P)$ , where P is the probability that the observed match is a random event.  
Individual ions scores  $> 30$  indicate identity or extensive homology ( $p < 0.05$ ).  
Protein scores are derived from ions scores as a non-probabilistic basis for ranking protein hits.

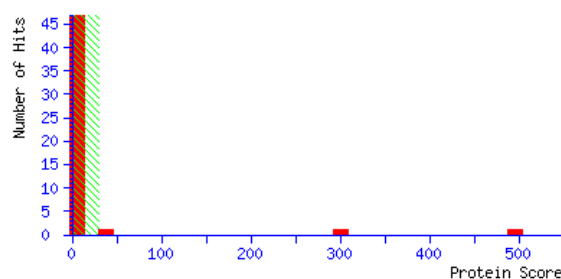

Matched peptide sequences: shown in **Bold Red**

```

1 MDEEYDVIVL GTGLKECILS GLLSVDGLKV LHMDRNDYYG GESASLNLIQ
51 LWKRFRGNDK PPAHLGSSRD YNVDMIPKFM MANGNLVRVL IHTDVTKYLY
101 FKAVDGSFVY NKGKVHKVPA TDIEALKSPL MGIFEKRRAR KFFIYVQDYN
151 ENDPKTHEGM DLTRVTTREL IAKYGLDDNT VDFIGHSLAL HRDDQYLDEP
201 ALDTVMRMKL YAESLARFQG GSPYIYPLYG LGELPQAFAR LSAVYGGTYM
251 LNKPECKVEF NEEGKVVGVV SEGETARCKK VVCDPSYLPN KVRKVGRVAR
301 AIAIMSHPIP NTNDSHSVQV ILPQKQLGRR SDMYLFCCSY THNVAPKGKY
351 IAFVSSEAEI DHPEVELKPG IDLLGPVDEI FFEIYDRYEP VNEPSLDNCF
401 ISTSYDATTH FESTVTDVLN MYTLITGKVL DLSVDLSAAS AAE

```

Matched peptide information:

| Start - End | Observed  | Mr (expt) | Mr (calc) | ppm | Miss Sequence                                   |
|-------------|-----------|-----------|-----------|-----|-------------------------------------------------|
| 174 - 192   | 2142.9622 | 2141.9549 | 2142.0494 | -44 | D K.YGLDDNTVDFIGHSLALNR.D (Ions score 117)      |
| 218 - 240   | 2544.1755 | 2543.1682 | 2543.2849 | -46 | D R.FQGCSFYIYPLYGLGELPQAFAR.L (Ions score 182)  |
| 281 - 291   | 1291.5847 | 1290.5774 | 1290.6278 | -39 | D K.VVCDPSYLPNK.V (Ions score 52)               |
| 301 - 325   | 2710.3091 | 2709.3018 | 2709.4272 | -46 | D R.AIAIMSHPIPNTNDSHSVQVILPQK.Q (Ions score 79) |
| 330 - 347   | 2248.8921 | 2247.8848 | 2247.9864 | -45 | I R.RSDMYLFCCSYTHNVAPK.G (Ions score 39)        |
| 331 - 347   | 2092.8501 | 2091.8428 | 2091.8853 | -20 | D R.SDMYLFCCSYTHNVAPK.G (Ions score 31)         |

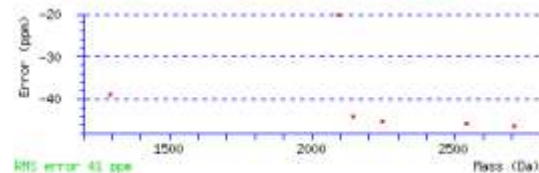

Spot No.: **60**

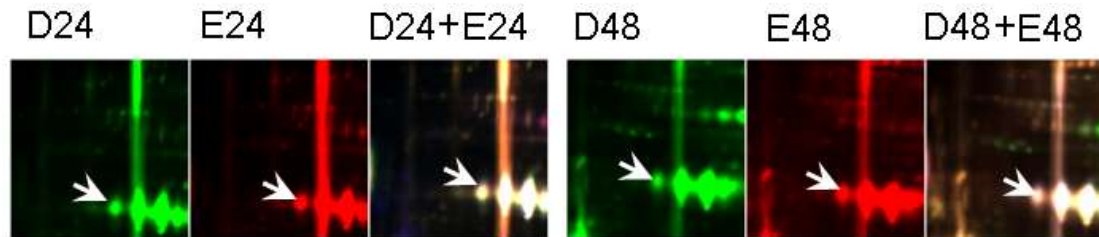

Accession No.: **scaffold0560\_404767.mRNA1**

Plant species: ***Hevea brasiliensis***

Protein name: **Metacaspase-4**

**Peptide sequences:** **R.SAEPGDLLFVHYSGHGTRL.L; R.EFVDQVPHGCR.I; K.QTIQDAFESR.G; R.GVHLPSDLHHHHGHR.D; K.LRPTLFDMFGDDASPK.V**

PFF Mascot score: **[346]** Sequence coverage %: **[16]**

Matched peptides No.: **[5]**

Calculated Mr: **46443** Calculated pI: **5.01**

### Annotated PFF spectra:

Ions score is  $-10 \cdot \log(P)$ , where P is the probability that the observed match is a random event. Individual ions scores  $> 31$  indicate identity or extensive homology ( $p < 0.05$ ). Protein scores are derived from ions scores as a non-probabilistic basis for ranking protein hits.

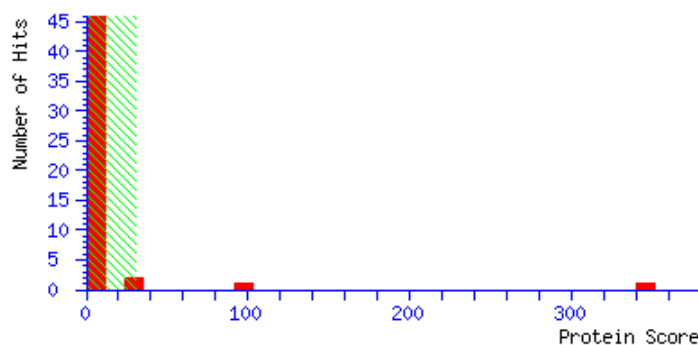

Matched peptide sequences: shown in **Bold Red**

```

1  MAKKAVLIGI NYPGTKAELK GCINDVKRMY RCLVDRYGFS EEDITVLIDI
51  DESYIQPTGK NIRRVLTDLV RSAEPGDLIF VHYSGHGTRL PAETGEDDDT
101 GFDECIVPCD MNLITDDDFR EFVDQVPHGC RITVVSDSCH SGGLIDEAKE
151 QIGESTKRKE EESGSGFGFK SFLKQTIQDA FESRGVHLPS DLHHHHGHRD
201 EEDFDNRVVE EDYGDSGYVK SKSLPLSTLI EILKQKTGKD DIDVGKLRPT
251 LFDMPGDDAS PKVKKFMKVI LNKLRHGDGE SGGGGFLGMV GSLAQEFLKH
301 KLDENDESIV KPALETEVDS KQEVYAGKTK RSLPDGGILI SGCQTDQISA
351 DASPSGKSSE AYGALSNAIQ TIIAETDGAV TNQELVLKAR KMLKKQGFTQ
401 KPGLYCSDDH VEASFVC

```

Matched peptide information:

| Start - End | Observed  | Mr(expt)  | Mr(calc)  | ppm | Miss | Sequence                                                  |
|-------------|-----------|-----------|-----------|-----|------|-----------------------------------------------------------|
| 72 - 89     | 1942.8282 | 1941.8209 | 1941.9333 | -58 | 0    | R.SAEPGDLLFVHYSGHGTR.L ( <a href="#">Ions score 125</a> ) |
| 121 - 131   | 1343.5459 | 1342.5386 | 1342.6088 | -52 | 0    | R.EFVDQVPHGCR.I ( <a href="#">Ions score 67</a> )         |
| 175 - 184   | 1194.5095 | 1193.5022 | 1193.5677 | -55 | 0    | K.QTIQDAFESR.G ( <a href="#">Ions score 75</a> )          |
| 185 - 199   | 1735.7604 | 1734.7531 | 1734.8564 | -60 | 0    | R.GVHLPSDLHHHHGHR.D ( <a href="#">Ions score 47</a> )     |
| 247 - 262   | 1809.7789 | 1808.7716 | 1808.8767 | -58 | 1    | K.LRPTLFDMPGDDASPK.V ( <a href="#">Ions score 32</a> )    |

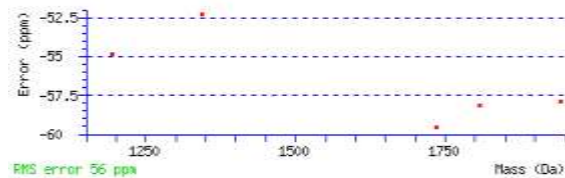



Spot No.: **61**

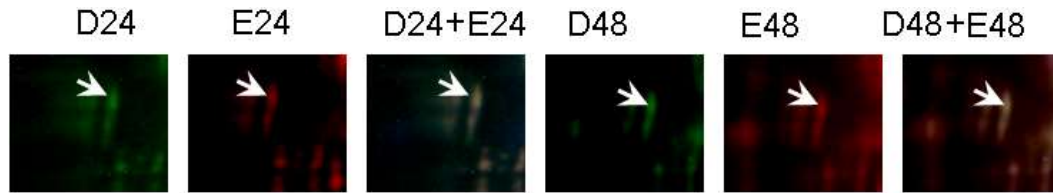

Accession No.: **scaffold0233\_1484662.mRNA1**

Plant species: ***Hevea brasiliensis***

Protein name: **26S proteasome non-ATPase regulatory subunit**

**4 homolog**

**Peptide sequences:** **M.VLEATMICIDNSEWMR.N;**

**R.FQAQADAVNLCGAK.T; R.IIVFAGSPIK.H;**

**R.NDLTDEENALLQQALAMSMDEPASSHEL.R.D**

PFF Mascot score: **[231]**

Sequence coverage %: **[17]**

Matched peptides No.: **[4]**

Calculated Mr: **42727**

Calculated pI: **4.57**

### **Annotated PFF spectra:**

Ions score is  $-10 \cdot \log(P)$ , where P is the probability that the observed match is a random event.

Individual ions scores  $> 31$  indicate identity or extensive homology ( $p < 0.05$ ).

Protein scores are derived from ions scores as a non-probabilistic basis for ranking protein hits.

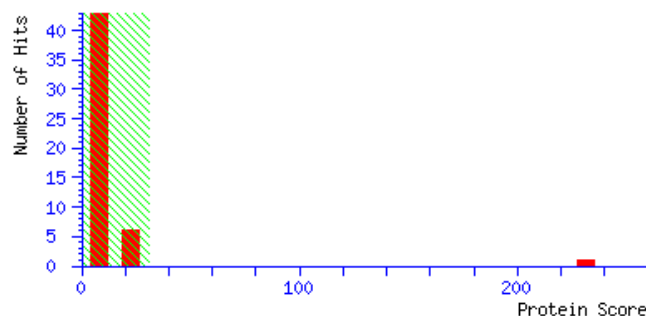

Matched peptide sequences: shown in **Bold Red**

```

1  MVLEATMICI DNSEWMRNGD YSPSRFQAQA DAVNLICGAK TQSNPENTVG
51 VLTMAGKGVR VLVTPTSDLG KILACMHGLE IGGEMNLAAG IQVAQLALKH
101 RQNKKQQQRI IVFAGSPIKH DKKTLEMIGR KLKKSNVALD IVDFGEEEDG
151 KAEKLEALLA AVNTNDTSHI VHVPPGPNAL SDVLISTPIF TGDGEGGSGF
201 AAAAAAAAAAG GVSGFEFGVD PNLDPELALA LRVSMEEEERA RQEAAAKKAA
251 EEGSKQEKGG EQPSSSQDAT MTESASVAAS EADNKRNDLT DEENALLQQA
301 LAMSMDEPAS SHELRDTDMS EAAADDPDLA LALQLSVQDS TKDSGSQIDM
351 SKLLADQSFV SSILASLPGV DPNDPSVKDL LASMQSQSEP PEKKDEDKPK
401 EEK

```

Matched peptide information:

| Start - End | Observed  | Mr (expt) | Mr (calc) | ppm | Miss | Sequence                                                                     |
|-------------|-----------|-----------|-----------|-----|------|------------------------------------------------------------------------------|
| 2 - 17      | 1967.8317 | 1966.8244 | 1966.8951 | -36 | 0    | M.VLEATM <b>ICI</b> DNSEWM <b>R</b> .N (ions score 72)                       |
| 26 - 40     | 1605.7445 | 1604.7372 | 1604.7981 | -38 | 0    | R.FQAQADAVN <b>LIC</b> AK.T (ions score 80)                                  |
| 110 - 119   | 1044.6050 | 1043.5977 | 1043.6379 | -39 | 0    | R.IIVFAGS <b>PIK</b> .H (ions score 47)                                      |
| 287 - 315   | 3226.3879 | 3227.3806 | 3227.4710 | -28 | 0    | R.ND <b>L</b> TDEENALLQQA <b>LAM</b> SMDEPAS <b>SHEL</b> R.D (ions score 33) |

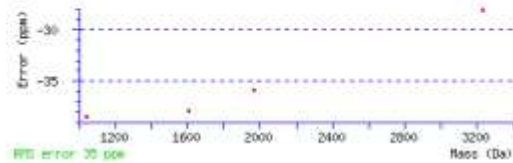

Spot No.: **62**

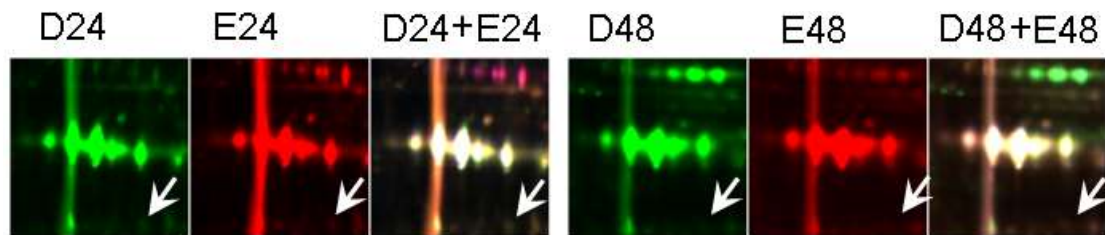

Accession No.: [scaffold0677\\_45450.mRNA1](#)

Plant species: *Hevea brasiliensis*

Protein name: **Probable carboxylesterase 6**

**Peptide sequences:** **K.LVEEVSGWLR.L; R.LYDDGSVDR.T;**  
**K.FMADPVPAHQDFIDGVATR.D; R.LPAACDDGFSALLWLR.S;**  
**R.SSEPWLNDYADFNR.V; R.VFLIGDSSGGNLVHEVAAR.A; R.LAGGIPVHPGFVR.S**

PFF Mascot score: [\[677\]](#) Sequence coverage %: [\[29\]](#)

Matched peptides No.: [\[7\]](#)

Calculated Mr: **37612** Calculated pI: **5.02**

### Annotated PFF spectra:

Ions score is  $-10 \cdot \log(P)$ , where P is the probability that the observed match is a random event. Individual ions scores  $> 31$  indicate identity or extensive homology ( $p < 0.05$ ). Protein scores are derived from ions scores as a non-probabilistic basis for ranking protein hits.

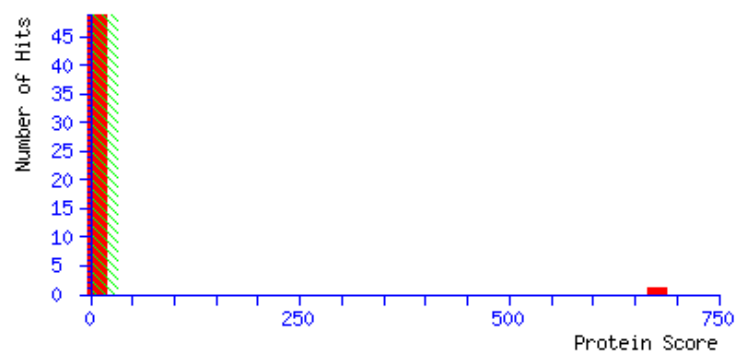

Matched peptide sequences: shown in **Bold Red**

```

1 MVRERKLVEE VSGWLRLYDD GSVDRTWIGS PQVKFMADPV PAHQDFIDGV
51 ATRDVTIDEN SGLRVRIYLP EPNSEDLNKL PVILHFHGGG FCISQADWYM
101 YYNIYTRLAK SVRAICVSVY LRLAPEHRLP AACDDGFSAL LWLRSLAQGR
151 SSEPWLNDYA DFNRVFLIGD SSGGNLVHEV AARAGNVDLS PLRLAGGIPV
201 HPGFVRSERS KSEMEQPESP FLTLDMVDKF LGLALPVGCT KDHPITCPMG
251 TAAPQLDSLN LPLLLLCVAE MDLIKDTEME YYEATKKANK DVELLISPGM
301 GHSFYLNKIA LDMDPPTAEQ TTALIEGIQE FINKH

```

Matched peptide information:

| Start - End | Observed  | Mr (expt) | Mr (calc) | ppm | Miss | Sequence                                                   |
|-------------|-----------|-----------|-----------|-----|------|------------------------------------------------------------|
| 7 - 16      | 1187.5850 | 1186.5777 | 1186.6346 | -48 | 0    | K.LVEEV <b>S</b> GWLR.L (Ions score 48)                    |
| 17 - 25     | 1039.4208 | 1038.4135 | 1038.4618 | -46 | 0    | R.LYD <b>S</b> SVDR.T (Ions score 63)                      |
| 35 - 53     | 2086.8975 | 2085.8902 | 2085.9942 | -50 | 0    | K.FMA <b>DP</b> VP <b>AHQ</b> DFIDGWATR.D (Ions score 108) |
| 129 - 144   | 1804.8143 | 1803.8070 | 1803.8978 | -50 | 0    | R.L <b>PA</b> ACDDGFSALL <b>WLR</b> .S (Ions score 125)    |
| 151 - 164   | 1713.6616 | 1712.6543 | 1712.7430 | -52 | 0    | R.SSEP <b>WL</b> NDYAD <b>ENR</b> .V (Ions score 98)       |
| 165 - 183   | 1940.9210 | 1939.9137 | 1940.0116 | -50 | 0    | R.VFLIGDSSG <b>GN</b> LVHEVAAR.A (Ions score 154)          |
| 194 - 206   | 1319.6923 | 1318.6850 | 1318.7510 | -50 | 0    | R.LAGGIPV <b>HPG</b> FVR.S (Ions score 81)                 |

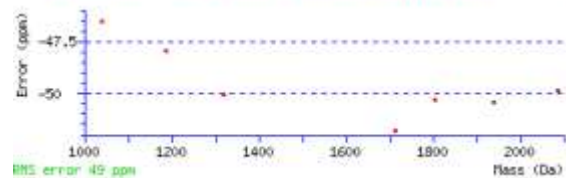

Spot No.: **63**

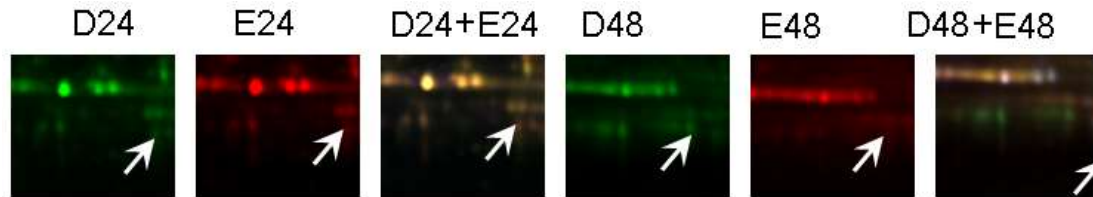

Accession No.: **scaffold0347\_688965.mRNA1**

Plant species: ***Hevea brasiliensis***

Protein name: **Annexin D4**

**Peptide sequences:** **R.STHFFIEDER.S; R.FENALVLWAMHPWER.D;**  
**R.LLHEALTHLPQSYR.V; R.VILEIACTR.S; R.KAYHSLYDHSIEEDVAIHVTGSER.K;**  
**K.AYHSLYDHSIEEDVAIHVTGSER.K; K.LLVALVSAYR.Y; K.ETAECCLCNPHAYFSK.V;**  
**K.EIKEEYNSLYGVPLTQK.I; K.DLLLALMTR.D**

PFF Mascot score: **[523]** Sequence coverage %: **[36]**

Matched peptides No.: **[10]**

Calculated Mr: **39535** Calculated pI: **7.72**

### Annotated PFF spectra:

Ions score is  $-10 \cdot \log(P)$ , where P is the probability that the observed match is a random event.  
Individual ions scores  $> 31$  indicate identity or extensive homology ( $p < 0.05$ ).  
Protein scores are derived from ions scores as a non-probabilistic basis for ranking protein hits.

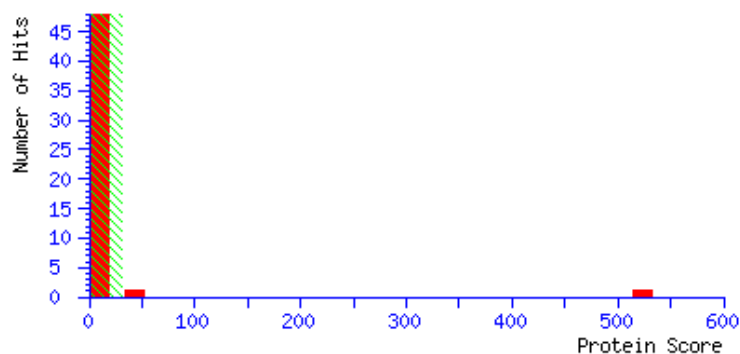

Matched peptide sequences: shown in **Bold Red**

```

1 MTIITFLFYK YSSISFSLQ NTKKKTWLIF KNWKLSPKLS QDLELNEKSL
51 ISILGKSDPA RRTTFRQRST HFFIEDERSF ERWDDHRINL LRLEFVRFEN
101 ALVLWAMHPW ERDARLLHEA LTLVPQSYRV ILEIACTRSS EELLGARKKAY
151 HSLYDHSIEE DVAIHVTGSE RKLLVALVSA YRYEGPKVSE DAAKSEAKLI
201 AKAIKNGDKK NPIDDDEVIR ILTTRSKPHL KAIYKHYKEV SGKNINEDIE
251 AADFILKETA ECLCNPHAYF SKVVDEAIRN DADHNTKKAL TRVIVTRADV
301 DLKEIKEEYN SLYGVPLTQK IDDNANGNYK DLLLAIMTRD

```

Matched peptide information:

| Start - End | Observed  | Mr(expt)  | Mr(calc)  | ppm | Miss | Sequence                                   |
|-------------|-----------|-----------|-----------|-----|------|--------------------------------------------|
| 69 - 78     | 1280.5591 | 1279.5518 | 1279.5833 | -25 | 0    | R.STHFFIEDER.S (Ions score 32)             |
| 98 - 112    | 1898.8768 | 1897.8695 | 1897.9297 | -32 | 0    | R.FENALVLWAMHPWER.D (Ions score 67)        |
| 116 - 129   | 1639.8740 | 1638.8667 | 1638.9093 | -26 | 0    | R.LLREKALTLPQSYR.V (Ions score 114)        |
| 130 - 138   | 1074.5660 | 1073.5587 | 1073.5903 | -29 | 0    | R.VILEIACR.S (Ions score 43)               |
| 148 - 171   | 2756.2407 | 2755.2334 | 2755.3201 | -31 | 1    | R.KAYHSLYDSIEEDVAIHVTGSR.K (Ions score 75) |
| 149 - 171   | 2628.1426 | 2627.1353 | 2627.2252 | -34 | 0    | K.AYHSLYDSIEEDVAIHVTGSR.K (Ions score 68)  |
| 173 - 182   | 1104.6590 | 1103.6427 | 1103.6703 | -25 | 0    | K.LLVALVSAYR.Y (Ions score 51)             |
| 258 - 272   | 1826.7563 | 1825.7490 | 1825.7763 | -15 | 0    | K.EYAECLCNPHAYFSK.V (Ions score 13)        |
| 304 - 320   | 2010.9761 | 2009.9688 | 2010.0309 | -31 | 1    | K.EIKEEYNSLYGVPLTQK.I (Ions score 27)      |
| 331 - 339   | 1045.5753 | 1044.5680 | 1044.6001 | -31 | 0    | K.DLLLAIMTR.D (Ions score 38)              |

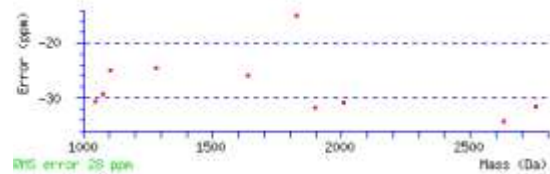

Spot No.: **64**

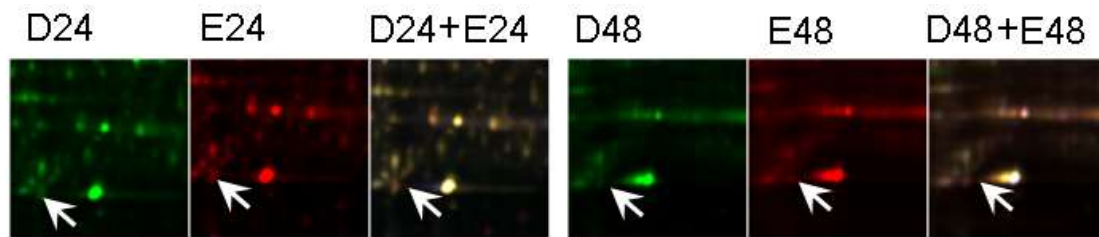

Accession No.: **scaffold0823\_158984.mRNA1**

Plant species: ***Hevea brasiliensis***

Protein name: **Isoflavone reductase-like protein**

**Peptide sequences:** **K.NLGVTLPGDLYDHESLVK.A;**  
**K.RFFPSEFGNDVDHVVHAVEPAK.S; R.FFPSEFGNDVDHVVHAVEPAK.S;**  
**R.AIEAAGIPYTYVPSNFFASLIIR.I**

PFF Mascot score: **[380]**      Sequence coverage %: **[20]**

Matched peptides No.: **[4]**

Calculated Mr: **33240**      Calculated pI: **5.50**

### Annotated PFF spectra:

Ions score is  $-10 \cdot \log(P)$ , where P is the probability that the observed match is a random event.  
Individual ions scores  $> 30$  indicate identity or extensive homology ( $p < 0.05$ ).  
Protein scores are derived from ions scores as a non-probabilistic basis for ranking protein hits.

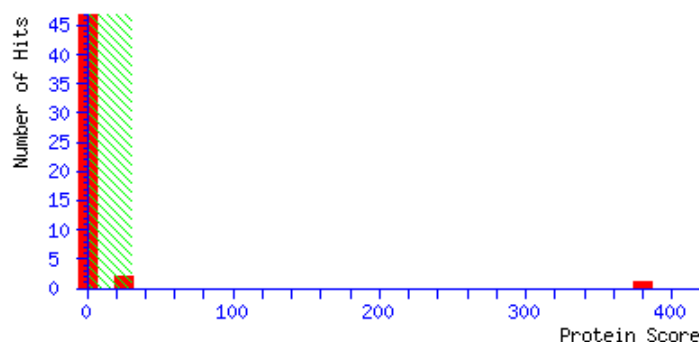

Matched peptide sequences: shown in **Bold Red**

```

1  MADKSKILIV GGTGYFGKFV VEASARAGHP TFLALARESTV SDPVKGGKIIIE
51 NFKNLGVTIL PGDLYDHESL VKAIKQVDVV ISTVGALQVA DQTKIIAAIN
101 EAGNIKRFFP SEFGNDVDHV HAVEPAKSAF ETKAQIRRAI EAAGIPYTYV
151 PSNFFASLII RILLQPGSNK VTIQGDGNVK AVFNKEDDIA TYTIKAVDDP
201 RTLNKTLIIK PPNVYTFNE LVALWEKKLG KILEKTYVPE EQLLKDIQAA
251 PIPFNVGLAI NHSVFIKGDQ TNFEIEPSWG VEASELYPDV KYSTVDELLD
301 LFV

```

Matched peptide information:

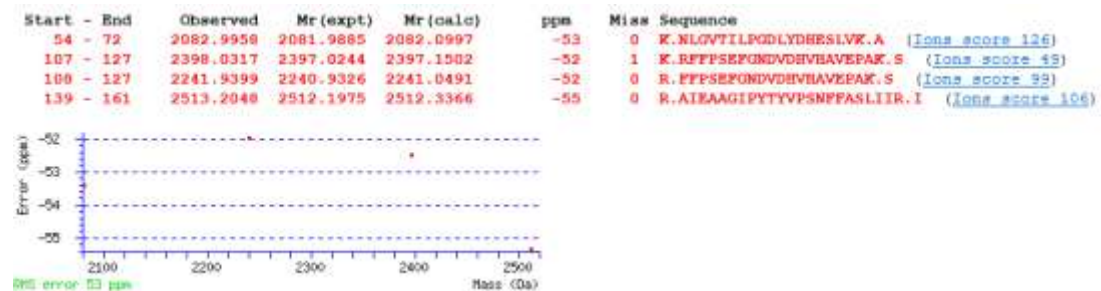



Spot No.: **65**

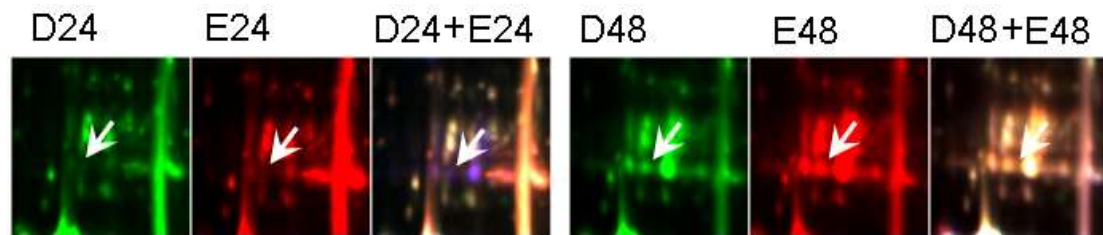

Accession No.: **scaffold0677\_448742.mRNA1**

Plant species: ***Hevea brasiliensis***

Protein name: **Proteasome subunit alpha type-5**

**Peptide sequences:** **R.GVNTFSPEGR.L; R.LFQVEYAIEAIK.L;**  
**R.FSYGEPMTVESTTQALCDLALR.F;**  
**K.AIGSGSEGADSSLQEYQNKDLTLQEAETIALSILK.Q; K.DLTLQEAETIALSILK.Q;**  
**K.VAPTYHLYTPAEVETVISR.L; K.VAPTYHLYTPAEVETVISR.L.-**

PFF Mascot score: **[609]**      Sequence coverage %: **[41]**

Matched peptides No.: **[7]**

Calculated Mr: **26165**      Calculated pI: **4.70**

### Annotated PFF spectra:

Ions score is  $-10 \cdot \log(P)$ , where P is the probability that the observed match is a random event.  
Individual ions scores  $> 31$  indicate identity or extensive homology ( $p < 0.05$ ).  
Protein scores are derived from ions scores as a non-probabilistic basis for ranking protein hits.

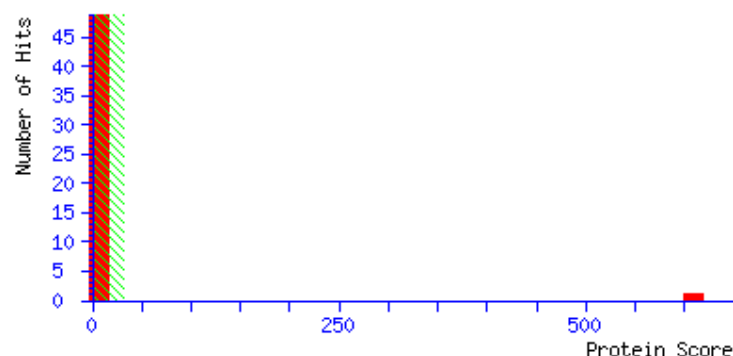

Matched peptide sequences: shown in **Bold Red**

```

1  MFLIRTEYDR GVNTFSPEGR LFQVEYAIEA IKLGSTAIGL KTKEGVVLAV
51 EKRTISPLLE PSSVEKVMEI DEHIGCAMSG LIADARTLVE HARVETQNHR
101 FSYGEPMTVE STTQALCDLA LRFEGEDEES MSRPFGVSLI IAGHDENGPS
151 LYYTDPSTGF WQCNKAIGS GSEGADSSLQ EQYNKDLTLQ EAETIALSIL
201 KQVMEEKVIP NNVDIAKVAP TYHLYTPAEV ETVISRL

```

Matched peptide information:

| Start - End | Observed  | Mr (expt) | Mr (calc) | ppm | Miss | Sequence                                              |
|-------------|-----------|-----------|-----------|-----|------|-------------------------------------------------------|
| 11 - 20     | 1063.4688 | 1062.4615 | 1062.5094 | -45 | 0    | R.GVNTFSPEGR.L (ions_score 31)                        |
| 21 - 32     | 1423.7102 | 1422.7029 | 1422.7758 | -51 | 0    | R.LFQVEYAIEA.K.L (ions_score 24)                      |
| 101 - 122   | 2489.0378 | 2488.0305 | 2488.1614 | -53 | 0    | R.FSYGEPMTVESTTQALCDLALR.F (ions_score 146)           |
| 167 - 201   | 3679.6888 | 3678.6807 | 3678.8475 | -45 | 1    | K.AIGSGSGADSSLQEQYNKDLTQEAETIALSILK.Q (ions_score 14) |
| 186 - 201   | 1757.8966 | 1756.8893 | 1756.9822 | -53 | 0    | K.DLTQEAETIALSILK.Q (ions_score 81)                   |
| 218 - 236   | 2146.0105 | 2145.0032 | 2145.1106 | -50 | 0    | K.VAPTYHLYTPAEVETVISR.L (ions_score 132)              |
| 218 - 237   | 2259.0830 | 2258.0757 | 2258.1947 | -53 | 1    | K.VAPTYHLYTPAEVETVISRL.- (ions_score 110)             |

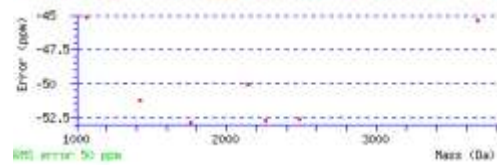

Spot No.: **66**

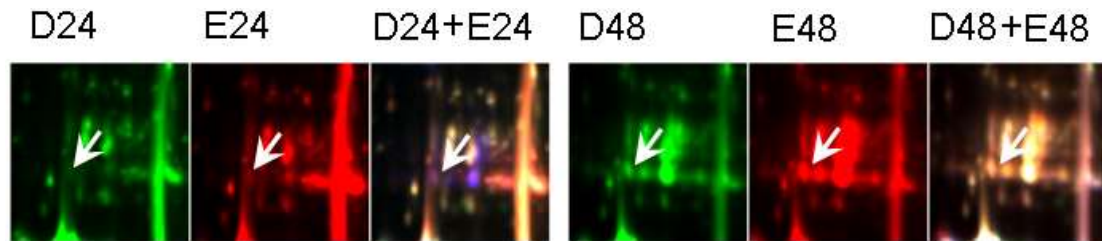

Accession No.: **scaffold1222\_60641.mRNA1**

Plant species: ***Hevea brasiliensis***

Protein name: **Small rubber particle protein**

**Peptide sequences:** **K.TVVTPVYYIPLEAVK.F; K.QVSAQTYSVAQDAPR.I;**  
**R.IVLDVASSVENTGVQEGAK.A; K.AEQYAVITWR.A;**  
**R.ALNKLPLVPQVANVVPTAVYFSEK.Y**

PFF Mascot score: **[532]** Sequence coverage %: **[41]**

Matched peptides No.: **[5]**

Calculated Mr: **22331** Calculated pI: **4.80**

### **Annotated PFF spectra:**

Ions score is  $-10 \cdot \log(P)$ , where P is the probability that the observed match is a random event.  
Individual ions scores  $> 31$  indicate identity or extensive homology ( $p < 0.05$ ).  
Protein scores are derived from ions scores as a non-probabilistic basis for ranking protein hits.

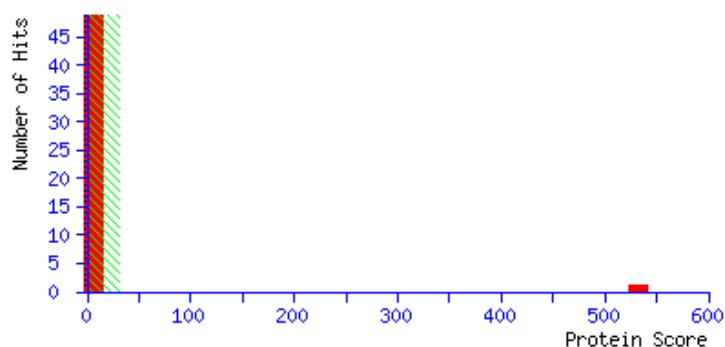

Matched peptide sequences: shown in **Bold Red**

```

1 MAEEVEEERL KYLDFVRAAG VYAVDSFSTL YLYAKDISGP LKPGVDTIEN
51 VVKTVVTPVY YIPLEAVK FV DKTVDVSVIS LDGVVPPVIK QVSAQTYSSVA
101 QDAPRIVLDV ASSVENTGVQ EGAK ALYANL EPKAEQYAVI TWRALNKLPL
151 VPQVANVVVP TAVYFSEK YN DVVRGITEQG YRVSSYLPLL PTEKITKVFG
201 DEAS

```

Matched peptide information:

| Start - End | Observed  | Mr (expt) | Mr (calc) | ppm | Miss | Sequence                                       |
|-------------|-----------|-----------|-----------|-----|------|------------------------------------------------|
| 54 - 68     | 1691.8862 | 1690.8769 | 1690.9546 | -45 | 0    | K.TVVTPVYYIPLEAVK.F (Ions score 64)            |
| 91 - 105    | 1620.7314 | 1619.7241 | 1619.7963 | -41 | 0    | K.QVSAQTYSSVAQDAPR.I (Ions score 116)          |
| 106 - 124   | 1933.9448 | 1932.9375 | 1933.0157 | -40 | 0    | R.IVLDVASSVENTGVQEGAK.A (Ions score 153)       |
| 134 - 143   | 1236.5956 | 1235.5883 | 1235.6299 | -34 | 0    | K.AEQYAVITWR.A (Ions score 86)                 |
| 144 - 168   | 2696.4307 | 2695.4234 | 2695.5313 | -40 | 1    | R.ALNKLPLVPQVANVVVPTAVYFSEK.Y (Ions score 110) |

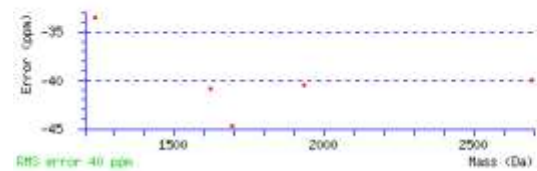

Spot No.: **67**

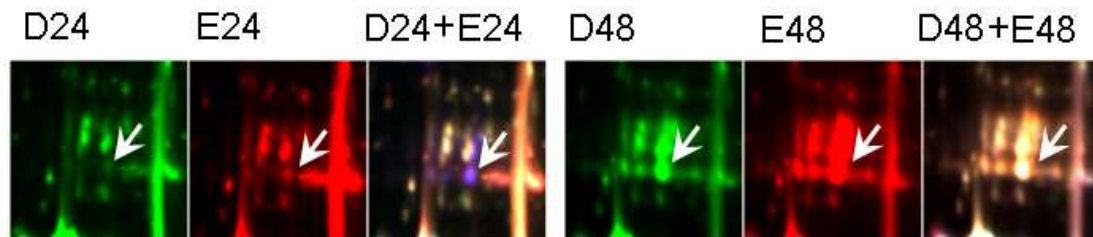

Accession No.: **scaffold0814\_47376.mRNA1**

Plant species: ***Hevea brasiliensis***

Protein name: **14-3-3-like protein**

**Peptide sequences:** **K.LAEQAERYEEMVEFMEK.V; K.TVDVEELTVEER.N; K.ICDGILSLLESHLIPSASSAESK.V; K.SAQDIALADLAPTHPIR.L; K.DSTLIMQLLR.D**

PFF Mascot score: **[396]** Sequence coverage %: **[29]**

Matched peptides No.: **[5]**

Calculated Mr: **29931**

Calculated pI: **4.76**

### Annotated PFF spectra:

Ions score is  $-10 \cdot \log(P)$ , where P is the probability that the observed match is a random event.

Individual ions scores  $> 30$  indicate identity or extensive homology ( $p < 0.05$ ).

Protein scores are derived from ions scores as a non-probabilistic basis for ranking protein hits.

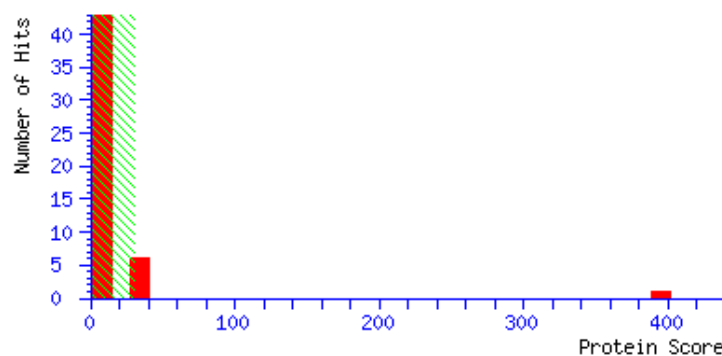

Matched peptide sequences: shown in **Bold Red**

```

1  MSPTSSREE NVYMAKLAEQ AERYEEMVEF MEKVAKTVDV EELTVEERNL
51 LSVAYKNVIG ARRASWRIIS SIEQKEESRG NEDHVTIIKE YRGKIESELS
101 KICDGILSLL ESHLIPSASS AESKVFYLMK KGDYHRYLAE FKTAGERKEA
151 AESTLLAYKS AQDIALADLA PTHPIRLGLA LNFSVFYYEI LNSPDRACNL
201 AKQAFDEAIS ELDTLGEESY KDSTLMQLL RDNLTLTWSD ITDEAGDEIK
251 EASKRESGEG QPQQ

```

Matched peptide information:

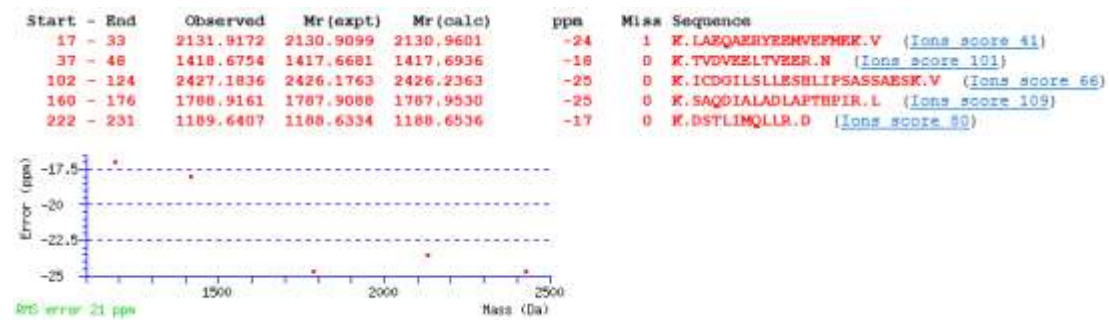

Spot No.: **68**

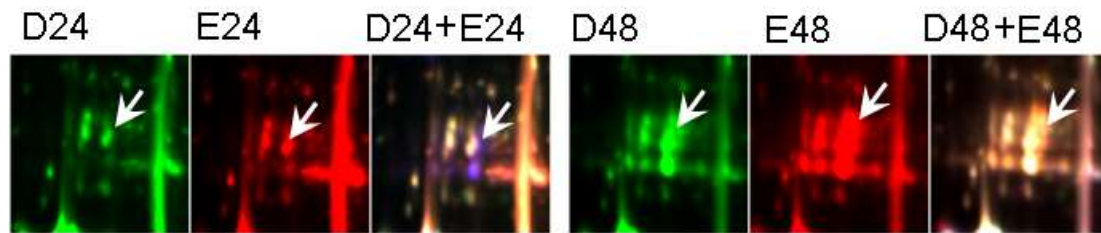

Accession No.: **scaffold0814\_47376.mRNA1**

Plant species: ***Hevea brasiliensis***

Protein name: **14-3-3-like protein**

**Peptide sequences:** **M.SPTESSREENVYMAK.L;**

**K.LAEQAERYEEMVEFMEK.V; K.TVDVEELTVEER.N;**

**K.ICDGILSLLESHLIPSASSAESK.V; K.SAQDIALADLAPTHPIR.L;**

**R.LGLALNFSVFYYEILNSPDR.A; K.QAFDEAISELDTLGEESYKDSTLIMQLLR.D;**

**K.DSTLIMQLLR.D**

PFF Mascot score: **[821]**

Sequence coverage %: **[50]**

Matched peptides No.: **[8]**

Calculated Mr: **29931**

Calculated pI: **4.76**

### Annotated PFF spectra:

Ions score is  $-10 \cdot \log(P)$ , where P is the probability that the observed match is a random event.

Individual ions scores  $> 30$  indicate identity or extensive homology ( $p < 0.05$ ).

Protein scores are derived from ions scores as a non-probabilistic basis for ranking protein hits.

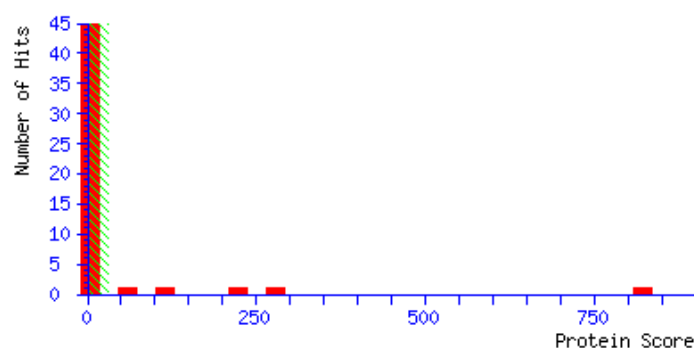

Matched peptide sequences: shown in **Bold Red**

```

1  MSPTESSREE NVYMAKLAEQ AERYEEMVEF MEKVAKTVDV EELTVEERNL
51 LSVAYKNVIG ARRASWRIIS SIEQKEESRG NEDHVTIIKE YRGKIESELS
101 KICDGILSLL ESHLIPSASS AESKVFYLM KGDYHRYLAE FKTAGERKEA
151 AESTLLAYKS AQDIALADLA PTHPIRLGLA LNFSVFYYEI LNSPDRACNL
201 AKQAFDEAIS ELDTLGEESY KDSTLIMQLL RDNLTLTWTS ITDEAGDEIK
251 EASKRESGEG QPQQ

```

Matched peptide information:

| Start - End | Observed  | Mr (expt) | Mr (calc) | ppm | Miss Sequence                                        |
|-------------|-----------|-----------|-----------|-----|------------------------------------------------------|
| 2 - 16      | 1727.7111 | 1726.7038 | 1726.7032 | -46 | 1 M.SPTESSREENVYMAK.L (ions score 85)                |
| 17 - 33     | 2131.0774 | 2130.0701 | 2130.9601 | -42 | 1 K.LAEQAEKYKENVMEK.V (ions score 70)                |
| 37 - 48     | 1418.6472 | 1417.6399 | 1417.6936 | -38 | 0 K.TVDVEELTVEER.N (ions score 110)                  |
| 102 - 124   | 2427.1436 | 2426.1363 | 2426.2363 | -41 | 0 K.ICDGILSLLSHLIPSASSAEK.V (ions score 90)          |
| 160 - 176   | 1708.0860 | 1707.0787 | 1707.9530 | -42 | 0 K.SAQDIALADLAPTHPIR.L (ions score 132)             |
| 177 - 196   | 2331.0972 | 2330.0899 | 2330.1947 | -45 | 0 R.LGLALNFSVFYYEILNSPDR.A (ions score 70)           |
| 203 - 231   | 3315.4958 | 3314.4885 | 3314.6229 | -40 | 1 K.QAFDEAISELDTLGEESYKDSTLIMQLLR.D (ions score 174) |
| 222 - 231   | 1109.6123 | 1108.6050 | 1108.6536 | -41 | 0 K.DSTLIMQLLR.D (ions score 88)                     |

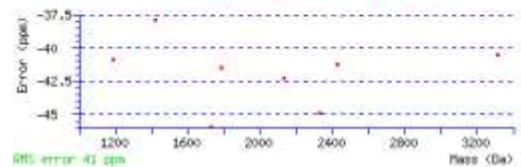



Spot No.: **69**

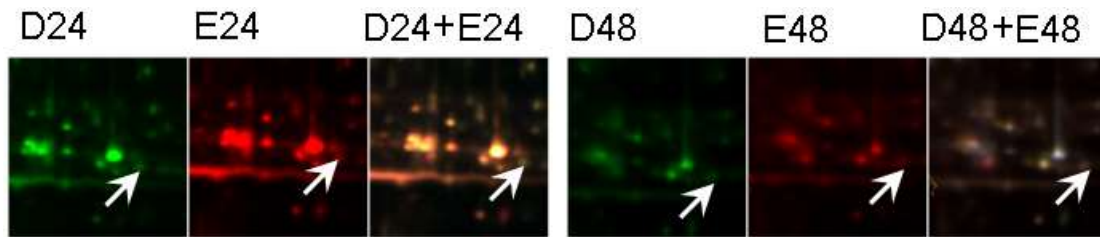

Accession No.: **scaffold0127\_20309.mRNA1**

Plant species: ***Hevea brasiliensis***

Protein name: **Proteasome subunit beta type-6**

**Peptide sequences:** **R.TSTGMVYVANR.A; K.ITQLTDNVYVCR.S;**

**R.SGSAADSQIVSDYVR.Y; R.YFLHQHTIQLGQPATVK.V;**

**K.NMLETGLIVGGWDKYEGGK.I; R.TVIINSEGVTR.N;**

**K.LPLWHEELEPHNSLLDIINASGPEPMHM.-**

PFF Mascot score: **[663]**

Sequence coverage %: **[48]**

Matched peptides No.: **[7]**

Calculated Mr: **24974**

Calculated pI: **5.47**

### Annotated PFF spectra:

Ions score is  $-10 \cdot \log(P)$ , where P is the probability that the observed match is a random event.

Individual ions scores  $> 30$  indicate identity or extensive homology ( $p < 0.05$ ).

Protein scores are derived from ions scores as a non-probabilistic basis for ranking protein hits.

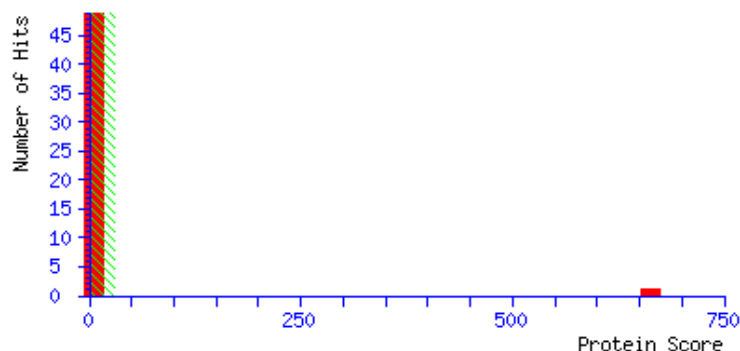

Matched peptide sequences: shown in **Bold Red**

```

1 MDLKAPHSMG TTIIGVTYDG GVVLGADSRT STGMYVANRA SDKITQLTDN
51 VYVCRSGSAA DSQIVSDYVR YFLHQHTIQL GQPATVKVAA NLVRLLSYNN
101 KNMLETGLIV GGWDKYEGGK IYGVPLGGTI IEQPFAIGGS GSSYLYGFFD
151 QAWKEGMTKD EAEQLVVKAV SLAMARDGAS GGVVRTVIIN SEGVTRNFYF
201 GDKLPLWHEE LEPHNSLLDI INASGPEPMH M

```

Matched peptide information:

| Start - End | Observed  | Mr(expt)  | Mr(calc)  | ppm | Miss | Sequence                                        |
|-------------|-----------|-----------|-----------|-----|------|-------------------------------------------------|
| 30 - 39     | 1099.4885 | 1098.4812 | 1098.5128 | -29 | 0    | R.TSTGMYVANR.A (Ions score 77)                  |
| 44 - 55     | 1481.7014 | 1480.6941 | 1480.7344 | -27 | 0    | K.ITQLTDNYYVCR.S (Ions score 113)               |
| 56 - 70     | 1554.7001 | 1553.6928 | 1553.7322 | -25 | 0    | R.SQSAADSDQIVSDYVR.Y (Ions score 131)           |
| 71 - 87     | 1980.9983 | 1979.9910 | 1980.0581 | -34 | 0    | R.YFLRQHTIQLGQPATVK.V (Ions score 96)           |
| 102 - 120   | 2066.9509 | 2065.9436 | 2066.0143 | -34 | 1    | K.NMLETGLIVGGWDKYEGGK.I (Ions score 111)        |
| 186 - 196   | 1186.6257 | 1187.6184 | 1187.6510 | -27 | 0    | R.TVIINSEGVTR.N (Ions score 82)                 |
| 204 - 231   | 3219.4785 | 3218.4712 | 3218.5528 | -25 | 0    | K.LPLWHEELEPHNSLLDIINASGPEPMH.- (Ions score 43) |

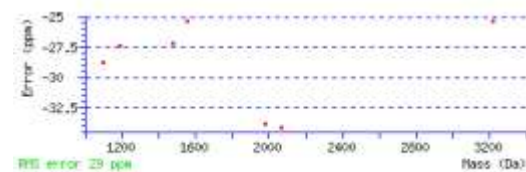

Spot No.: **70**

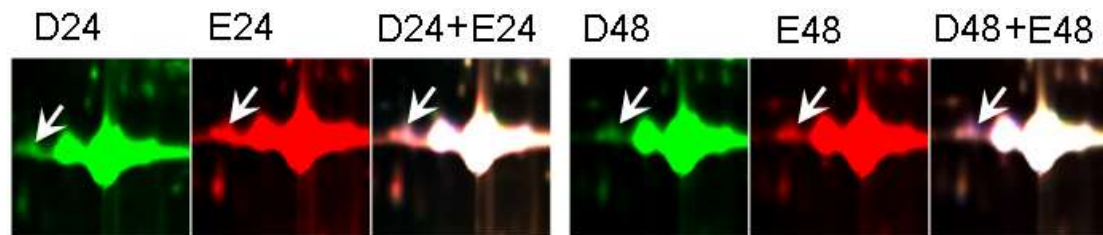

Accession No.: **scaffold1222\_60641.mRNA1**

Plant species: ***Hevea brasiliensis***

Protein name: **Small rubber particle protein**

**Peptide sequences:** **K.DISGPLKPGVDTIENVVK.T;**  
**K.TVVTPVYYIPLEAVK.F; K.FVDKTVDVSVTSLDGVVPPVIK.Q;**  
**K.TVDVSVTSLDGVVPPVIK.Q; K.QVSAQTYSVAQDAPR.I;**  
**R.IVLDVASSVENTGVQEGAK.A; K.ALYANLEPK.A; K.AEQYAVITWR.A;**  
**R.ALNKLPLVPQVANVVPTAVYFSEK.Y; R.VSSYLPLLPTTEK.I**

PFF Mascot score: **[830]** Sequence coverage %: **[71]**

Matched peptides No.: **[10]**

Calculated Mr: **22331`** Calculated pI: **4.80**

### Annotated PFF spectra:

Ions score is  $-10 \cdot \log(P)$ , where P is the probability that the observed match is a random event.  
Individual ions scores  $> 31$  indicate identity or extensive homology ( $p < 0.05$ ).  
Protein scores are derived from ions scores as a non-probabilistic basis for ranking protein hits.

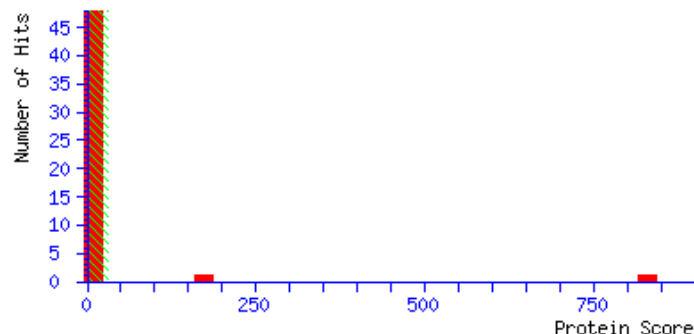

Matched peptide sequences: shown in **Bold Red**

```

1 MAEEVEEERL KYLDFVRAAG VYAVDSFSTL YLYAKDISGP LKPGVDTIEN
51 VVKTVVTPVY YIPLEAVK FV DKTVDVSVTS LDGVVPPVIK QVSAQTSVA
101 QDAPRIVLDV ASSVFTGVQ EGAKALYANL EPKAEQYAVI TWRALNKLPL
151 VPQVANVVVP TAVYFSEKYN DVVRGITEQG YRVSSYLPLL PTEKITKVF
201 DEAS

```

Matched peptide information:

| Start - End | Observed  | Mr (expt) | Mr (calc) | ppm | Miss Sequence                                                  |
|-------------|-----------|-----------|-----------|-----|----------------------------------------------------------------|
| 36 - 53     | 1880.9950 | 1879.9877 | 1880.0255 | -20 | 1 K.DISGP <b>LKPGVDTIEN</b> VVK.T (Ions score 136)             |
| 54 - 68     | 1691.9015 | 1690.8942 | 1690.9546 | -36 | 0 K.TVVT <b>FVYYIPL</b> AVK.F (Ions score 76)                  |
| 69 - 90     | 2314.2390 | 2313.2317 | 2313.2832 | -22 | 1 K.FV <b>DKTV</b> DVSVTS <b>LDGVVPPVIK</b> .Q (Ions score 84) |
| 73 - 90     | 1824.9690 | 1823.9617 | 1824.0245 | -34 | 0 K.TVDVSVTS <b>LDGVVPPVIK</b> .Q (Ions score 34)              |
| 91 - 105    | 1620.7704 | 1619.7631 | 1619.7903 | -17 | 0 K.QVSAQTSVA <b>QDA</b> PR.I (Ions score 158)                 |
| 106 - 124   | 1933.9744 | 1932.9671 | 1933.0157 | -25 | 0 R.IVLDVASSV <b>FTGVQ</b> EGAK.A (Ions score 133)             |
| 125 - 133   | 1018.5144 | 1017.5071 | 1017.5495 | -42 | 0 K.ALYAN <b>LEPK</b> .A (Ions score 25)                       |
| 134 - 143   | 1236.6156 | 1235.6083 | 1235.6299 | -17 | 0 K.AEQYAVITWR.A (Ions score 70)                               |
| 144 - 160   | 2696.4995 | 2695.4922 | 2695.5313 | -14 | 1 R.ALNKLPLVPQVANVVVP <b>TAVYFSEK</b> .Y (Ions score 24)       |
| 163 - 194   | 1346.7030 | 1345.6957 | 1345.7493 | -40 | 0 R.VSSYLPLL <b>PT</b> EK.I (Ions score 71)                    |

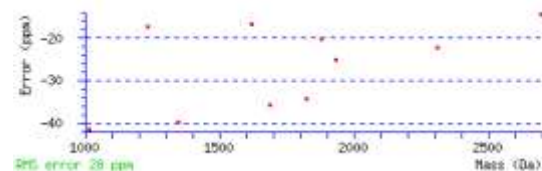

Spot No.: **71**

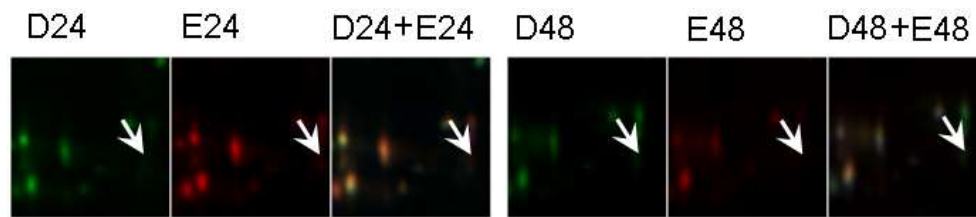

Accession No.: **scaffold0344\_256841.mRNA1**

Plant species: ***Hevea brasiliensis***

Protein name: **18.5 kDa class I heat shock protein**

**Peptide sequences:** **K.DFPFPSEASSSLFPR.E; K.ETPEAHVFK.A;  
R.VLQISGER.H; K.EDKNDTWHR.V**

PFF Mascot score: **[221]**

Sequence coverage %: **[26]**

Matched peptides No.: **[4]**

Calculated Mr: **18064**

Calculated pI: **5.97**

### **Annotated PFF spectra:**

Ions score is  $-10 \cdot \log(P)$ , where P is the probability that the observed match is a random event.

Individual ions scores  $> 31$  indicate identity or extensive homology ( $p < 0.05$ ).

Protein scores are derived from ions scores as a non-probabilistic basis for ranking protein hits.

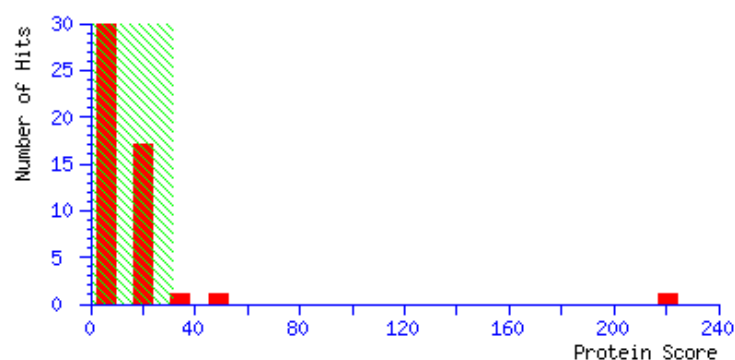

Matched peptide sequences: shown in **Bold Red**

1 MSLTPFSGNR RSSIFDPFSL DIWDPFK**DFP FPSEASSSSL FPRENSAFVS**  
51 TRIDWK**ETPE AHVFK**ADLPG LRKEEVKVEI EDDR**VLQISG ERHVEKEDKN**  
101 **DTWHR**VERSS GKFSRSFRLP ENTKMDQIKA SMENGVLTVT VPKAEVKKPD  
151 VKAIEISG

Matched peptide information:

| Start - End | Observed  | Mr(expt)  | Mr(calc)  | ppm | Miss | Sequence                                              |
|-------------|-----------|-----------|-----------|-----|------|-------------------------------------------------------|
| 28 - 43     | 1788.8492 | 1787.8419 | 1787.8519 | -6  | 0    | K.DFPFPSPASSSLFPR.E ( <a href="#">Ions score 70</a> ) |
| 57 - 65     | 1057.5239 | 1056.5166 | 1056.5240 | -7  | 0    | K.ETPEAHVK.A ( <a href="#">Ions score 30</a> )        |
| 85 - 92     | 901.5137  | 900.5065  | 900.5029  | 4   | 0    | R.VLQISGER.H ( <a href="#">Ions score 49</a> )        |
| 97 - 105    | 1200.5371 | 1199.5298 | 1199.5319 | -2  | 1    | K.EDKNDTWHR.V ( <a href="#">Ions score 72</a> )       |

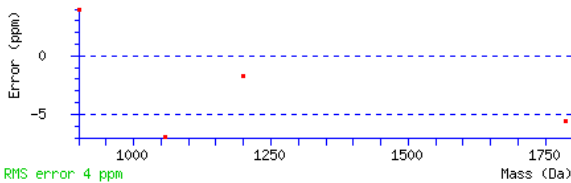

Spot No.: **72**

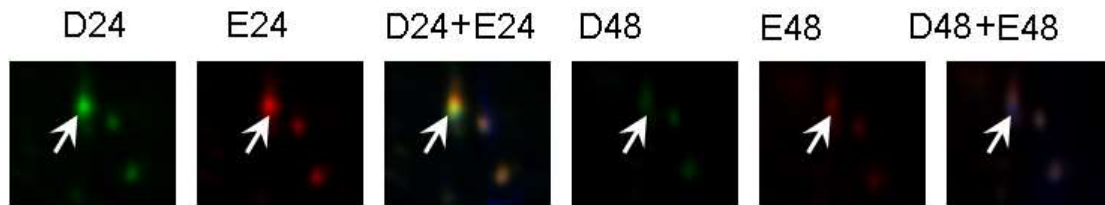

Accession No.: **scaffold0026\_327123.mRNA1**

Plant species: ***Hevea brasiliensis***

Protein name: **Chlorophyllase type 0**

**Peptide sequences:** **K.EIEFAAEVGNWLLSGLQSVLPEK.V;**  
**R.GGNIAFALALGYSK.T; K.ISALVGLDPVGR.V**

PFF Mascot score: **[316]**      Sequence coverage %: **[14]**

Matched peptides No.: **[3]**

Calculated Mr: **37785**

Calculated pI: **6.30**

### **Annotated PFF spectra:**

Ions score is  $-10 \cdot \log(P)$ , where P is the probability that the observed match is a random event.  
Individual ions scores  $> 30$  indicate identity or extensive homology ( $p < 0.05$ ).  
Protein scores are derived from ions scores as a non-probabilistic basis for ranking protein hits.

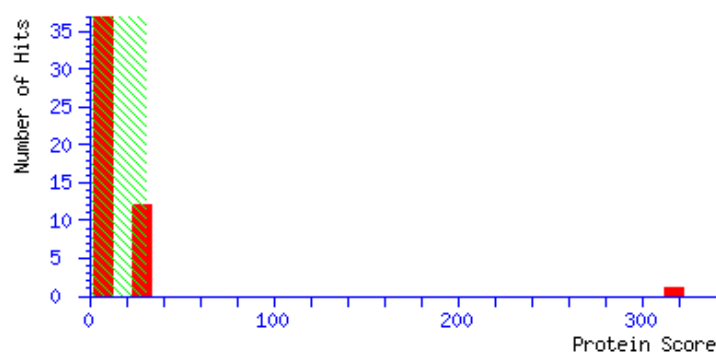

Matched peptide sequences: shown in **Bold Red**

```

1  MLVTLLVILL ASALEAKPQF PTVVLLETKP VQDILDVFVT GSFPKSIDV
51 KKSNPASPPK PLLIVSPITD GTYPVFMFLH GTCLENYFYS NLLPHIASHG
101 FIVVAPQVYS CINWLIPKLP IRESKEIEFA AEVGNWLLSG LQSVLPEKVT
151 WDQDKLALGG HNRGGNIAFA LALGYSKTPL EVKISALVGL DPVGRVSTDP
201 KILTNPVPHSF NLSIPVTVIG TGLGNESVCG VVGLACAPNY MNHVKFYKNC
251 KAPASHFVTT DYGHMDMLDD NPTGILAIIA NSICKNSKDP RDQMRRTVGG
301 LIVAFLEKAYF QADSGDFMTI LNEPSVAPAK LDPVQFKEEQ NHAQV

```

Matched peptide information:

| Start - End | Observed  | Mr(expt)  | Mr(calc)  | ppm | Miss Sequence                                   |
|-------------|-----------|-----------|-----------|-----|-------------------------------------------------|
| 126 - 148   | 2529.2341 | 2528.2268 | 2528.3162 | -35 | 0 K.EIEFAAEVGNWLLSG LQSVLPEK.V (Ions score 125) |
| 164 - 177   | 1381.6929 | 1380.6856 | 1380.7401 | -39 | 0 R.GGNIAFALALGYSK.T (Ions score 87)            |
| 184 - 195   | 1196.6589 | 1195.6516 | 1195.6925 | -34 | 0 K.ISALVGLDPVGR.V (Ions score 105)             |

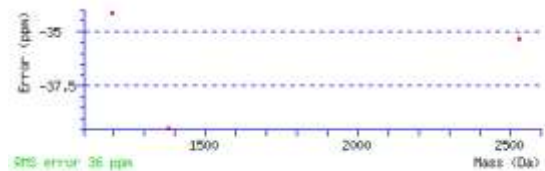



Spot No.: **73**

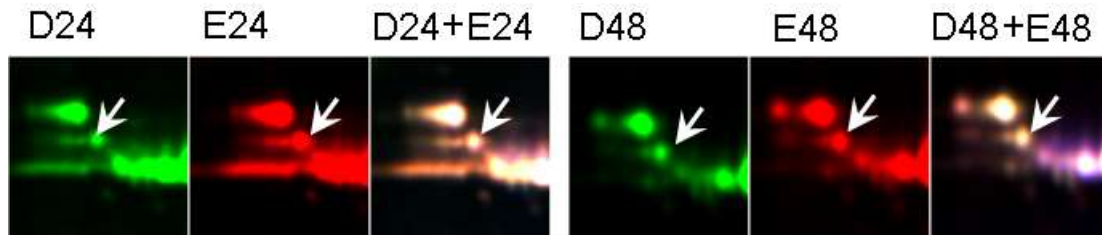

Accession No.: **scaffold1222\_89338.mRNA1**

Plant species: ***Hevea brasiliensis***

Protein name: **Small rubber particle protein**

**Peptide sequences:** **K.YLEFVQATTDNAVLTALSNIYLYAK.D;**  
**K.DNSGPLKPGVETIEGVAK.T; R.AVDASFTTLQNIVPSVLK.Q; K.QLPTQACDTSVK.E**

PFF Mascot score: **[381]** Sequence coverage %: **[61]**

Matched peptides No.: **[4]**

Calculated Mr: **12769** Calculated pI: **4.61**

### Annotated PFF spectra:

Ions score is  $-10 \cdot \log(P)$ , where P is the probability that the observed match is a random event.  
Individual ions scores  $> 31$  indicate identity or extensive homology ( $p < 0.05$ ).  
Protein scores are derived from ions scores as a non-probabilistic basis for ranking protein hits.

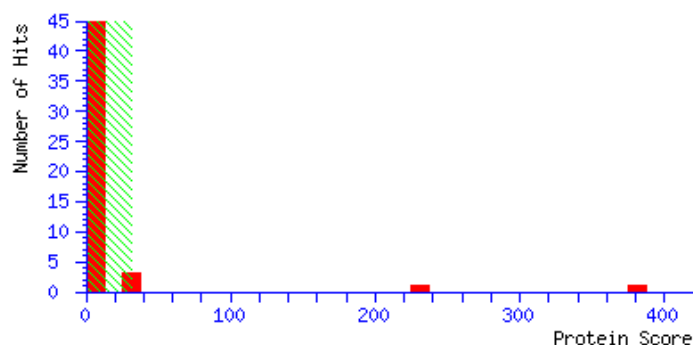

Matched peptide sequences: shown in **Bold Red**

1 MAEGKENENF QQEANEQEEK LK**YLEFVQAT** TDNAV**TALSN** IYLYAK**DNSG**  
51 **PLKPGVETIE** **GVAK**TVVIPA SKIPTEAIKF ADRAVDAS**FT** TLQ**NI**VP**SVL**  
101 **KQLPTQACD**T **SVK**ESAE

Matched peptide information:

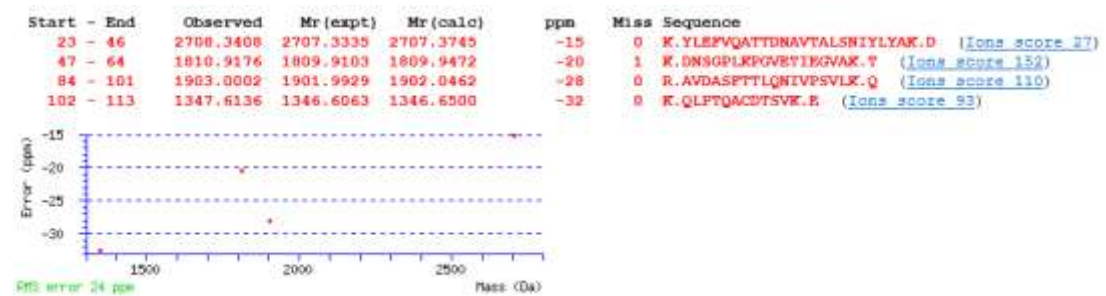

Spot No.: **74**

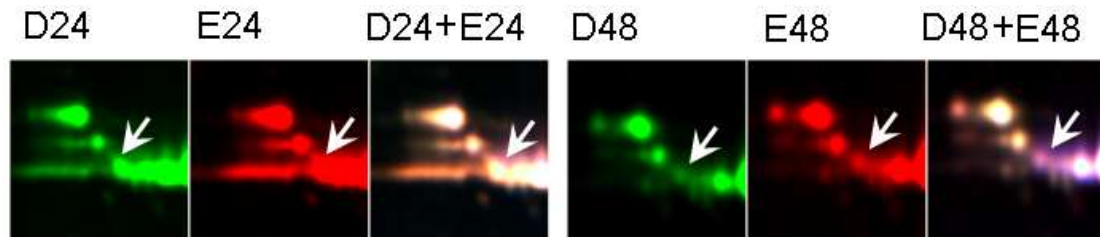

Accession No.: **scaffold1222\_136753.mRNA1**

Plant species: ***Hevea brasiliensis***

Protein name: **Rubber elongation factor protein**

**Peptide sequences:** **K.DKSGPLQPGVDIEGPVK.N; K.NVAVPLYNR.F; K.FVDSTVVASVTIHDR.S; K.DASIQVVS AIR.A; R.SLASSLPGQTK.I**

PFF Mascot score: **[451]** Sequence coverage %: **[46]**

Matched peptides No.: **[5]**

Calculated Mr: **14713** Calculated pI: **5.04**

### Annotated PFF spectra:

Ions score is  $-10 \cdot \log(P)$ , where P is the probability that the observed match is a random event. Individual ions scores  $> 31$  indicate identity or extensive homology ( $p < 0.05$ ). Protein scores are derived from ions scores as a non-probabilistic basis for ranking protein hits.

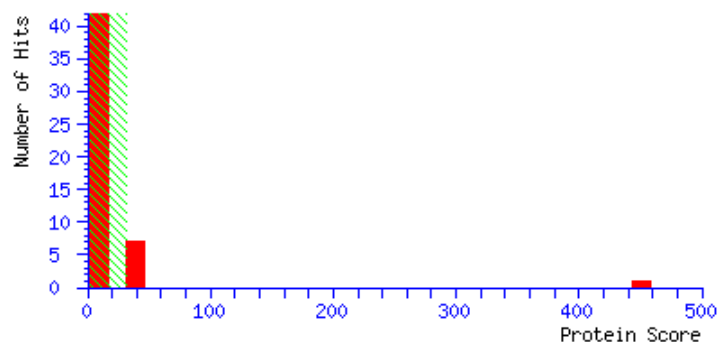

Matched peptide sequences: shown in **Bold Red**

```

1 MAEDEDNQOG QGEGCLKYLGF VQDAATYAVT TFSNVYLFAK DKSGPLQPGV
51 DIIEGPVKNV AVPLYNRFSY IPNGALKFVD STVVASVTII DRSLPPIVKD
101 ASIQVVS AIR AAPEAARSLA SSLPGQTKIL AKVIFYGEN

```

Matched peptide information:

| Start - End | Observed  | Mr(expt)  | Mr(calc)  | ppm | Miss Sequence                             |
|-------------|-----------|-----------|-----------|-----|-------------------------------------------|
| 41 - 58     | 1849.0270 | 1848.0197 | 1847.9993 | 11  | 1 K.DKSGPLQPGVDIIEGPVK.N (Ions score 129) |
| 59 - 67     | 1045.5854 | 1044.5781 | 1044.5716 | 6   | 0 K.NVAVPLYNR.F (Ions score 38)           |
| 78 - 92     | 1621.8971 | 1620.8898 | 1620.8723 | 11  | 0 K.FVDSTVVASVTIIDR.S (Ions score 143)    |
| 100 - 110   | 1158.6569 | 1157.6496 | 1157.6404 | 8   | 0 K.DASIQVVS AIR.A (Ions score 103)       |
| 118 - 128   | 1088.5940 | 1087.5867 | 1087.5873 | -1  | 0 R.SLASSLPQGTK.I (Ions score 38)         |

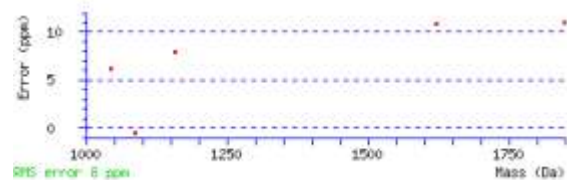

Spot No.: **75**

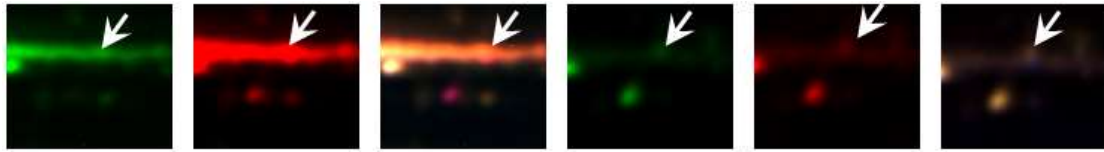

Accession No.: **scaffold0155\_515853.mRNA1**

Plant species: ***Hevea brasiliensis***

Protein name: **Pro-hevein**

**Peptide sequences:** **K.YGWTAFCGPVGAHGQPSCGK.C;**

**R.IVDQCSNGGLDLVDNVFR.Q; R.QLDTDGKGYER.G**

PFF Mascot score: **[221]**

Sequence coverage %: **[23]**

Matched peptides No.: **[3]**

Calculated Mr: **23042**

Calculated pI: **8.15**

### **Annotated PFF spectra:**

Ions score is  $-10 \cdot \log(P)$ , where P is the probability that the observed match is a random event.

Individual ions scores  $> 31$  indicate identity or extensive homology ( $p < 0.05$ ).

Protein scores are derived from ions scores as a non-probabilistic basis for ranking protein hits.

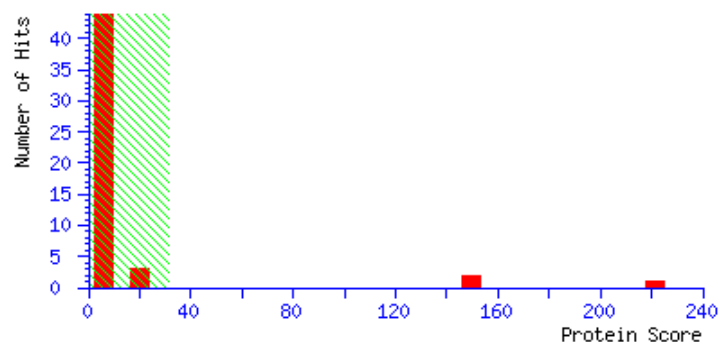

Matched peptide sequences: shown in **Bold Red**

```

1  MGRVMNIFIV VLLCLTGVAI AEQCGRQAGG KLCPNNLCCS QYGWCGSSDD
51 YCSPSKNCQS NCKGGGGGGG GGGGSASNVL ATYHLYNPQQ HGWDLNAVSA
101 YCSTWDANKP YSWRSKYGT AFCGPVGAHG QPSCGKCLSV TNTGTGAKTT
151 VRIVDQCSNG GLDLDVNVFR QLDTDGKGYE RGHLTVNYQF VNCGDSFNPL
201 FSIMKSSVIN

```

Matched peptide information:

| Start - End | Observed  | Mr (expt) | Mr (calc) | ppm | Miss | Sequence                          |                                    |
|-------------|-----------|-----------|-----------|-----|------|-----------------------------------|------------------------------------|
| 117 - 136   | 2136.8484 | 2135.8411 | 2135.9306 | -42 | 0    | K.YGWTAF <b>CGPVGAHGQPS</b> CGK.C | ( <a href="#">Ions score 86</a> )  |
| 153 - 170   | 2020.8995 | 2019.8922 | 2019.9684 | -38 | 0    | R.IVDQCSNGGLDLDVNVFR.Q            | ( <a href="#">Ions score 109</a> ) |
| 171 - 181   | 1281.5601 | 1280.5528 | 1280.5997 | -37 | 1    | R. <b>QLD</b> TDGKGYER.G          | ( <a href="#">Ions score 25</a> )  |

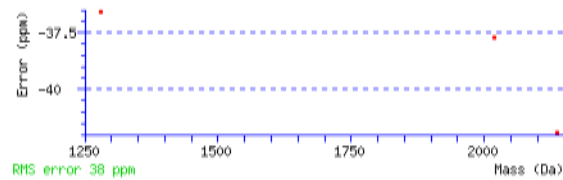

Spot No.: **76**

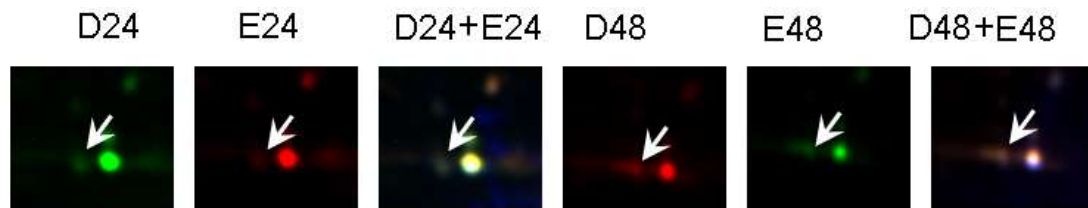

Accession No.: **scaffold0155\_515853.mRNA1**

Plant species: ***Hevea brasiliensis***

Protein name: **Pro-hevein**

**Peptide sequences:** **K.YGWTAFCGPVGAHGPSCGK.C;**

**R.IVDQCSNGGLDLVDNVFR.Q**

PFF Mascot score: **[149]**

Sequence coverage %: **[18]**

Matched peptides No.: **[2]**

Calculated Mr: **23042**

Calculated pI: **8.15**

### Annotated PFF spectra:

Ions score is  $-10 \cdot \log(P)$ , where P is the probability that the observed match is a random event.

Individual ions scores  $> 31$  indicate identity or extensive homology ( $p < 0.05$ ).

Protein scores are derived from ions scores as a non-probabilistic basis for ranking protein hits.

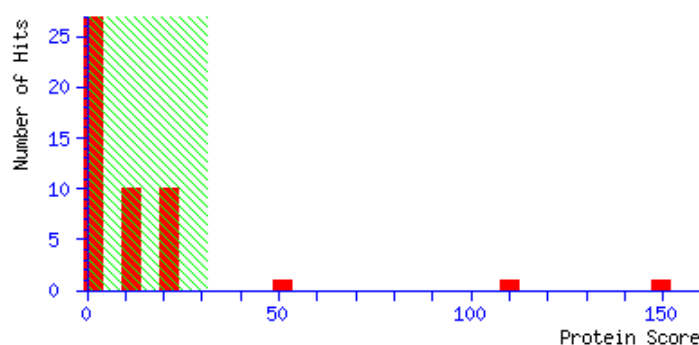

Matched peptide sequences: shown in **Bold Red**

```
1 MGRVMNIFIV VLLCLTGVAI AEQCGRQAGG KLCPNNLCCS QYGWCGSSDD
51 YCSPSKNCQS NCKGGGGGGG GGGGSASNVL ATYHLYNPQQ HGWDLNAVSA
101 YCSTWDANKP YSWRSKYGWT AFCGPVGAHG QPSCGKCLSV TNTGTGAKTT
151 VRIVDQCSNG GLDLNVNFR QLDIDGKGYE RGHLTVNYQF VNCGDSFNPL
201 FSIMKSSVIN
```

Matched peptide information:

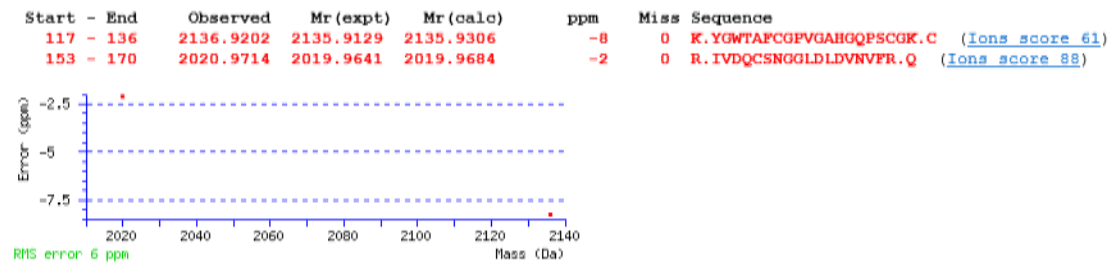



Spot No.: **77**

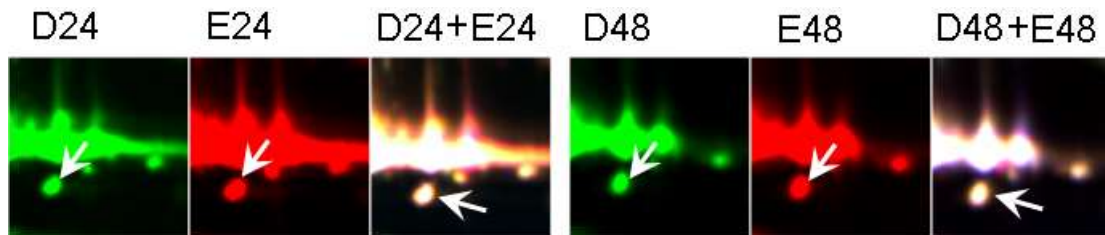

Accession No.: **scaffold0014\_190374.mRNA1**

Plant species: ***Hevea brasiliensis***

Protein name: **Cysteine proteinase inhibitor**

**Peptide sequences:** **K.EVEGSANSVEINSLAR.Y; R.YAVDDYNQK.Q;**

**K.QNALLEFK.K; K.QQVVAGTIYYITLEVTDGGQK.K;**

**K.QQVVAGTIYYITLEVTDGGQK.V; K.VWEKPWLNFK.E**

PFF Mascot score: **[667]**

Sequence coverage %: **[64]**

Matched peptides No.: **[6]**

Calculated Mr: **11236**

Calculated pI: **5.45**

### **Annotated PFF spectra:**

Ions score is  $-10 \cdot \log(P)$ , where P is the probability that the observed match is a random event.

Individual ions scores  $> 31$  indicate identity or extensive homology ( $p < 0.05$ ).

Protein scores are derived from ions scores as a non-probabilistic basis for ranking protein hits.

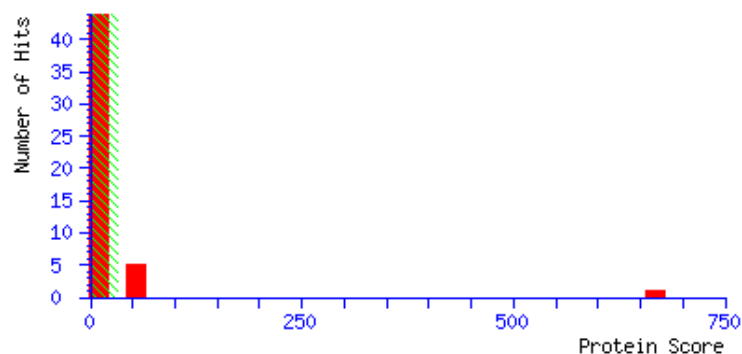

Matched peptide sequences: shown in **Bold Red**

1 MAKLGGV**KEV EGSANSVEIN SLARYAVDDY NQKQNALLEF KKV**VNAK**QQV**  
51 **VAGTIYYITL EVTDGGQKKV** YEAK**VWEK**PW LNFKEVQEFK LIGDAPSDST  
101 A

Matched peptide information:

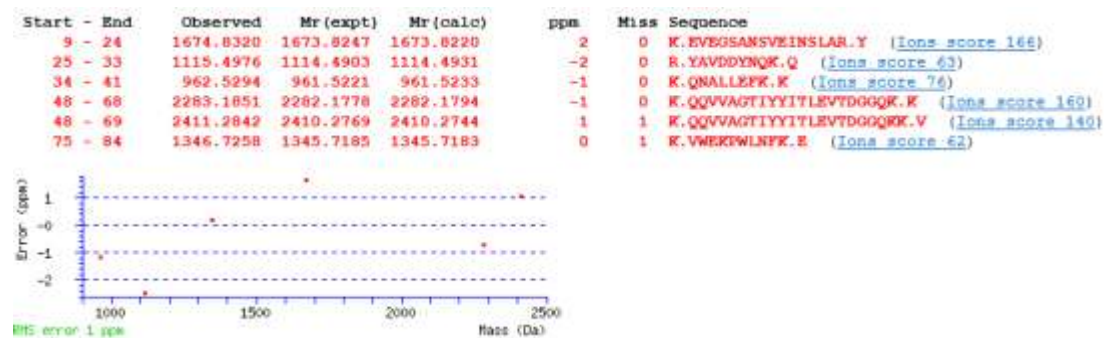

Spot No.: **78**

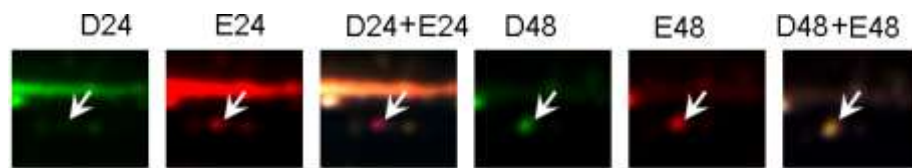

Accession No.: **scaffold0824\_253044.mRNA1**

Plant species: ***Hevea brasiliensis***

Protein name: **Nuclear transport factor 2**

**Peptide sequences:** **K.AFVEHYTTFDANR.A;**  
**R.AGLANLYQEGSMLTFEGQK.I; K.FSQMFHLIPTPQGSFYVLNDIFR.L**

PFF Mascot score: **[252]** Sequence coverage %: **[45]**

Matched peptides No.: **[3]**

Calculated Mr: **13696**

Calculated pI: **5.68**

### Annotated PFF spectra:

Ions score is  $-10 \cdot \log(P)$ , where P is the probability that the observed match is a random event.  
Individual ions scores  $> 30$  indicate identity or extensive homology ( $p < 0.05$ ).  
Protein scores are derived from ions scores as a non-probabilistic basis for ranking protein hits.

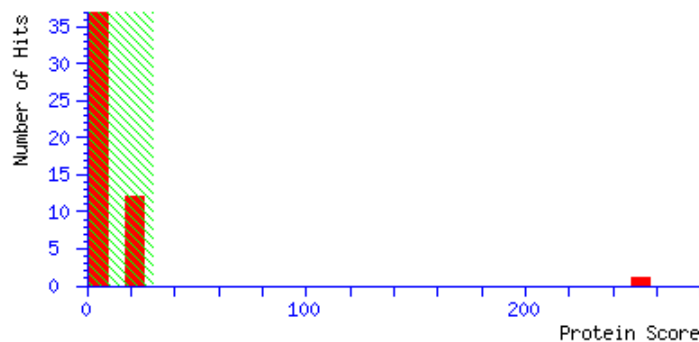

Matched peptide sequences: shown in **Bold Red**

1 MEPDSVAK**AF VEHYYTTFDA NRAGLANLYQ EGSMLTFEGQ** KIQGAQNIVA  
51 KLISLPFQQC QHSITTVDQC PSGPAGGMLV FVSGNLQLTG EQHALK**FSQM**  
101 **FHLIPTQGS FYVLNDIFRL** NYA

Matched peptide information:

| Start - End | Observed  | Mr (expt) | Mr (calc) | ppm | Miss Sequence                                |
|-------------|-----------|-----------|-----------|-----|----------------------------------------------|
| 9 - 22      | 1733.7362 | 1732.7269 | 1732.7845 | -32 | 0 K.AFVEHYTTFDANR.A (ions score 55)          |
| 23 - 41     | 2056.9285 | 2055.9212 | 2055.9935 | -35 | 0 R.AGLANLYQEGSMLTFEGQK.I (ions score 90)    |
| 97 - 119    | 2757.2979 | 2756.2906 | 2756.3785 | -32 | 0 K.FSQMFHLIPTQGSEYVLNDIFR.L (ions score 63) |

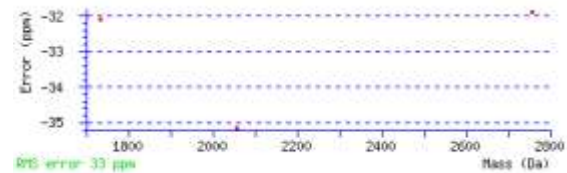

Spot No.: **79**

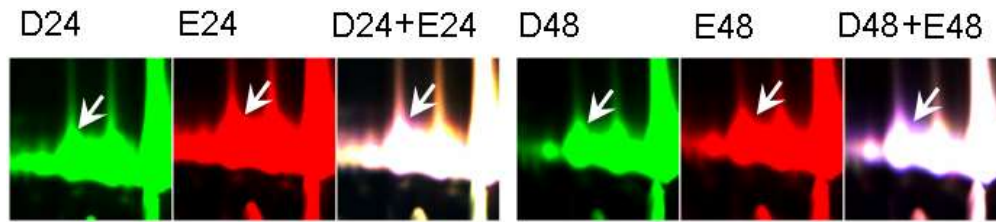

Accession No.: **scaffold1222\_136753.mRNA1**

Plant species: ***Hevea brasiliensis***

Protein name: **Rubber elongation factor protein**

**Peptide sequences:** **K.DKSGPLQPGVDIEGPVK.N;**  
**K.SGPLQPGVDIEGPVKNAVPLYNR.F; K.NVAVPLYNR.F; K.FVDSTVVASVTIHDR.S;**  
**K.DASIQVVS AIR.A**

PFF Mascot score: **[372]** Sequence coverage %: **[38]**

Matched peptides No.: **[5]**

Calculated Mr: **14713** Calculated pI: **5.04**

### **Annotated PFF spectra:**

Ions score is  $-10 \cdot \log(P)$ , where P is the probability that the observed match is a random event.  
Individual ions scores  $> 31$  indicate identity or extensive homology ( $p < 0.05$ ).  
Protein scores are derived from ions scores as a non-probabilistic basis for ranking protein hits.

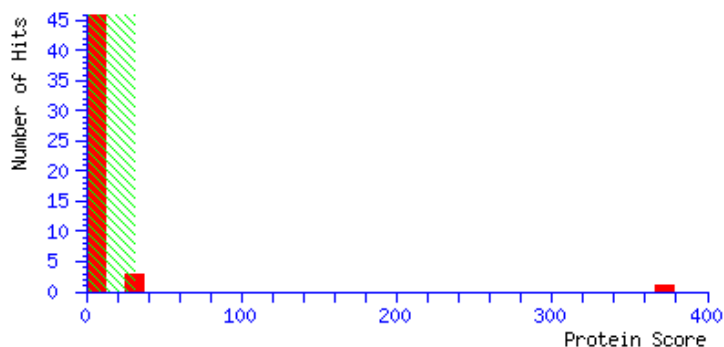

Matched peptide sequences: shown in **Bold Red**

```
1 MAEDEDNQGG QGEGCLKYLG FQDAATYAVT TFSNVYLFAK DKSGPLQPGV
51 DIIEGPKVNV AVPLYNRF SY IPNGALKFVD STVVASVTII DRSLPPIVKD
101 ASIQVVSAR AAPEAARSLA SSLPGQTKIL AKVIFYGEN
```

Matched peptide information:

| Start - End | Observed  | Mr(expt)  | Mr(calc)  | ppm | Miss Sequence                                   |
|-------------|-----------|-----------|-----------|-----|-------------------------------------------------|
| 41 - 58     | 1849.0927 | 1848.0854 | 1847.9993 | 47  | 1 K.DKSGPLQPGVDIIEGPKV.N (Ions score 76)        |
| 43 - 67     | 2632.5703 | 2631.5630 | 2631.4384 | 47  | 1 K.SGFLQPGVDIIEGPKVNVAVPLYNR.F (Ions score 35) |
| 59 - 67     | 1045.6227 | 1044.6154 | 1044.5716 | 42  | 0 K.NVAVPLYNR.F (Ions score 60)                 |
| 78 - 92     | 1621.9495 | 1620.9422 | 1620.8723 | 43  | 0 K.FVDSTVVASVTIIDR.S (Ions score 132)          |
| 100 - 110   | 1158.6958 | 1157.6885 | 1157.6404 | 42  | 0 K.DASIQVVSAR.A (Ions score 75)                |

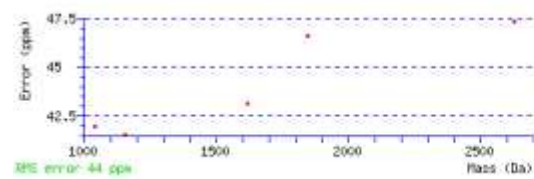

Supplement: s1 [file s1]
