# Supplementary material for: Proteomic Landscape Has Revealed Small Rubber Particles Are Crucial Rubber Biosynthetic Machines for Ethylene-Stimulation in Natural Rubber Production
Source: MDPI journal article supplement (doi:10.3390/ijms20205082), 2019-10-14
Supplement: s1 [file s1]

**Figure S3: Phosphopeptides and phosphorylation amino acid sites in different REF and SRPP isoforms**

Protein name: [REF138](#)

Location of the [six](#) spots identified as [REF138](#) by MS from 2-D DIGE gels:

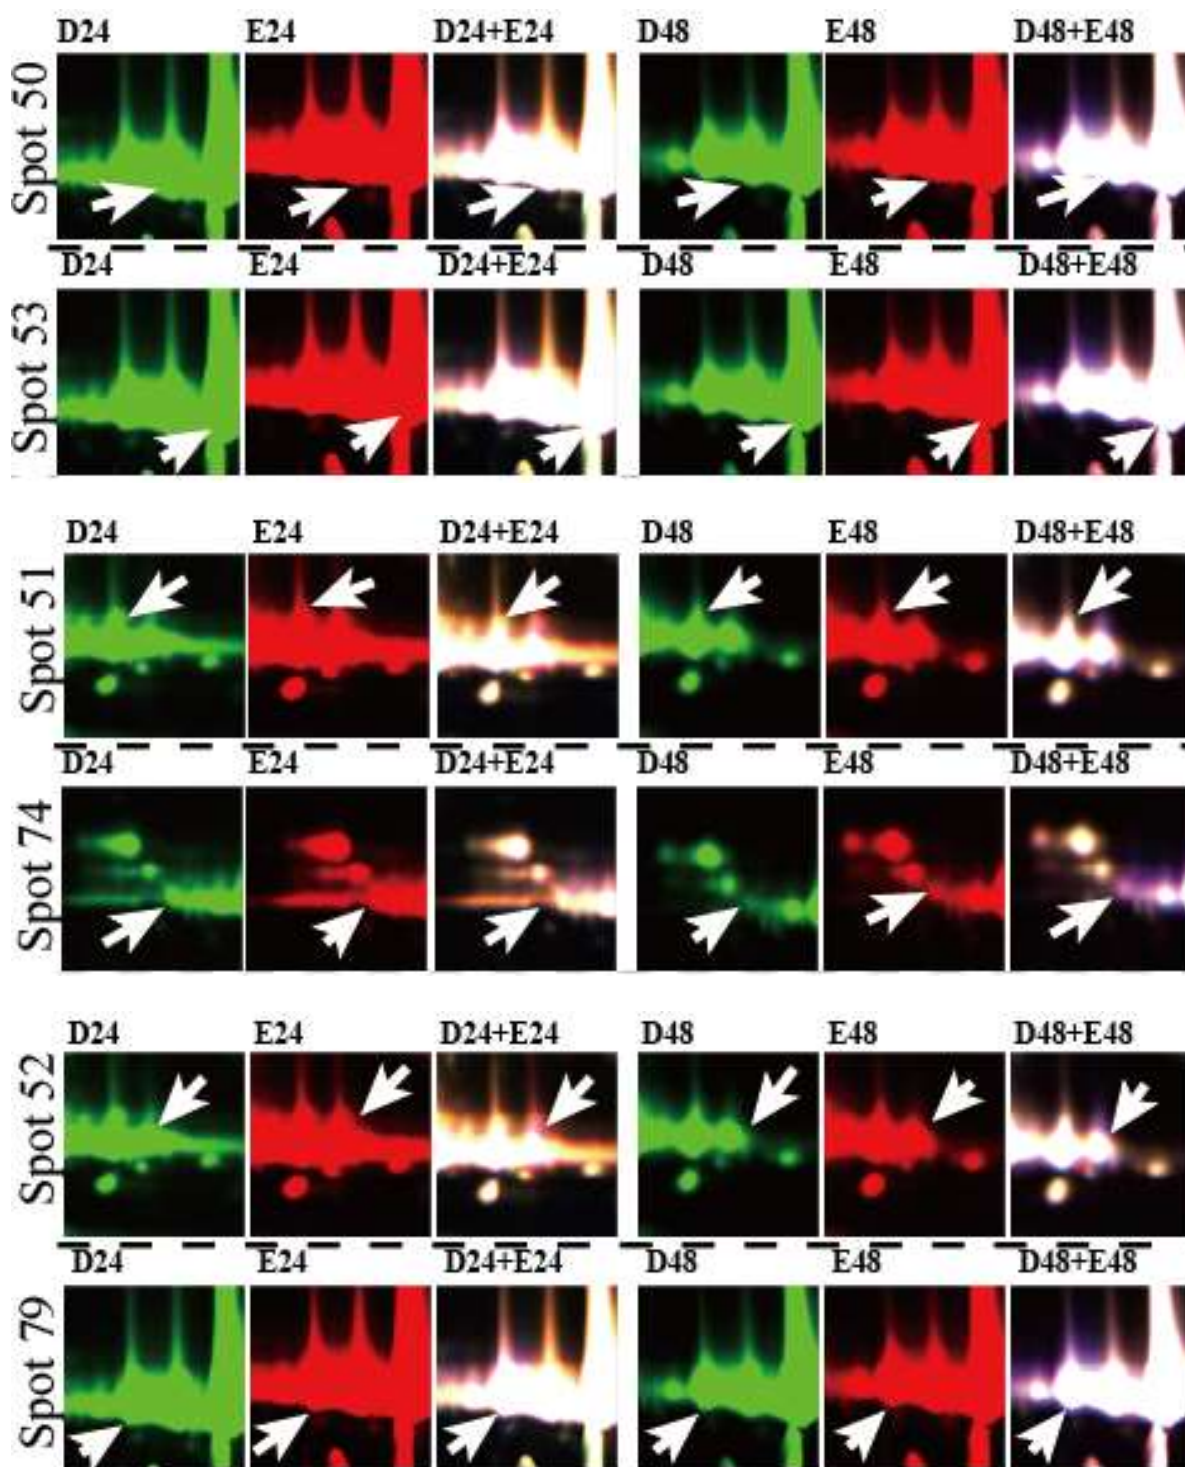

Detail information for phosphorylation of amino acid sites in [REF138](#):

|      | Spot 50                                                                    | Spot 51 | Spot 52 | Spot 53 | Spot 74 | Spot 79 | Share |
|------|----------------------------------------------------------------------------|---------|---------|---------|---------|---------|-------|
| D24h | MAEDEDNQGGQGEGLKYLGFVQDAATYAVITFSNVYLFAKDKSGPLQPGVDIIEGPVKNAVPLYNRFSYIPNGA |         |         |         |         |         |       |
| E24h | MAEDEDNQGGQGEGLKYLGFVQDAATYAVITFSNVYLFAKDKSGPLQPGVDIIEGPVKNAVPLYNRFSYIPNGA |         |         |         |         |         |       |
| D48h | MAEDEDNQGGQGEGLKYLGFVQDAATYAVITFSNVYLFAKDKSGPLQPGVDIIEGPVKNAVPLYNRFSYIPNGA |         |         |         |         |         |       |
| E48h | MAEDEDNQGGQGEGLKYLGFVQDAATYAVITFSNVYLFAKDKSGPLQPGVDIIEGPVKNAVPLYNRFSYIPNGA |         |         |         |         |         |       |
| D24h | LKFVDSITVVASVTIIDRSLPPIVKDASIQVVS                                          |         |         |         |         |         |       |
| E24h | LKFVDSITVVASVTIIDRSLPPIVKDASIQVVS                                          |         |         |         |         |         |       |
| D48h | LKFVDSITVVASVTIIDRSLPPIVKDASIQVVS                                          |         |         |         |         |         |       |
| E48h | LKFVDSITVVASVTIIDRSLPPIVKDASIQVVS                                          |         |         |         |         |         |       |

Predicted 3-D structure and phosphorylated amino acids in different [REF138](#) isoforms:

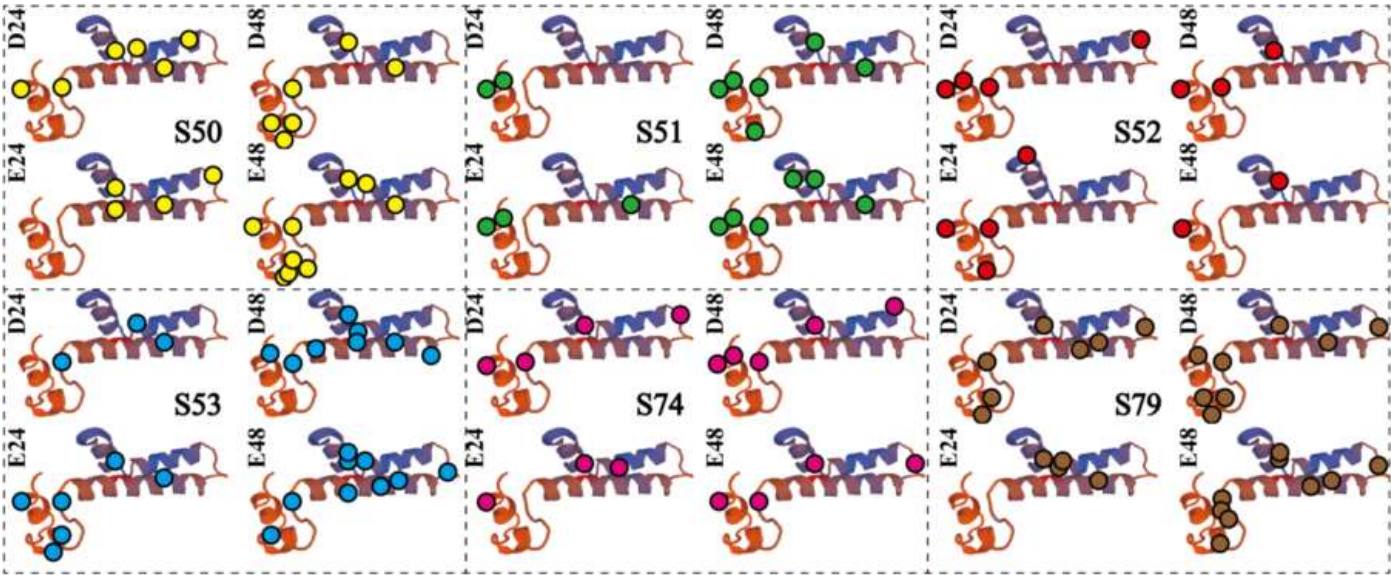

Spot No. 50

Changed pattern on DIGE gel:

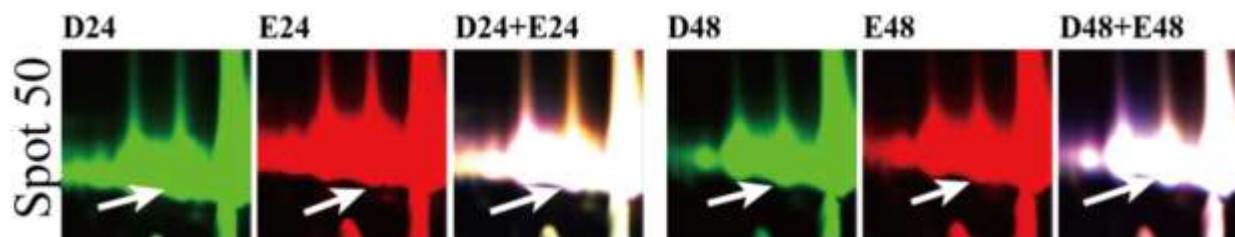

Location in rubber genome: scaffold1222\_136753.mRNA1

Protein name: Rubber elongation factor protein/REF138

Predicted 3-D structure and phosphorylated amino acids:

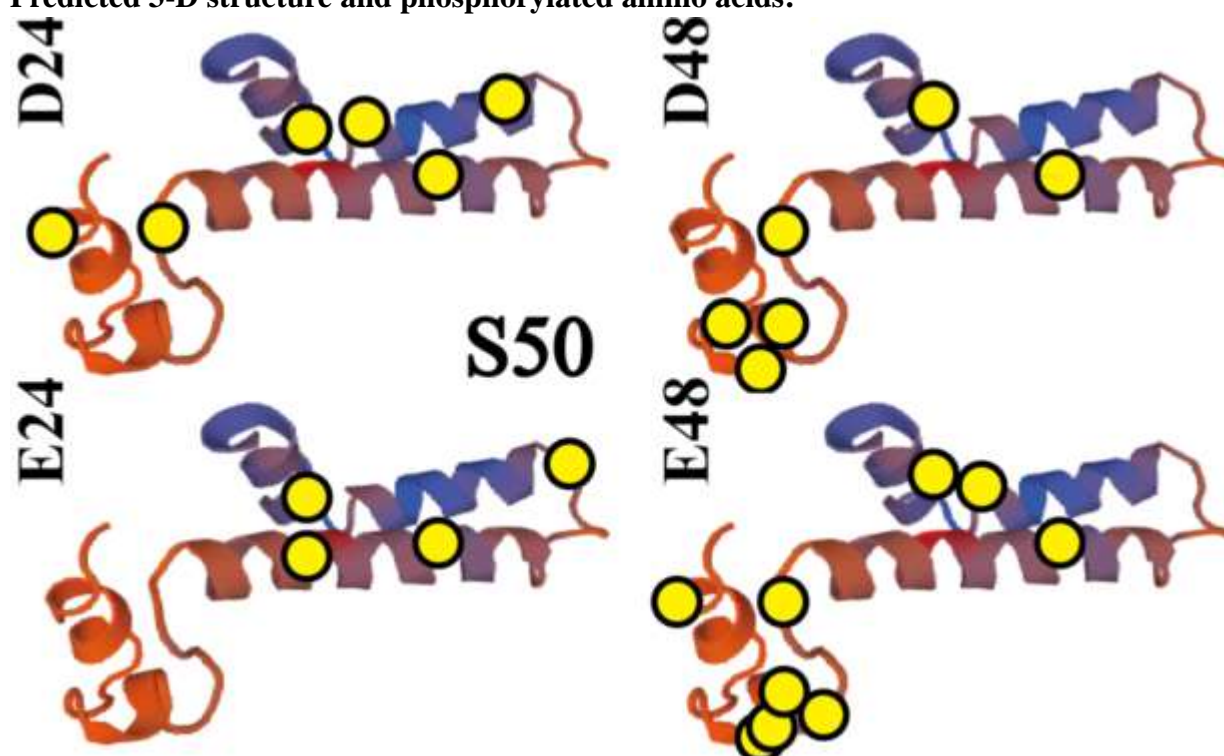

Detail information for phosphorylation of amino acid sites:

D24: MAEDEDNQGGQGEGLKYLGFVQDAATYAVTTFSNVYLFADKSGPLQPGVDIEGPVKNVAVPLYNRFSYIPNGA

E24: MAEDEDNQGGQGEGLKYLGFVQDAATYAVTTFSNVYLFADKSGPLQPGVDIEGPVKNVAVPLYNRFSYIPNGA

D48: MAEDEDNQGGQGEGLKYLGFVQDAATYAVTTFSNVYLFADKSGPLQPGVDIEGPVKNVAVPLYNRFSYIPNGA

E48: MAEDEDNQGGQGEGLKYLGFVQDAATYAVTTFSNVYLFADKSGPLQPGVDIEGPVKNVAVPLYNRFSYIPNGA

D24: LKFVDSSTVVASVTIIDRSLPPIVKDASIQVVSATRAAPEAARSLASSLPGGTKILAKVIFYGEN

E24: LKFVDSSTVVASVTIIDRSLPPIVKDASIQVVSATRAAPEAARSLASSLPGGTKILAKVIFYGEN

D48: LKFVDSSTVVASVTIIDRSLPPIVKDASIQVVSATRAAPEAARSLASSLPGGTKILAKVIFYGEN

E48: LKFVDSSTVVASVTIIDRSLPPIVKDASIQVVSATRAAPEAARSLASSLPGGTKILAKVIFYGEN



Spot No. 51

Changed pattern on DIGE gel:

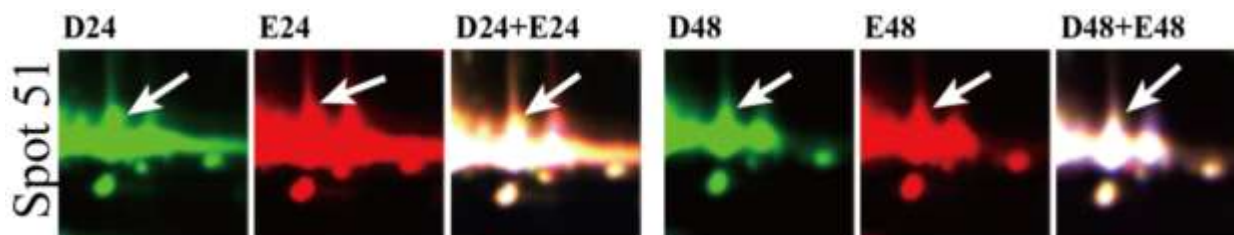

Location in rubber genome: scaffold1222\_136753.mRNA1

Protein name: Rubber elongation factor protein/REF138

Predicted 3-D structure and phosphorylated amino acids:

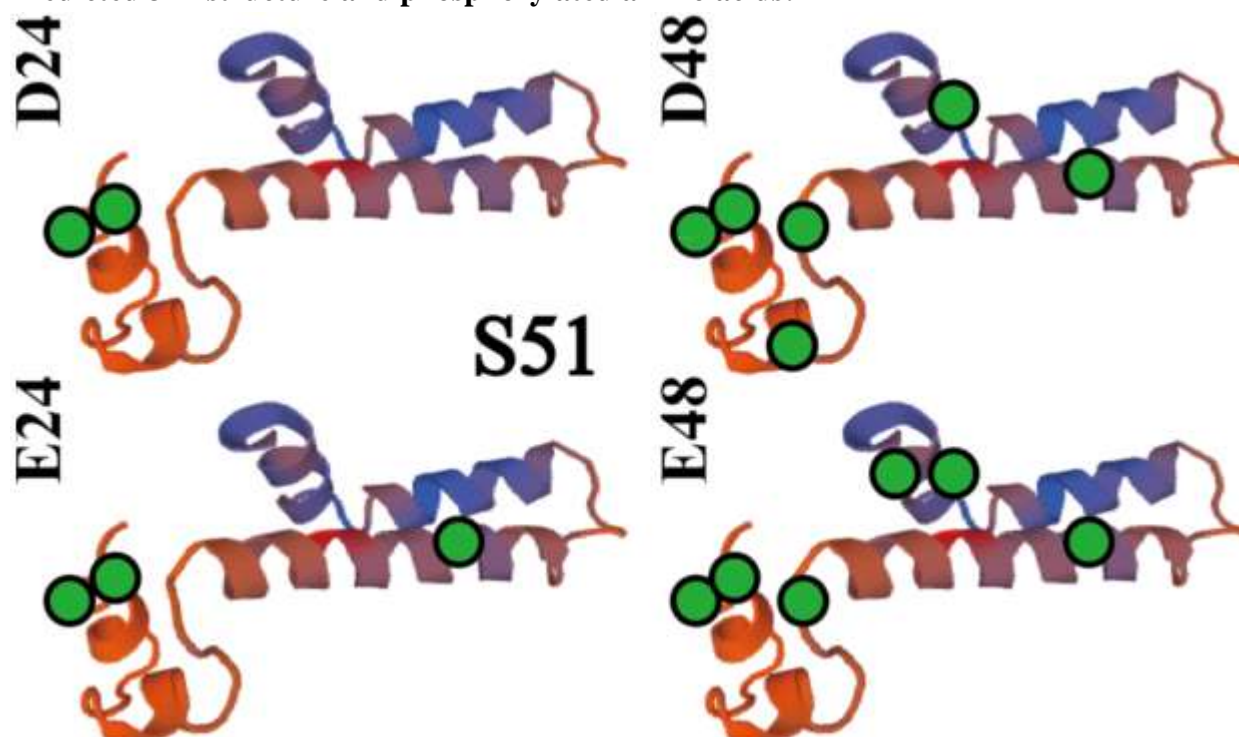

Detail information for phosphorylation of amino acid sites:

D24: MAEDEDNQGGQGEGLKYLGFVQDAATYAVTTFSNVYLFADKSGPLQPGVDIIEGPVKNVAVPLYNRFSYIPNGA

E24: MAEDEDNQGGQGEGLKYLGFVQDAATYAVTTFSNVYLFADKSGPLQPGVDIIEGPVKNVAVPLYNRFSYIPNGA

D48: MAEDEDNQGGQGEGLKYLGFVQDAATYAVTTFSNVYLFADKSGPLQPGVDIIEGPVKNVAVPLYNRFSYIPNGA

E48: MAEDEDNQGGQGEGLKYLGFVQDAATYAVTTFSNVYLFADKSGPLQPGVDIIEGPVKNVAVPLYNRFSYIPNGA

D24: LKFVDSTVVASVTIIDRSLPPIVKDASIQVVSATRAAPEAARSLASSLPGQTKILAKVIFYGEN

E24: LKFVDSTVVASVTIIDRSLPPIVKDASIQVVSATRAAPEAARSLASSLPGQTKILAKVIFYGEN

D48: LKFVDSTVVASVTIIDRSLPPIVKDASIQVVSATRAAPEAARSLASSLPGQTKILAKVIFYGEN

E48: LKFVDSTVVASVTIIDRSLPPIVKDASIQVVSATRAAPEAARSLASSLPGQTKILAKVIFYGEN

Spot No. 52

Changed pattern on DIGE gel:

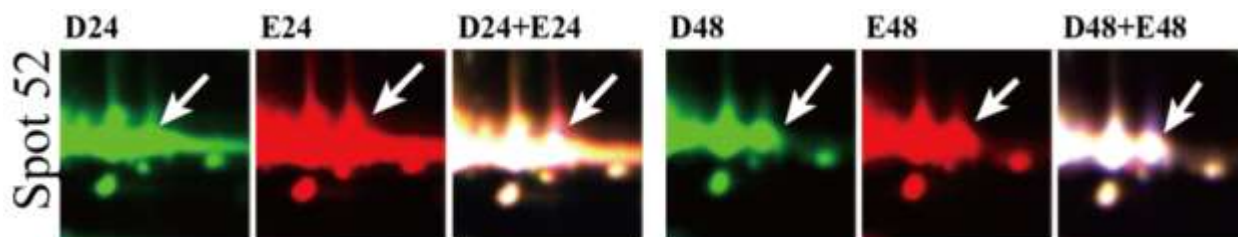

Location in rubber genome: scaffold1222\_136753.mRNA1

Protein name: Rubber elongation factor protein/REF138

Predicted 3-D structure and phosphorylated amino acids:

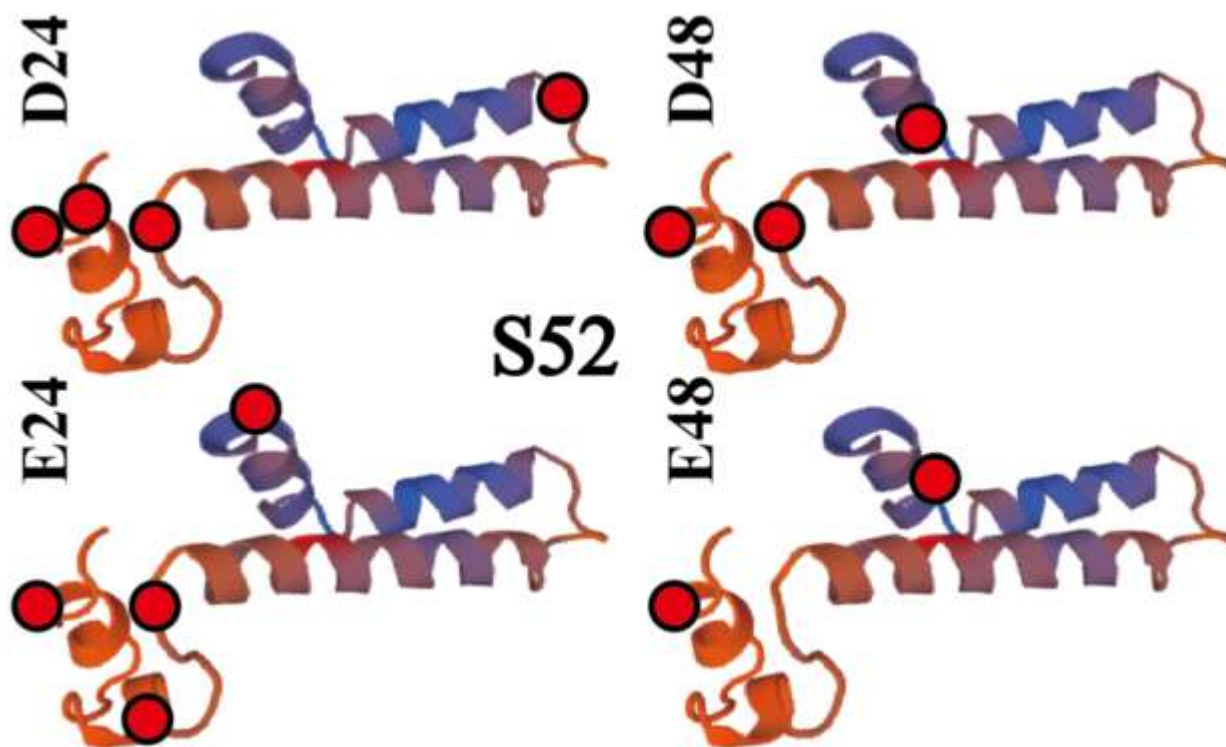

Detail information for phosphorylation of amino acid sites:

D24: MAEDEDNQQQGEGGLKYLGFVQDAATYAVTTFSNVYLFADKSGPLQPGVDIEGPVKNVAVPLYNRFSYIPNGA

E24: MAEDEDNQQQGEGGLKYLGFVQDAATYAVTTFSNVYLFADKSGPLQPGVDIEGPVKNVAVPLYNRFSYIPNGA

D48: MAEDEDNQQQGEGGLKYLGFVQDAATYAVTTFSNVYLFADKSGPLQPGVDIEGPVKNVAVPLYNRFSYIPNGA

E48: MAEDEDNQQQGEGGLKYLGFVQDAATYAVTTFSNVYLFADKSGPLQPGVDIEGPVKNVAVPLYNRFSYIPNGA

D24: LKFVDSTVVASVTIIDRSLPPIVKDASIQVVSARIAAPEAARSLASSLPGQTKILAKVIFYGEN

E24: LKFVDSTVVASVTIIDRSLPPIVKDASIQVVSARIAAPEAARSLASSLPGQTKILAKVIFYGEN

D48: LKFVDSTVVASVTIIDRSLPPIVKDASIQVVSARIAAPEAARSLASSLPGQTKILAKVIFYGEN

E48: LKFVDSTVVASVTIIDRSLPPIVKDASIQVVSARIAAPEAARSLASSLPGQTKILAKVIFYGEN

Spot No. 53

Changed pattern on DIGE gel:

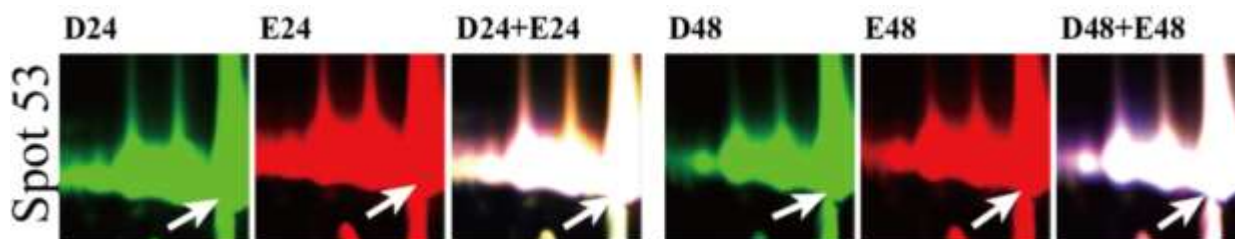

Location in rubber genome: scaffold1222\_136753.mRNA1

Protein name: Rubber elongation factor protein/REF138

Predicted 3-D structure and phosphorylated amino acids:

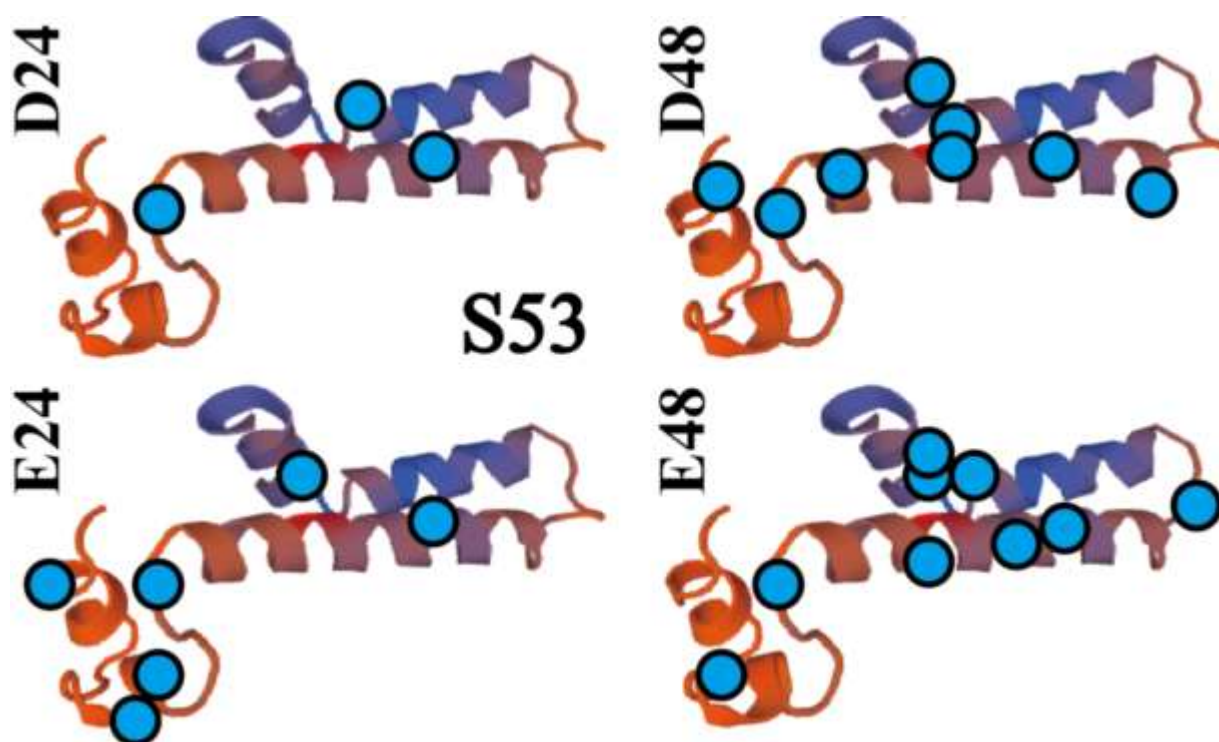

Detail information for phosphorylation of amino acid sites:

D24: MAEDEDNQQQGEGGLKYLGFVQDAATYAVTTFSNVYLFADKSGPLQPGVDIEGPVKNVAVPLYNRFSYIPNGA

E24: MAEDEDNQQQGEGGLKYLGFVQDAATYAVTTFSNVYLFADKSGPLQPGVDIEGPVKNVAVPLYNRFSYIPNGA

D48: MAEDEDNQQQGEGGLKYLGFVQDAATYAVTTFSNVYLFADKSGPLQPGVDIEGPVKNVAVPLYNRFSYIPNGA

E48: MAEDEDNQQQGEGGLKYLGFVQDAATYAVTTFSNVYLFADKSGPLQPGVDIEGPVKNVAVPLYNRFSYIPNGA

D24: LKFVDSSTVVASVTIIDRSLPPIVKDASIQVVSATRAAPEAARSLASSLPQGQTKILAKVIFYGEN

E24: LKFVDSSTVVASVTIIDRSLPPIVKDASIQVVSATRAAPEAARSLASSLPQGQTKILAKVIFYGEN

D48: LKFVDSSTVVASVTIIDRSLPPIVKDASIQVVSATRAAPEAARSLASSLPQGQTKILAKVIFYGEN

E48: LKFVDSSTVVASVTIIDRSLPPIVKDASIQVVSATRAAPEAARSLASSLPQGQTKILAKVIFYGEN



Spot No. 74

Changed pattern on DIGE gel:

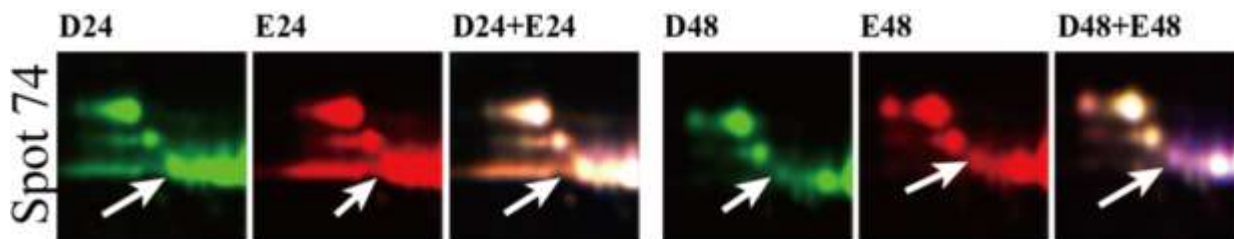

Location in rubber genome: scaffold1222\_136753.mRNA1

Protein name: Rubber elongation factor protein/REF138

Predicted 3-D structure and phosphorylated amino acids:

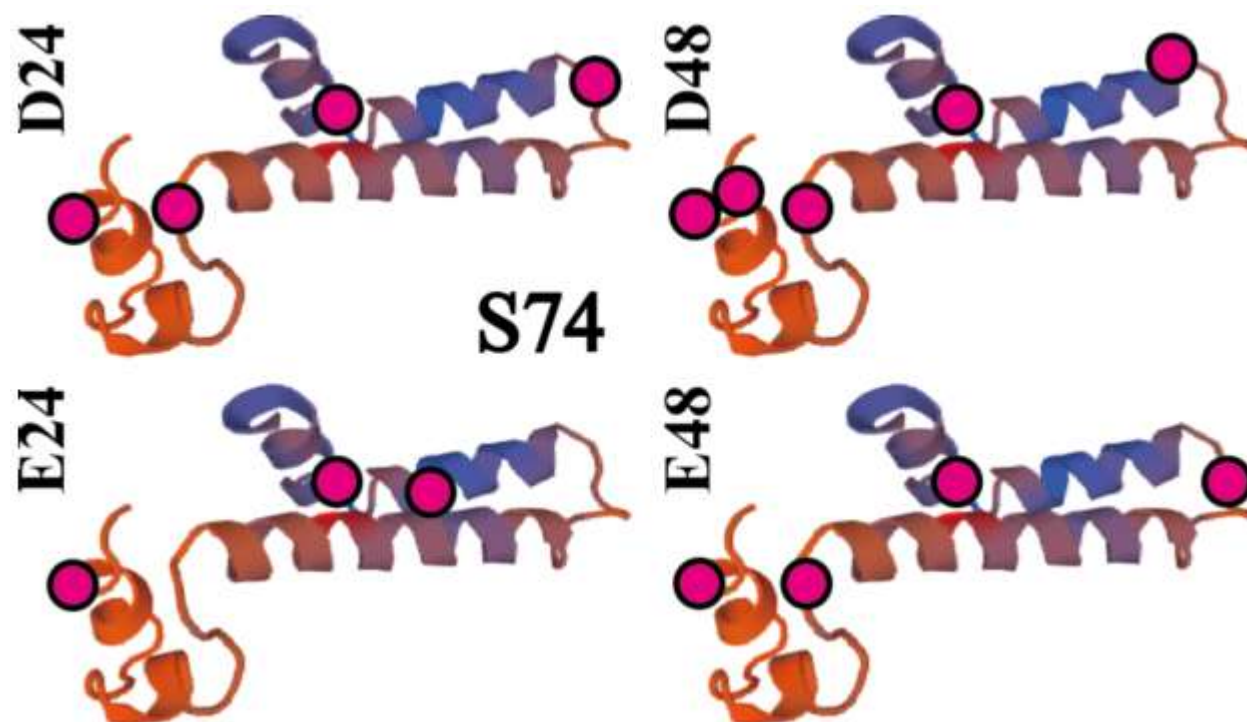

Detail information for phosphorylation of amino acid sites:

D24: MAEDEDNQQQGQEGGLKYLGFVQDAATYAVTTFSNVYLFADKSGPLQPGVDIEGPVKNVAVPLYNRFSYIPNGA

E24: MAEDEDNQQQGQEGGLKYLGFVQDAATYAVTTFSNVYLFADKSGPLQPGVDIEGPVKNVAVPLYNRFSYIPNGA

D48: MAEDEDNQQQGQEGGLKYLGFVQDAATYAVTTFSNVYLFADKSGPLQPGVDIEGPVKNVAVPLYNRFSYIPNGA

E48: MAEDEDNQQQGQEGGLKYLGFVQDAATYAVTTFSNVYLFADKSGPLQPGVDIEGPVKNVAVPLYNRFSYIPNGA

D24: LKFVDSTVVASVTIIDRSLPPIVKDASIQVVS AIRAAPEAARSLASSLPGQT KILAKVIFYGEN

E24: LKFVDSTVVASVTIIDRSLPPIVKDASIQVVS AIRAAPEAARSLASSLPGQT KILAKVIFYGEN

D48: LKFVDSTVVASVTIIDRSLPPIVKDASIQVVS AIRAAPEAARSLASSLPGQT KILAKVIFYGEN

E48: LKFVDSTVVASVTIIDRSLPPIVKDASIQVVS AIRAAPEAARSLASSLPGQT KILAKVIFYGEN

Spot No. 79

Changed pattern on DIGE gel:

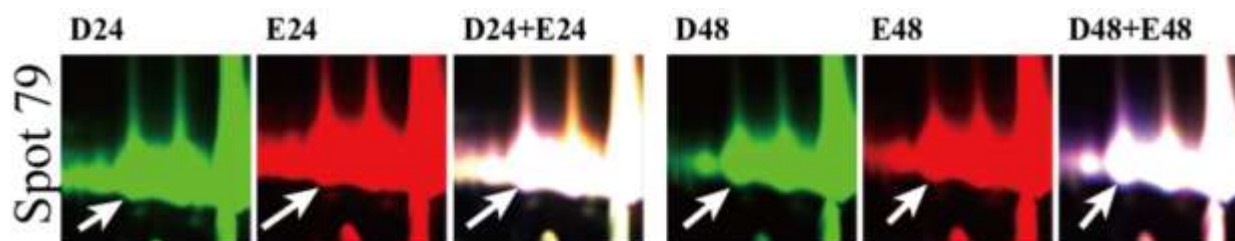

Location in rubber genome: scaffold1222\_136753.mRNA1

Protein name: Rubber elongation factor protein/REF138

Predicted 3-D structure and phosphorylated amino acids:

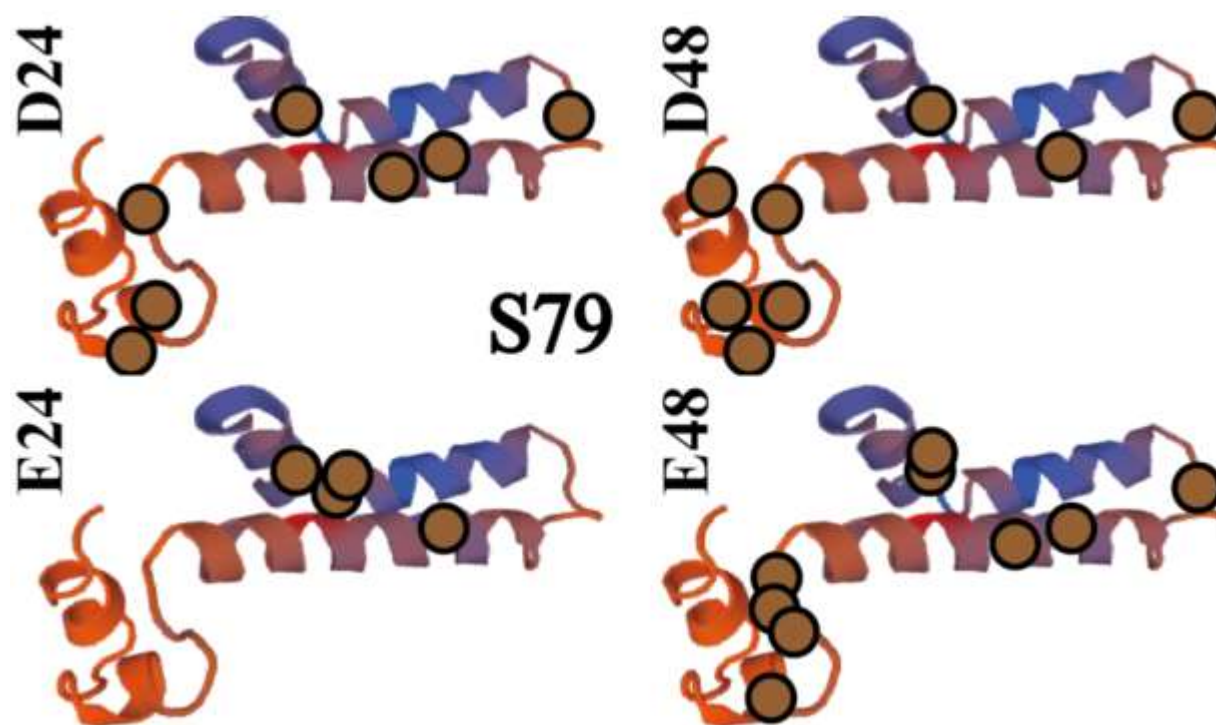

Detail information for phosphorylation of amino acid sites:

D24: MAEDEDNQQGQGEGLKYLGFVQDAATYAVTTFSSNVYLFAKDKSGPLQPGVDIEGPVKNVAVPLYNRFSYIPNGA

E24: MAEDEDNQQGQGEGLKYLGFVQDAATYAVTTFSSNVYLFAKDKSGPLQPGVDIEGPVKNVAVPLYNRFSYIPNGA

D48: MAEDNQQGQGEGLKYLGFVQDAATYAVTTFSSNVYLFAKDKSGPLQPGVDIEGPVKNVAVPLYNRFSYIPNGA

E48: MAEDEDNQQGQGEGLKYLGFVQDAATYAVTTFSSNVYLFAKDKSGPLQPGVDIEGPVKNVAVPLYNRFSYIPNGA

D24: LKFVDSSTVVASVTIIDRSLPPIVKDASIQQVVSATRAAPEAARSLASSLPGGTKILAKVIFYGEN

E24: LKFVDSSTVVASVTIIDRSLPPIVKDASIQQVVSATRAAPEAARSLASSLPGGTKILAKVIFYGEN

D48: LKFVDSSTVVASVTIIDRSLPPIVKDASIQQVVSATRAAPEAARSLASSLPGGTKILAKVIFYGEN

E48: LKFVDSSTVVASVTIIDRSLPPIVKDASIQQVVSATRAAPEAARSLASSLPGGTKILAKVIFYGEN



Protein name: [REF175](#)

Location of the [two](#) spots identified as [REF175](#) by MS from 2-D DIGE gels:

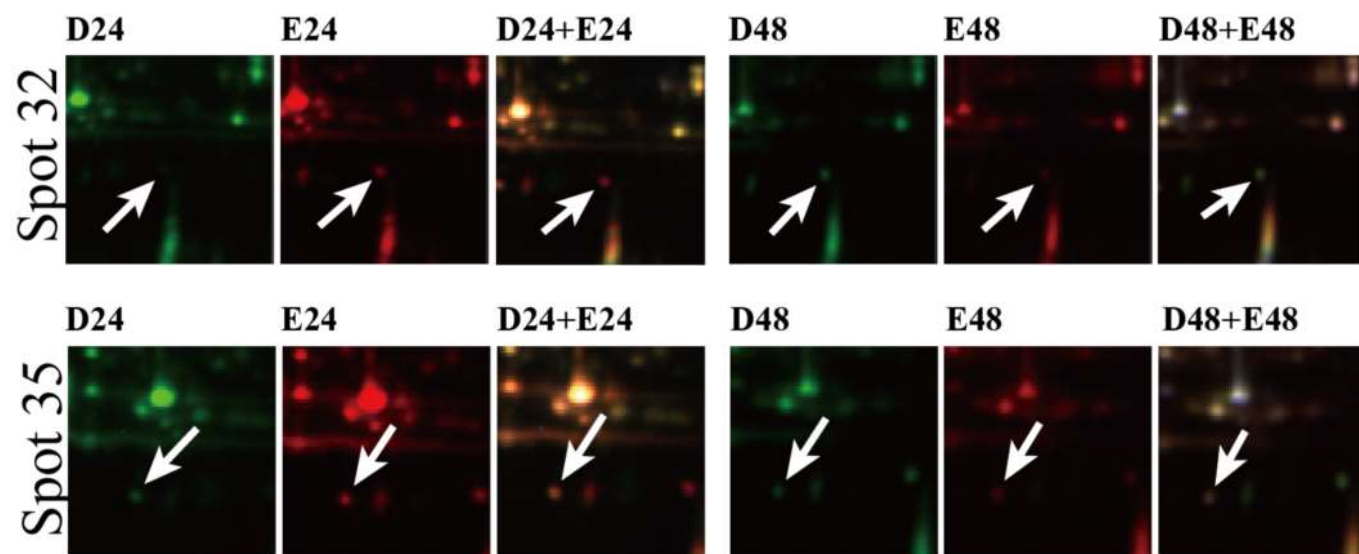

Detail information for phosphorylation of amino acid sites in [REF175](#):

### Spot 32 Spot 35

|      |                                                                                              |
|------|----------------------------------------------------------------------------------------------|
| D24h | MAEGEEVNIOEEANKGEENPOEEANIOEETNKGEENIOEEANIOEEANKEEESLKYLDLFVQAATVYARASFSKLYLFAKDKS          |
| E24h | MAEGEEVNIOEEANKGEENPOEEANIOEETNKGEENIOEEANIOEEANKEEESLKYLDLFVQAATVYARASFSKLYLFAKDKS          |
| D48h | MAEGEEVNIOEEANKGEENPOEEANIOEETNKGEENIOEEANIOEEANKEEESLKYLDLFVQAATVYARASFSKLYLFAKDKS          |
| E48h | MAEGEEVNIOEEANKGEENPOEEANIOEETNKGEENIOEEANIOEEANKEEESLKYLDLFVQAATVYARASFSKLYLFAKDKS          |
| D24h | GPFKPGVNTVESRFKSVVRPVYNKFQVPVKNVLFADRRVDAYVTVLDRIVPPIVKRASIQAYSVAPGAARAVASYLPLHTKRL SKVLYGDG |
| E24h | GPFKPGVNTVESRFKSVVRPVYNKFQVPVKNVLFADRRVDAYVTVLDRIVPPIVKRASIQAYSVAPGAARAVASYLPLHTKRL SKVLYGDG |
| D48h | GPFKPGVNTVESRFKSVVRPVYNKFQVPVKNVLFADRRVDAYVTVLDRIVPPIVKRASIQAYSVAPGAARAVASYLPLHTKRL SKVLYGDG |
| E48h | GPFKPGVNTVESRFKSVVRPVYNKFQVPVKNVLFADRRVDAYVTVLDRIVPPIVKRASIQAYSVAPGAARAVASYLPLHTKRL SKVLYGDG |

Predicted 3-D structure and phosphorylated amino acids in different [REF175](#) isoforms:

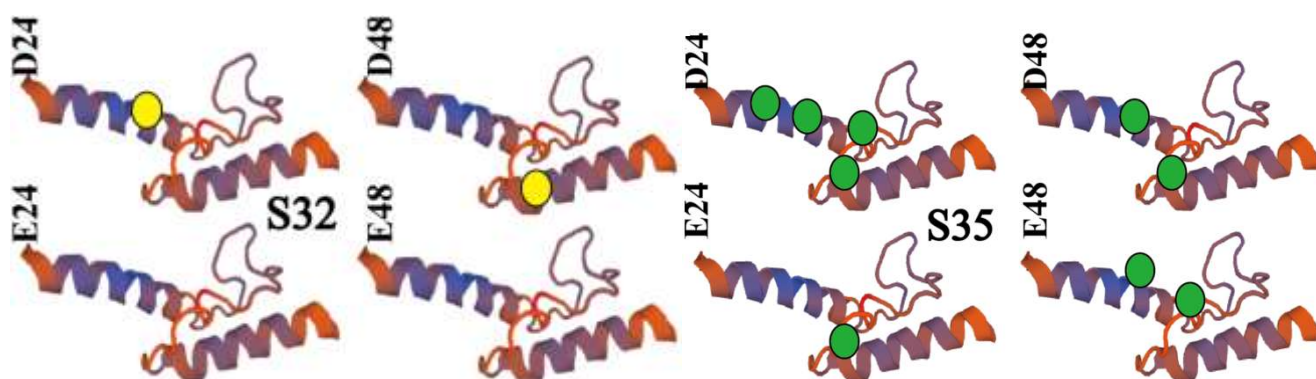

Spot No. 32

Changed pattern on DIGE gel:

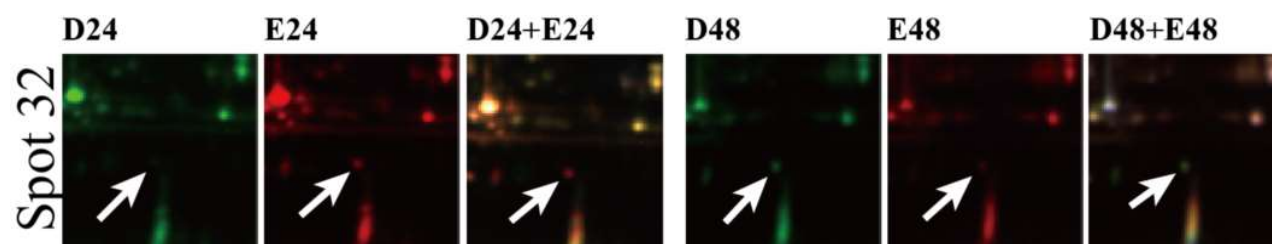

Location in rubber genome: scaffold1222\_100110.mRNA1

Protein name: Rubber elongation factor protein/REF175

Predicted 3-D structure and phosphorylated amino acids:

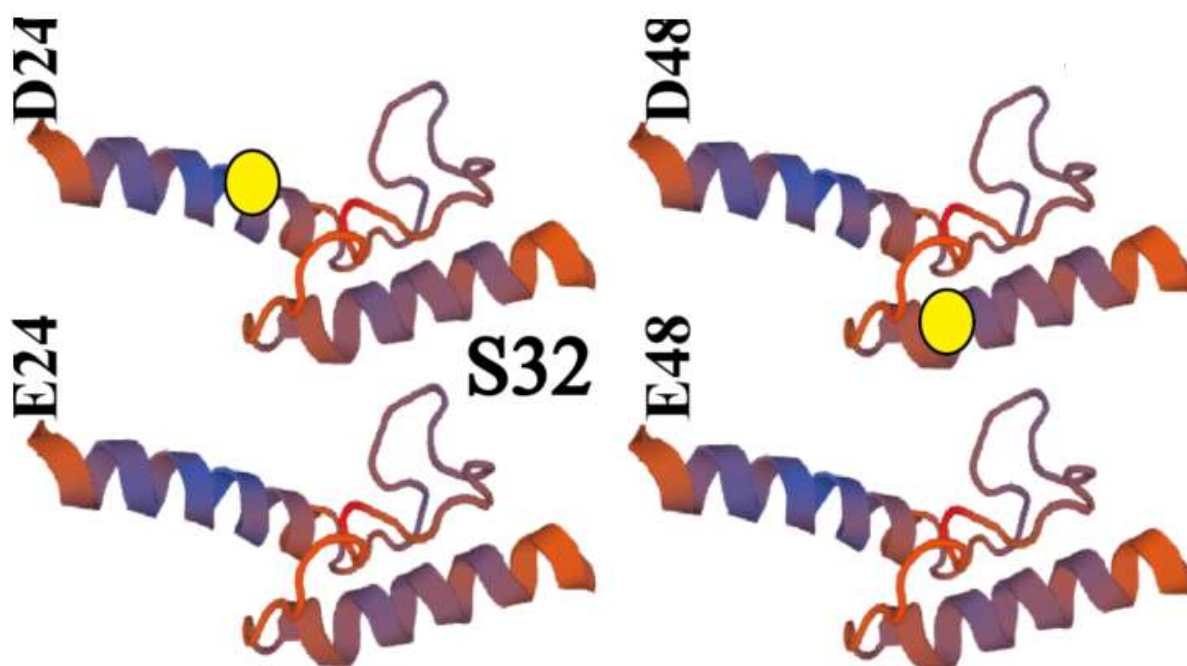

Detail information for phosphorylation of amino acid sites:

D24: MAEGEEVNIIQEEANKGEENPQEEANIQEETNKGEENIQEEANIQEEANKEEESLKYLDFVQAATVYARASFSKL

E24: MAEGEEVNIIQEEANKGEENPQEEANIQEETNKGEENIQEEANIQEEANKEEESLKYLDFVQAATVYARASFSKL

D48: MAEGEEVNIIQEEANKGEENPQEEANIQEETNKGEENIQEEANIQEEANKEEESLKYLDFVQAATVYARASFSKL

E48: MAEGEEVNIIQEEANKGEENPQEEANIQEETNKGEENIQEEANIQEEANKEEESLKYLDFVQAATVYARASFSKL

D24: YLFAKDKSGPFKPGVNTVESRFKSVVRPVYNKFQVPVKNVLFADRRVDAYVTVLDRIVPPIVKRASIQAYSVAP

E24: YLFAKDKSGPFKPGVNTVESRFKSVVRPVYNKFQVPVKNVLFADRRVDAYVTVLDRIVPPIVKRASIQAYSVAP

D48: YLFAKDKSGPFKPGVNTVESRFKSVVRPVYNKFQVPVKNVLFADRRVDAYVTVLDRIVPPIVKRASIQAYSAP

E48: YLFAKDKSGPFKPGVNTVESRFKSVVRPVYNKFQVPVKNVLFADRRVDAYVTVLDRIVPPIVKRASIQAYSVAP

D24: GAARAVASYLPLHTKRLSKVLYGDG

E24: GAARAVASYLPLHTKRLSKVLYGDG

D48: GAARAVASYLPLHTKRLSKVLYGDG

E48: GAARAVASYLPLHTKRLSKVLYGDG

Spot No. 35

Changed pattern on DIGE gel:

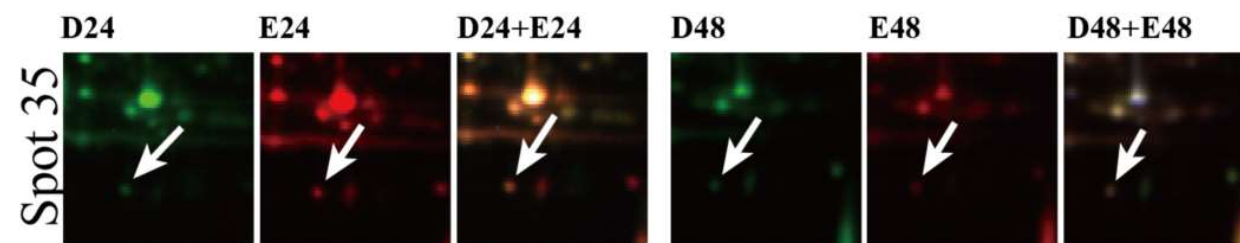

Location in rubber genome: scaffold1222\_100110.mRNA1

Protein name: Rubber elongation factor protein/REF175

Predicted 3-D structure and phosphorylated amino acids:

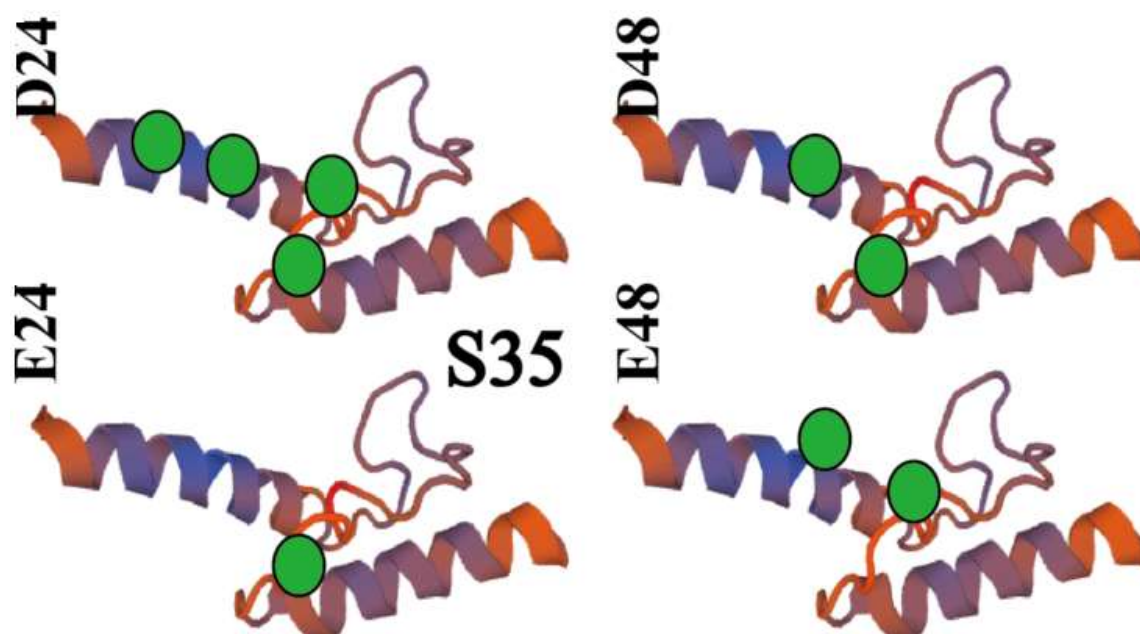

Detail information for phosphorylation of amino acid sites:

D24: MAEGEEVN IQEEANKGEENPQEEANIQEETNKGEENIQEEANIQEEANKEEESLKYLD FVQAATVYARASF SKL

E24: MAEGEEVN IQEEANKGEENPQEEANIQEETNKGEENIQEEANIQEEANKEEESLKYLD FVQAATVYARASF SKL

D48: MAEGEEVN IQEEANKGEENPQEEANIQEETNKGEENIQEEANIQEEANKEEESLKYLD FVQAATVYARASF SKL

E48: MAEGEEVN IQEEANKGEENPQEEANIQEETNKGEENIQEEANIQEEANKEEESLKYLD FVQAATVYARASF SKL

D24: YLFAKDKSGPFPKPGVNTVESRFKSVVRPVYNKFQVPVKNVLFADRRVDAYVTVLDRIVPPIVKRASIQAYSVAP

E24: YLFAKDKSGPFPKPGVNTVESRFKSVVRPVYNKFQVPVKNVLFADRRVDAYVTVLDRIVPPIVKRASIQAYSVAP

D48: YLFAKDKSGPFPKPGVNTVESRFKSVVRPVYNKFQVPVKNVLFADRRVDAYVTVLDRIVPPIVKRASIQAYSVAP

E48: YLFAKDKSGPFPKPGVNTVESRFKSVVRPVYNKFQVPVKNVLFADRRVDAYVTVLDRIVPPIVKRASIQAYSVAP

D24: GAARAVASYLPLHTKRLSKVLYGDG

E24: GAARAVASYLPLHTKRLSKVLYGDG

D48: GAARAVASYLPLHTKRLSKVLYGDG

E48: GAARAVASYLPLHTKRLSKVLYGDG



Protein name: [REF258](#)

Location of the [five](#) spots identified as [REF258](#) by MS from 2-D DIGE gels:

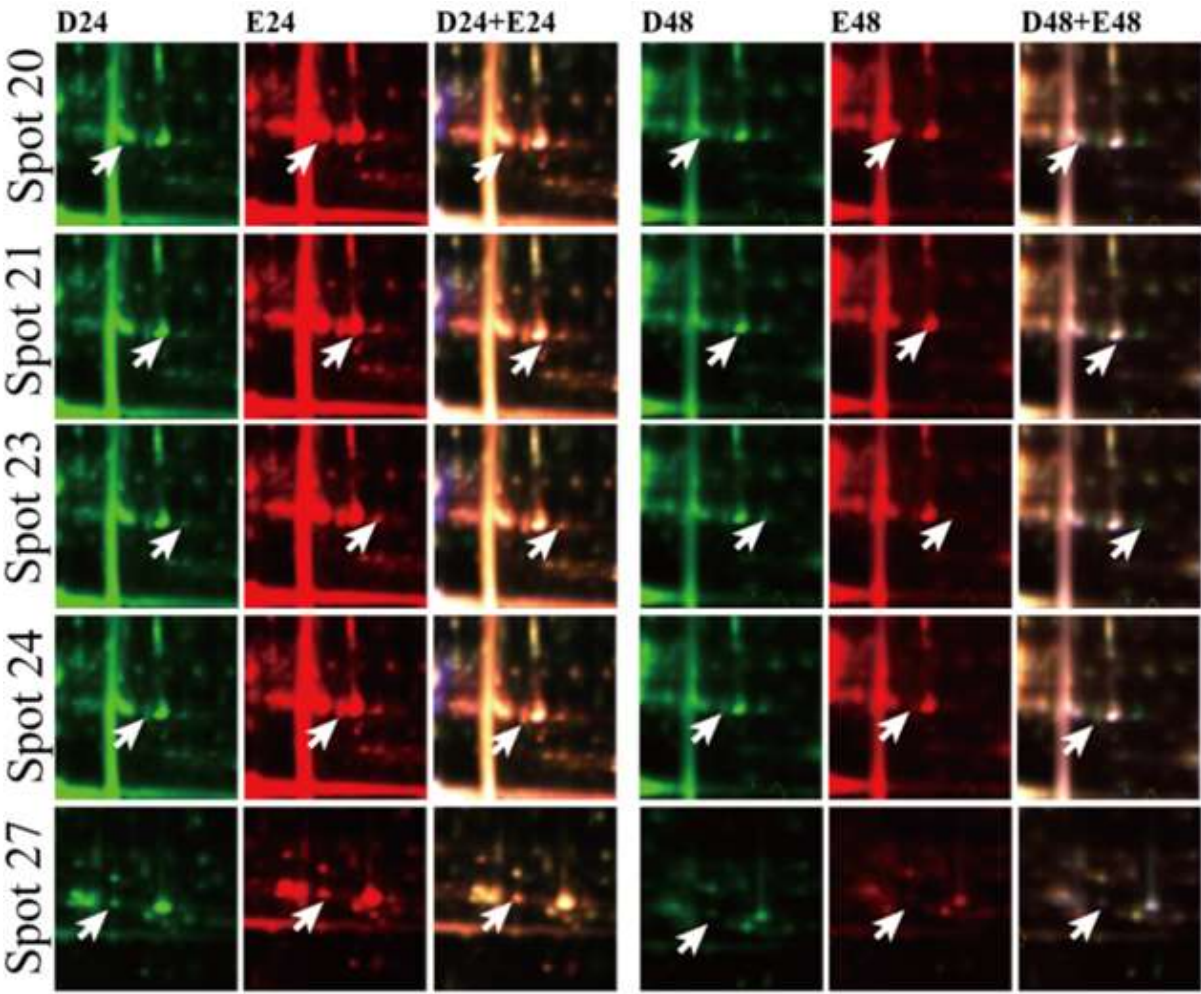

Detail information for phosphorylation of amino acid sites in [REF258](#):

|      | Spot 20                                              | Spot 21                                                                             | Spot 23                    | Spot 24                    | Spot 27 | Share |
|------|------------------------------------------------------|-------------------------------------------------------------------------------------|----------------------------|----------------------------|---------|-------|
| D24h | MASLLGAASNVINAASNVVEEAVKGVENAQQEVANAVSNPSNIVKDVASAA  | DIVEEAAKGVENVQKEVANAVSNSSNIVKDVASAA                                                 | DIVEEAAKVVVDNVQQGVV        | SAASNVVEEAAKGVGNQEKVDDEEED |         |       |
| E24h | MASLLGAASNVINAASNVVEEAVKGVENAQQEVANAVSNPSNIVKDVASAA  | DIVEEAAKGVENVQKEVANAVSNSSNIVKDVASAATDIVEEAAKVVVDNVQQGVV                             | SAASNVVEEAAKGVGNQEKVDDEEED |                            |         |       |
| D48h | MASLLGAASNVINAASNVVEEAVKGVENAQQEVANAVSNPSNIVKDVASAAT | DIVEEAAKGVENVQKEVANAVSNSSNIVKDVASAATDIVEEAAKVVVDNVQQGVV                             | SAASNVVEEAAKGVGNQEKVDDEEED |                            |         |       |
| E48h | MASLLGAASNVINAASNVVEEAVKGVENAQQEVANAVSNPSNIVKDVASAAT | DIVEEAAKGVENVQKEVANAVSNSSNIVKDVASAATDIVEEAAKVVVDNVQQGVV                             | SAASNVVEEAAKGVGNQEKVDDEEED |                            |         |       |
| D24h | DEEJ TLKYLDIVQAALVLALVSSSKLYLFVKDKSGPLKPGVD          | AEVTIKSVVRPFYRFDVDPNKVLKFADNQVDASVTLVLRYPVVKQVSTRAYSVARNAPRAALALVSYLPLPTNRLCKLLSEDK |                            |                            |         |       |
| E24h | DEEJ TLKYLDIVQAALVLALVSSSKLYLFVKDKSGPLKPGVD          | AEVTIKSVVRPFYRFDVDPNKVLKFADNQVDASVTLVLRYPVVKQVSTRAYSVARNAPRAALALVSYLPLPTNRLCKLLSEDK |                            |                            |         |       |
| D48h | DEEJ TLKYLDIVQAALVLALVSSSKLYLFVKDKSGPLKPGVD          | AEVTIKSVVRPFYRFDVDPNKVLKFADNQVDASVTLVLRYPVVKQVSTRAYSVARNAPRAALALVSYLPLPTNRLCKLLSEDK |                            |                            |         |       |
| E48h | DEEJ TLKYLDIVQAALVLALVSSSKLYLFVKDKSGPLKPGVD          | AEVTIKSVVRPFYRFDVDPNKVLKFADNQVDASVTLVLRYPVVKQVSTRAYSVARNAPRAALALVSYLPLPTNRLCKLLSEDK |                            |                            |         |       |

Predicted 3-D structure and phosphorylated amino acids in different [REF258](#) isoforms:

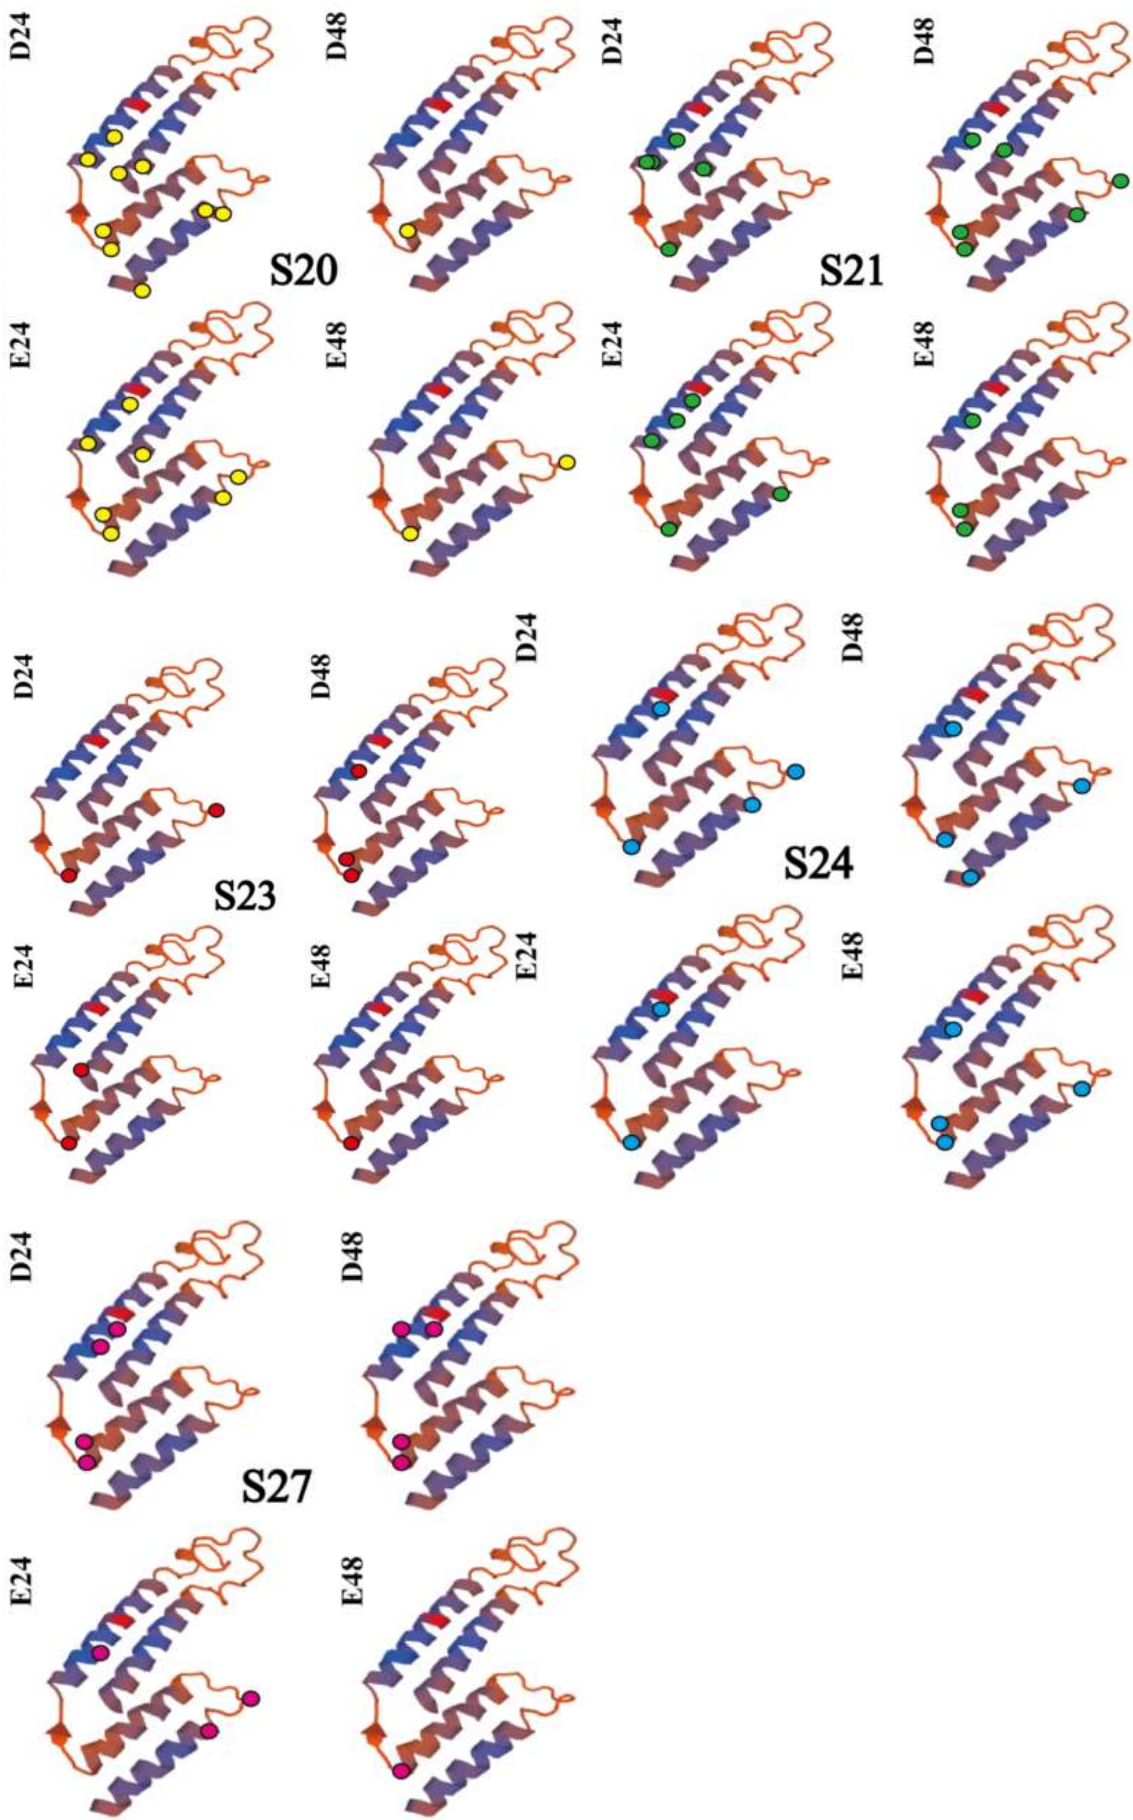



## Spot No. 20

Changed pattern on DIGE gel:

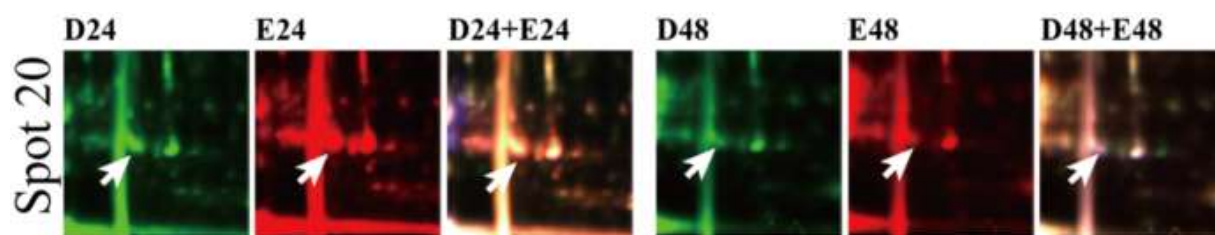

**Location in rubber genome:** scaffold1222\_175215.mRNA1

**Protein name:** Rubber elongation factor protein/REF258

**Predicted 3-D structure and phosphorylated amino acids:**

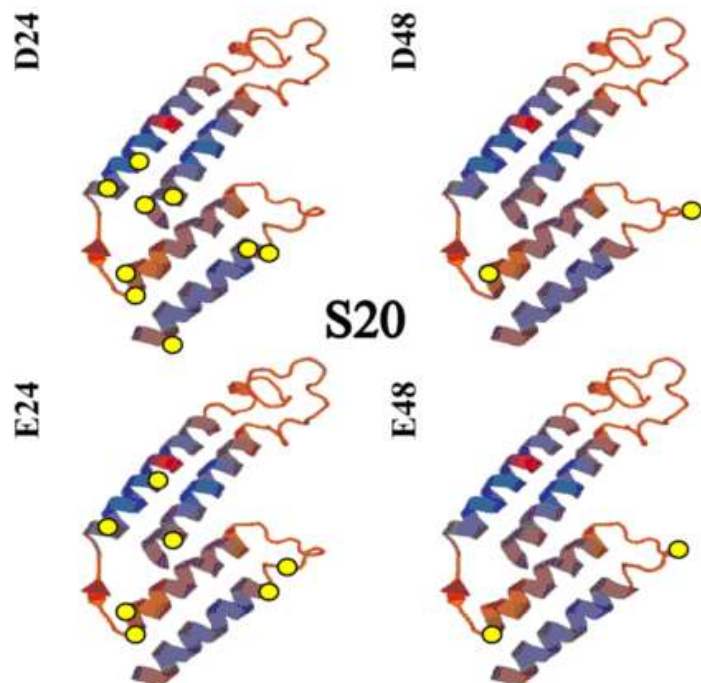

**Detail information for phosphorylation of amino acid sites:**

D24: MASLLGAASNVINAASNVEEAVKGVENAQQEVANAVSNPSNIVKDVASAATDIVEEAAKGVENVQKEVANAVSN

E24: MASLLGAASNVAASNVEEAVKGVENAQQEVANAVSNPSNIVKDVASAATDIVEEAAKGVENVQKEVANAVSN

D48: MASLLGAASNVAASNVEEAVKGVENAQQEVANAVSNPSNIVKDVASAATDIVEEAAKGVENVQKEVANAVSN

E48: MASLLGAASNVAASNVEEAVKGVENAQQEVANAVSNPSNIVKDVASAATDIVEEAAKGVENVQKEVANAVSN

D24: SSNIVKDVASAATDIVEEAAKVVDNVQQGVVSAASNVEEAAKGVGNIQEKVDDEEEDTLKYLDIVQAALVLALV

E24: SSNIVKDVASAATDIVEEAAKVVDNVQQGVVSAASNVEEAAKGVGNIQEKVDDEEEDTLKYLDIVQAALVLALV

D48: SSNIVKDVASAATDIVEEAAKVVDNVQQGVVSAASNVEEAAKGVGNIQEKVDDEEEDTLKYLDIVQAALVLALV

E48: SSNIVKDVASAATDIVEEAAKVVDNVQQGVVSAASNVEEAAKGVGNIQEKVDDEEEDTLKYLDIVQAALVLALV

D24: SSSKLYLFVKDKSGPLKPGVDTAEVTIKSVVRPFYRFHDPNPKVLKFADNQVDASVTLVLRYPVVKQVSTRA

E24: SSSKLYLFVKDKSGPLKPGVDTAEVTIKSVVRPFYRFHDPNPKVLKFADNQVDASVTLVLRYPVVKQVSTRA

D48: SSSKLYLFVKDKSGPLKPGVDTAEVTIKSVVRPFYRFHDPNPKVLKFADNQVDASVTLVLRYPVVKQVSTRA

E48: SSSKLYLFVKDKSGPLKPGVDTAEVTIKSVVRPFYRFHDPNPKVLKFADNQVDASVTLVLRYPVVKQVSTRA

D24: YSVARNAPRAALALVSYLPLPTNRLCKLLSEDK

E24: YSVARNAPRAALALVSYLPLPTNRLCKLLSEDK

D48: YSVARNAPRAALALVSYLPLPTNRLCKLLSEDK

E48: YSVARNAPRAALALVSYLPLPTNRLCKLLSEDK



## Spot No. 21

Changed pattern on DIGE gel:

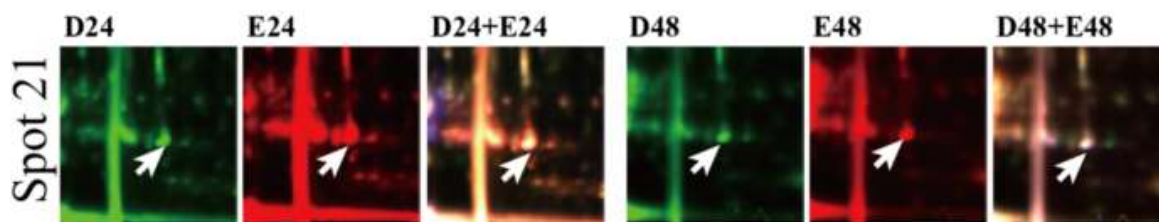

**Location in rubber genome:** scaffold1222\_175215.mRNA1

**Protein name:** Rubber elongation factor protein/REF258

**Predicted 3-D structure and phosphorylated amino acids:**

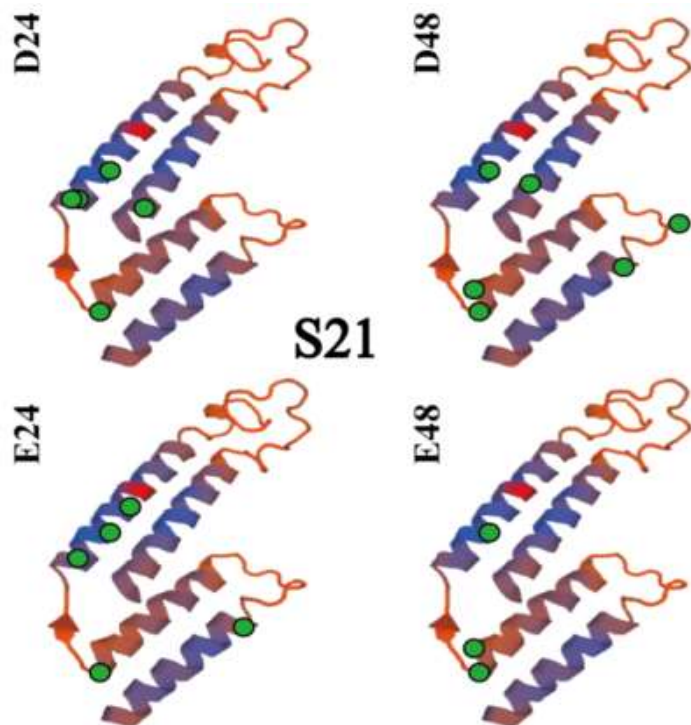

Detail information for phosphorylation of amino acid sites:

D24: MASLLGAASNVINAASNVEEAVKGVENAQQEVANAVSNPSNIVKDVASAATDIVEEAAKGVENVQKEVANAVSN  
**E24:** MASLLGAASNVINAASNVEEAVKGVENAQQEVANAVSNP**S**NIVKDVASAATDIVEEAAKGVENVQKEVANAVSN  
D48: MASLLGAASNVINAASNVEEAVKGVENAQQEVANAVSNP**S**NIVKDVASAAT**T**DIVEEAAKGVENVQKEVANAVSN  
**E48:** MASLLGAASNVINAASNVEEAVKGVENAQQEVANAVSNPSNIVKDVASAATDIVEEAAKGVENVQKEVANAVSN  
D24: SSNIVKDVASAATDIVEEAAKVVDNVQQGVVSAAS**S**NVVEEAAKGVGNIQEKVDDEEEDTLKYLDIVQAALVLALV  
**E24:** SSNIVKDVASAATDIVEEAAKVVDNVQQGVVSAAS**S**NVVEEAAKGVGNIQEKVDDEEEDTLKYLDIVQAALVLALV  
D48: SSNIVKDVASAATDIVEEAAKVVDNVQQGVV**S**AA**S**NVVEEAAKGVGNIQEKVDDEEEDTLKYLDIVQAALVLALV  
**E48:** SSNIVKDVASAATDIVEEAAKVVDNVQQGVV**S**AA**S**NVVEEAAKGVGNIQEKVDDEEEDTLKYLDIVQAALVLALV  
D24: **S****S**KLFLFKDK**S**GPLKPGVDTAEVTIKSVVRPFYRFHDPNPKVLKFADNQVDASVTLVRLRYAPPVVKQVSTRA  
**E24:** **S****S**KLFLFKDK**S**GPLKPGVD**T**AEVTIKSVVRPFYRFHDPNPKVLKFADNQVDASVTLVRLRYAPPVVKQVSTRA  
D48: **S****S**KLFLFKDK**S**GPLKPGVDTAEVTIKSVVRPFYRFHDPNPKVLKFADNQVDASVTLVRLRYAPPVVKQVSTRA  
**E48:** **S****S**KLFLFKDK**S**GPLKPGVDTAEVTIKSVVRPFYRFHDPNPKVLKFADNQVDASVTLVRLRYAPPVVKQVSTRA  
D24: YSVARNAPRAALALVSYLPLP**T**NRLCKLLSEDK  
**E24:** YSVARNAPRAALALVSYLPLPTNRLCKLLSEDK  
D48: YSVARNAPRAALALV**S**YLPLPTNRLCKLLSEDK  
**E48:** YSVARNAPRAALALVSYLPLPTNRLCKLLSEDK

## Spot No. 23

Changed pattern on DIGE gel:

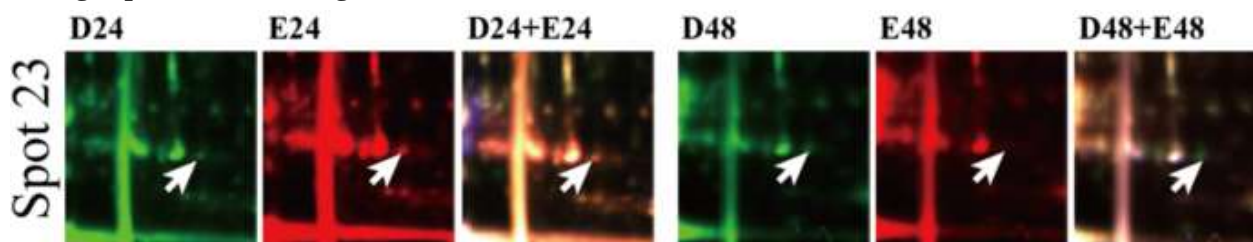

**Location in rubber genome:** scaffold1222\_175215.mRNA1

**Protein name:** Rubber elongation factor protein/REF258

**Predicted 3-D structure and phosphorylated amino acids:**

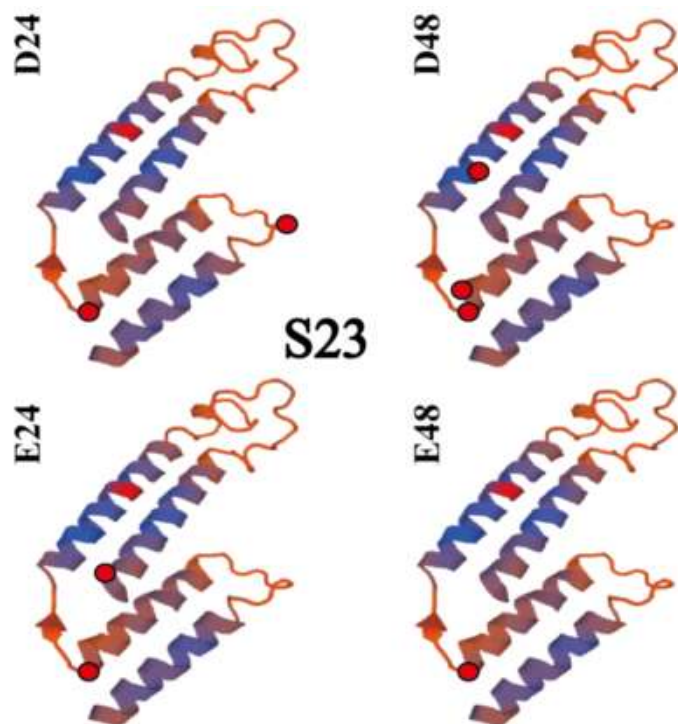

**Detail information for phosphorylation of amino acid sites:**

D24: MASLLGAASNVINAASNVVEEAVKGVENAQQEVANAVSNPSNIVKDVASAATDIVEEAAKGVENVQKEVANAVSN  
E24: MASLLGAASNVINAASNVVEEAVKGVENAQQEVANAVSNPSNIVKDVASAATDIVEEAAKGVENVQKEVANAVSN  
D48: MASLLGAASNVINAASNVVEEAVKGVENAQQEVANAVSNPSNIVKDVASAATDIVEEAAKGVENVQKEVANAVSN  
E48: MASLLGAASNVINAASNVVEEAVKGVENAQQEVANAVSNPSNIVKDVASAATDIVEEAAKGVENVQKEVANAVSN  
D24: SSNIVKDVASAATDIVEEAAKVVDNVQQGVVSAASNVVEEAAKGVGNIQEKVDDEEEDTLKYLDIVQAALVLALV  
E24: SSNIVKDVASAATDIVEEAAKVVDNVQQGVVSAASNVVEEAAKGVGNIQEKVDDEEEDTLKYLDIVQAALVLALV  
D48: SSNIVKDVASAATDIVEEAAKVVDNVQQGVVSAASNVVEEAAKGVGNIQEKVDDEEEDTLKYLDIVQAALVLALV  
E48: SSNIVKDVASAATDIVEEAAKVVDNVQQGVVSAASNVVEEAAKGVGNIQEKVDDEEEDTLKYLDIVQAALVLALV  
D24: SSSKLYLFVKDKSGPLKPGVDTAEVTIKSVVRPFYFRHDPNPKVLKFADNQVDASVTLVLRYPVVKQVSTRA  
E24: SSSKLYLFVKDKSGPLKPGVDTAEVTIKSVVRPFYFRHDPNPKVLKFADNQVDASVTLVLRYPVVKQVSTRA  
D48: SSSKLYLFVKDKSGPLKPGVDTAEVTIKSVVRPFYFRHDPNPKVLKFADNQVDASVTLVLRYPVVKQVSTRA  
E48: SSSKLYLFVKDKSGPLKPGVDTAEVTIKSVVRPFYFRHDPNPKVLKFADNQVDASVTLVLRYPVVKQVSTRA  
D24: YSVARNAPRAALALVSYLPLPTNRLCKLLSEDK  
E24: YSVARNAPRAALALVSYLPLPTNRLCKLLSEDK  
D48: YSVARNAPRAALALVSYLPLPTNRLCKLLSEDK  
E48: YSVARNAPRAALALVSYLPLPTNRLCKLLSEDK

## Spot No. 24

Changed pattern on DIGE gel:

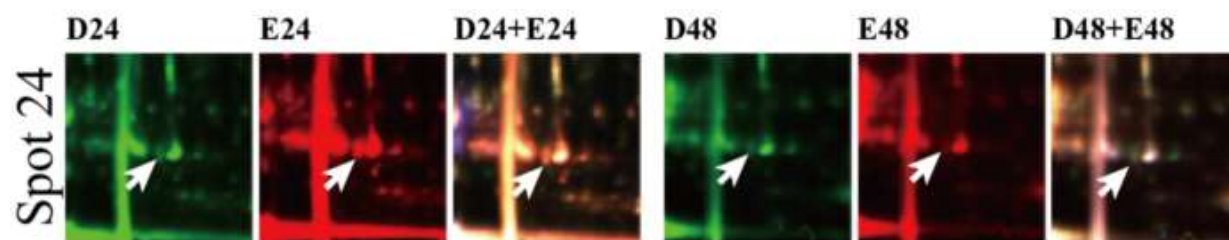

**Location in rubber genome:** scaffold1222\_175215.mRNA1

**Protein name:** Rubber elongation factor protein/REF258

**Predicted 3-D structure and phosphorylated amino acids:**

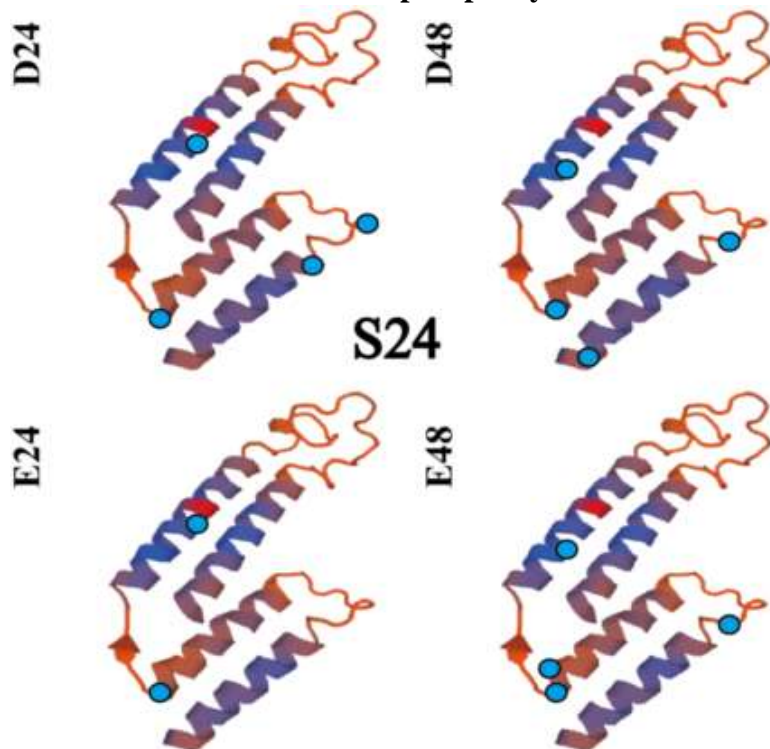

**Detail information for phosphorylation of amino acid sites:**

D24: MASLLGAASNVINAASNVEEAVKGVENAQQEVANAVSNPSNIVKDVASAATDIVEEAAKGVENVQKEVANAVSN  
E24: MASLLGAASNVINAASNVEEAVKGVENAQQEVANAVSNPSNIVKDVASAATDIVEEAAKGVENVQKEVANAVSN  
D48: MASLLGAASNVINAASNVEEAVKGVENAQQEVANAVSNPSNIVKDVASAATDIVEEAAKGVENVQKEVANAVSN  
E48: MASLLGAASNVINAASNVEEAVKGVENAQQEVANAVSNPSNIVKDVASAATDIVEEAAKGVENVQKEVANAVSN  
D24: SSNIVKDVASAATDIVEEAAKVVDNVQQGVVSAASSNVVEEAAKGVGNIQEKVDDEEEDTLKYLDIVQAALVLALV  
E24: SSNIVKDVASAATDIVEEAAKVVDNVQQGVVSAASSNVVEEAAKGVGNIQEKVDDEEEDTLKYLDIVQAALVLALV  
D48: SSNIVKDVASAATDIVEEAAKVVDNVQQGVVSAASSNVVEEAAKGVGNIQEKVDDEEEDTLKYLDIVQAALVLALV  
E48: SSNIVKDVASAATDIVEEAAKVVDNVQQGVVSAASSNVVEEAAKGVGNIQEKVDDEEEDTLKYLDIVQAALVLALV  
D24: SSSKLYLFVKDKSGPLKPGVDTAEVTIKSVVRPFYFRHDPNPKVLKFADNQVDASVTLVRLRYAPPVVKQVSTRA  
E24: SSSKLYLFVKDKSGPLKPGVDTAEVTIKSVVRPFYFRHDPNPKVLKFADNQVDASVTLVRLRYAPPVVKQVSTRA  
D48: SSSKLYLFVKDKSGPLKPGVDTAEVTIKSVVRPFYFRHDPNPKVLKFADNQVDASVTLVRLRYAPPVVKQVSTRA  
E48: SSSKLYLFVKDKSGPLKPGVDTAEVTIKSVVRPFYFRHDPNPKVLKFADNQVDASVTLVRLRYAPPVVKQVSTRA  
D24: YSVARNAPRAALALVSYLPLPTNRLCKLLSEDK  
E24: YSVARNAPRAALALVSYLPLPTNRLCKLLSEDK  
D48: YSVARNAPRAALALVSYLPLPTNRLCKLLSEDK  
E48: YSVARNAPRAALALVSYLPLPTNRLCKLLSEDK



Spot No. 27

Changed pattern on DIGE gel:

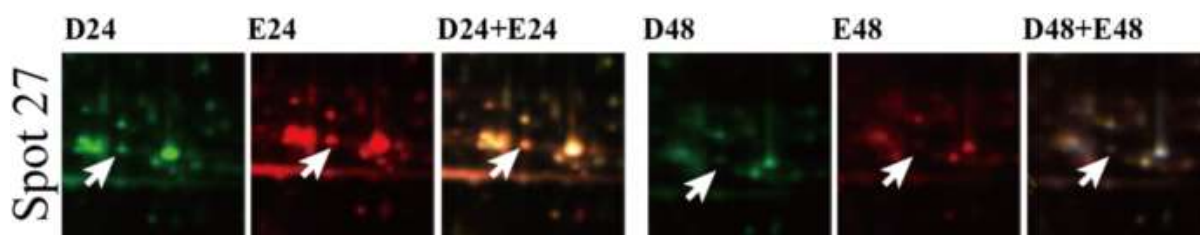

Location in rubber genome: scaffold1222\_175215.mRNA1

Protein name: Rubber elongation factor protein/REF258

Predicted 3-D structure and phosphorylated amino acids:

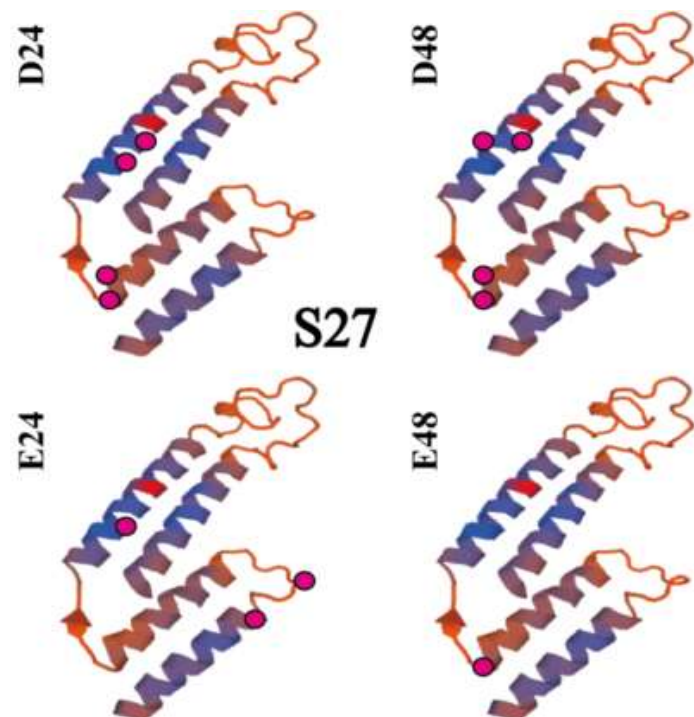

Detail information for phosphorylation of amino acid sites:

D24: MASLLGAASNVINAASNVEEAVKGVENAQQEVANAVSNPSNIVKDVASAATDIVEEAAKGVENVQKEVANAVSN

E24: MASLLGAASNVINAASNVEEAVKGVENAQQEVANAVSNPSNIVKDVASAATTDIVEEAAKGVENVQKEVANAVSN

D48: MASLLGAASNVINAASNVEEAVKGVENAQQEVANAVSNPSNIVKDVASAATDIVEEAAKGVENVQKEVANAVSN

E48: MASLLGAASNVINAASNVEEAVKGVENAQQEVANAVSNPSNIVKDVASAATDIVEEAAKGVENVQKEVANAVSN

D24: SSNIVKDVASAATDIVEEAAKVVDNVQQGVVSASNVVEEAAKGVGNIQEKVDDEEEDTLKYLDIVQAALVLALV

E24: SSNIVKDVASAATDIVEEAAKVVDNVQQGVVSAASNVEEAAKGVGNIQEKVDDEEEDTLKYLDIVQAALVLALV

D48: SSNIVKDVASAATDIVEEAAKVVDNVQQGVVSASNVVEEAAKGVGNIQEKVDDEEEDTLKYLDIVQAALVLALV

E48: SSNIVKDVASAATDIVEEAAKVVDNVQQGVVSASNVVEEAAKGVGNIQEKVDDEEEDTLKYLDIVQAALVLALV

D24: SSSKLYLFVKDKSGPLKPGVDTAEVTIKSVVRPFYRFHDPNPKVLKFADNQVDASVTLVLRYPVVKQVSTRA

E24: SSSKLYLFVKDKSGPLKPGVDTAEVTIKSVVRPFYRFHDPNPKVLKFADNQVDASVTLVLRYPVVKQVSTRA

D48: SSSKLYLFVKDKSGPLKPGVDTAEVTIKSVVRPFYRFHDPNPKVLKFADNQVDASVTLVLRYPVVKQVSTRA

E48: SSSKLYLFVKDKSGPLKPGVDTAEVTIKSVVRPFYRFHDPNPKVLKFADNQVDASVTLVLRYPVVKQVSTRA

D24: YSVARNAPRAALALVSYLPLPTNRLCKLLSEDK

E24: YSVARNAPRAALALVSYLPLPTNRLCKLLSEDK

D48: YSVARNAPRAALALVSYLPLPTNRLCKLLSEDK

E48: YSVARNAPRAALALVSYLPLPTNRLCKLLSEDK

# Protein name: [SRPP204](#)

Location of the [three](#) spots identified as [SRPP204](#) by MS from 2-D DIGE gels:

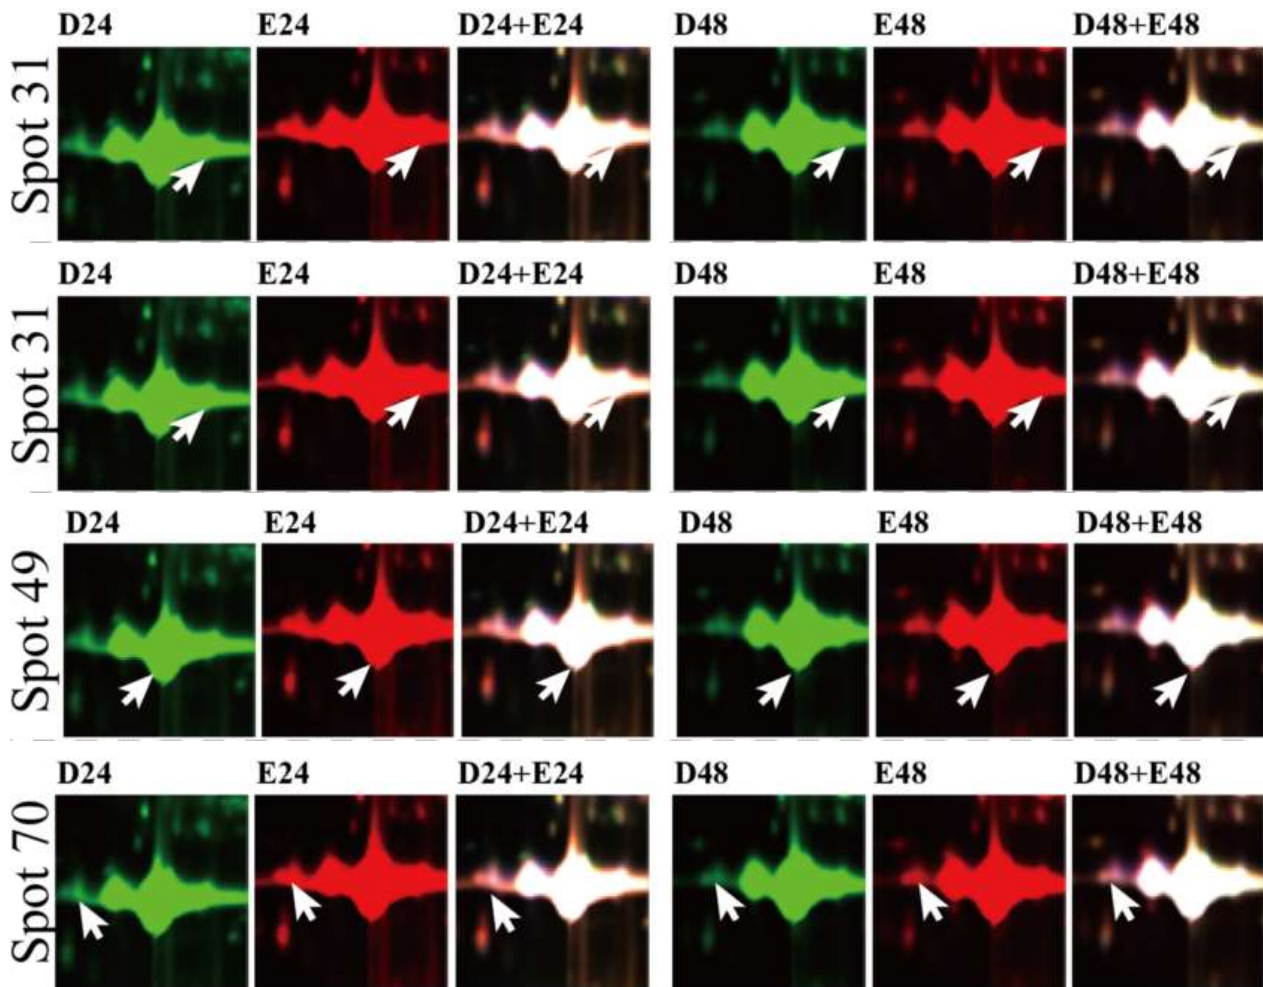

Detail information for phosphorylation of amino acid sites in [SRPP204](#):

**Spot 31** **Spot 49** **Spot 70** **Share**

|      |                          |   |   |   |   |   |   |   |   |   |   |   |   |   |   |   |   |   |   |   |   |   |   |   |   |   |   |   |   |   |   |   |   |   |   |   |   |   |   |   |   |   |   |   |   |   |   |   |   |   |   |   |   |   |   |   |   |   |   |   |   |   |   |   |   |   |   |   |   |   |   |   |   |   |   |   |   |   |   |   |   |   |   |   |   |   |   |   |
|------|--------------------------|---|---|---|---|---|---|---|---|---|---|---|---|---|---|---|---|---|---|---|---|---|---|---|---|---|---|---|---|---|---|---|---|---|---|---|---|---|---|---|---|---|---|---|---|---|---|---|---|---|---|---|---|---|---|---|---|---|---|---|---|---|---|---|---|---|---|---|---|---|---|---|---|---|---|---|---|---|---|---|---|---|---|---|---|---|---|---|
| D24h | MAEEVEERLKYLDVFRAAGVYAVD | S | F | T | L | Y | A | K | D | I | S | G | P | L | K | P | G | V | D | I | E | N | V | K | T | V | I | P | V | Y | I | P | L | E | A | V | K | F | V | D | K | I | V | D | V | S | I | L | D | G | V | V | P | P | V | I | K | Q | V | S | A | Q | T | Y | S | V | A | Q | D | A | P |   |   |   |   |   |   |   |   |   |   |   |   |   |   |   |   |   |
| E24h | MAEEVEERLKYLDVFRAAGVYAVD | S | F | T | L | Y | A | K | D | I | S | G | P | L | K | P | G | V | D | I | E | N | V | K | T | V | I | P | V | Y | I | P | L | E | A | V | K | F | V | D | K | I | V | D | V | S | I | L | D | G | V | V | P | P | V | I | K | Q | V | S | A | Q | T | Y | S | V | A | Q | D | A | P |   |   |   |   |   |   |   |   |   |   |   |   |   |   |   |   |   |
| D48h | MAEEVEERLKYLDVFRAAGVYAVD | S | F | T | L | Y | A | K | D | I | S | G | P | L | K | P | G | V | D | I | E | N | V | K | T | V | I | P | V | Y | I | P | L | E | A | V | K | F | V | D | K | I | V | D | V | S | I | L | D | G | V | V | P | P | V | I | K | Q | V | S | A | Q | T | Y | S | V | A | Q | D | A | P |   |   |   |   |   |   |   |   |   |   |   |   |   |   |   |   |   |
| E48h | MAEEVEERLKYLDVFRAAGVYAVD | S | F | T | L | Y | A | K | D | I | S | G | P | L | K | P | G | V | D | I | E | N | V | K | T | V | I | P | V | Y | I | P | L | E | A | V | K | F | V | D | K | I | V | D | V | S | I | L | D | G | V | V | P | P | V | I | K | Q | V | S | A | Q | T | Y | S | V | A | Q | D | A | P |   |   |   |   |   |   |   |   |   |   |   |   |   |   |   |   |   |
| D24h | RIVLDVA                  | S | V | F | N | T | G | V | Q | E | G | A | K | A | L | Y | A | N | L | E | P | K | A | E | Q | Y | A | V | I | T | W | R | A | L | N | K | L | P | L | P | Q | V | A | N | V | V | P | T | A | V | F | S | E | K | Y | N | D | V | V | R | G | T | T | E | Q | G | Y | R | V | S | Y | L | P | L | L | P | T | E | K | I | K | V | F | G | D | E | A | S |
| E24h | RIVLDVA                  | S | V | F | N | T | G | V | Q | E | G | A | K | A | L | Y | A | N | L | E | P | K | A | E | Q | Y | A | V | I | T | W | R | A | L | N | K | L | P | L | P | Q | V | A | N | V | V | P | T | A | V | F | S | E | K | Y | N | D | V | V | R | G | T | T | E | Q | G | Y | R | V | S | Y | L | P | L | L | P | T | E | K | I | K | V | F | G | D | E | A | S |
| D48h | RIVLDVA                  | S | V | F | N | T | G | V | Q | E | G | A | K | A | L | Y | A | N | L | E | P | K | A | E | Q | Y | A | V | I | T | W | R | A | L | N | K | L | P | L | P | Q | V | A | N | V | V | P | T | A | V | F | S | E | K | Y | N | D | V | V | R | G | T | T | E | Q | G | Y | R | V | S | Y | L | P | L | L | P | T | E | K | I | K | V | F | G | D | E | A | S |
| E48h | RIVLDVA                  | S | V | F | N | T | G | V | Q | E | G | A | K | A | L | Y | A | N | L | E | P | K | A | E | Q | Y | A | V | I | T | W | R | A | L | N | K | L | P | L | P | Q | V | A | N | V | V | P | T | A | V | F | S | E | K | Y | N | D | V | V | R | G | T | T | E | Q | G | Y | R | V | S | Y | L | P | L | L | P | T | E | K | I | K | V | F | G | D | E | A | S |

Predicted 3-D structure and phosphorylated amino acids in different [SRPP204](#) isoforms:

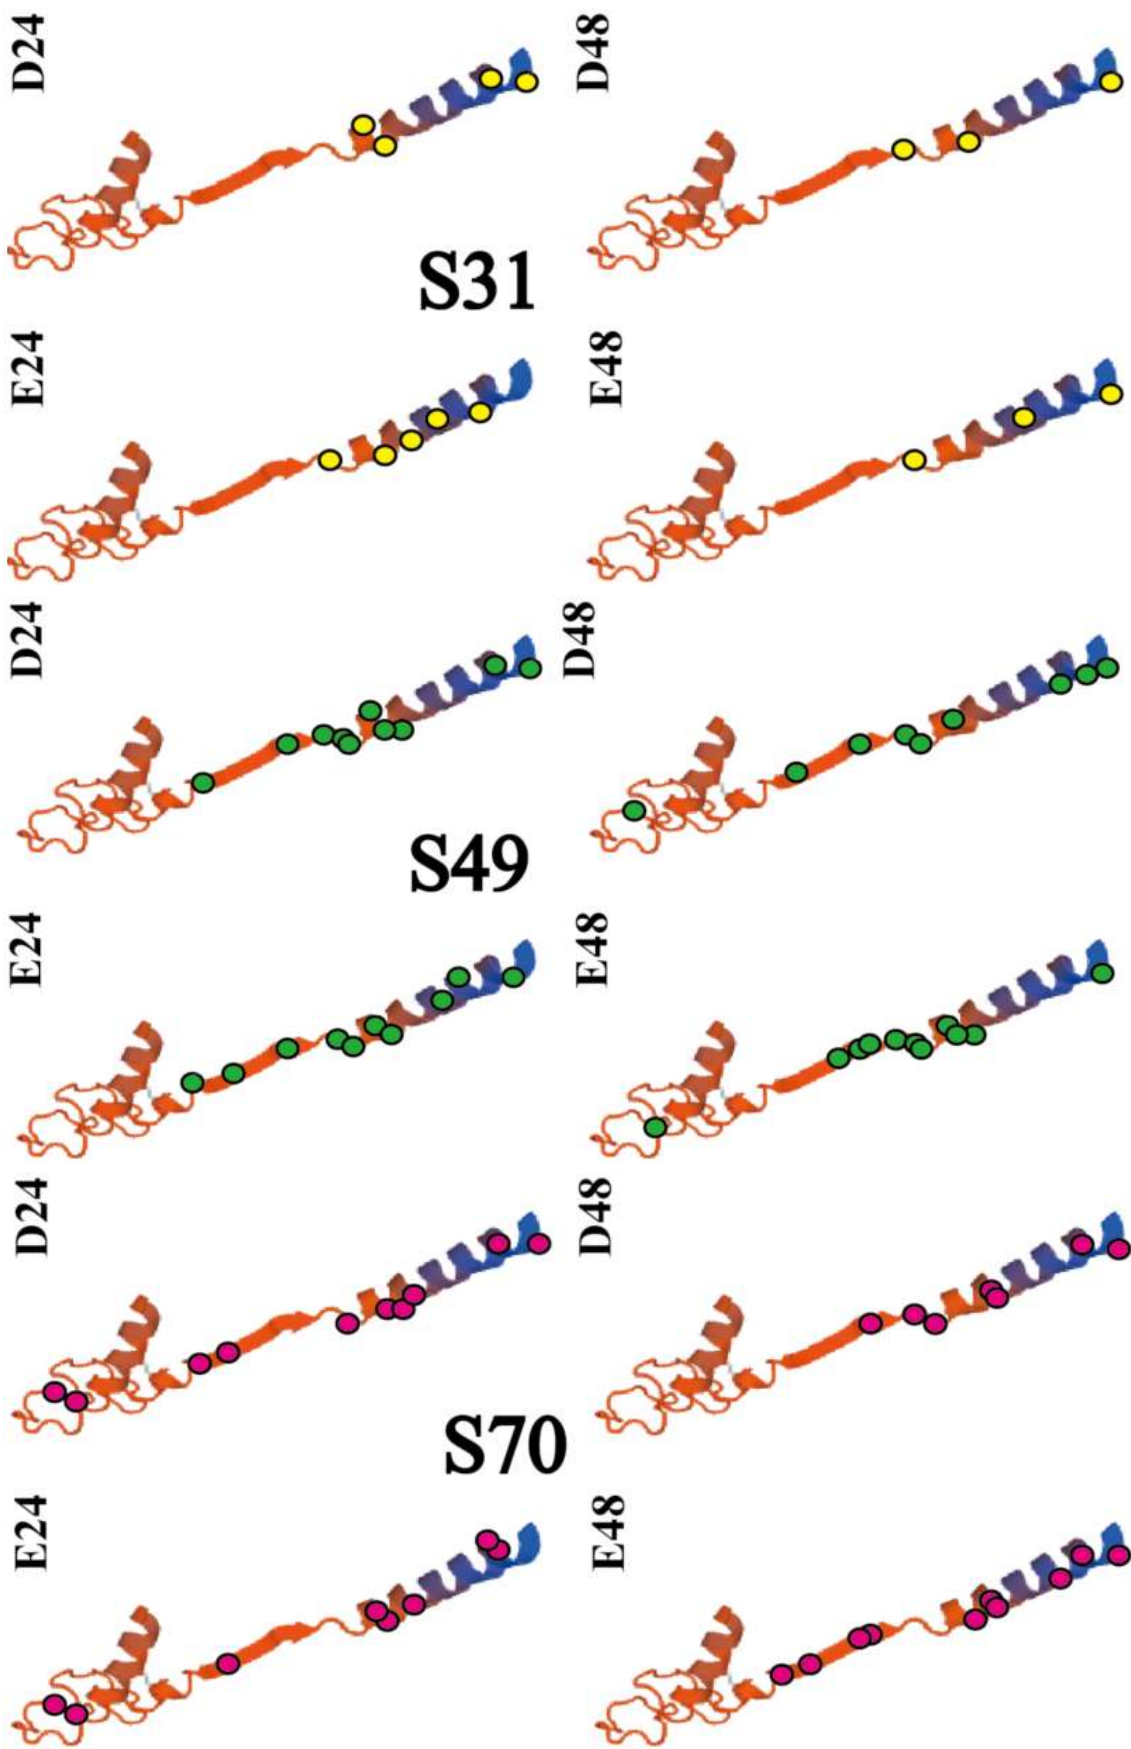



## Spot No. 31

Changed pattern on DIGE gel:

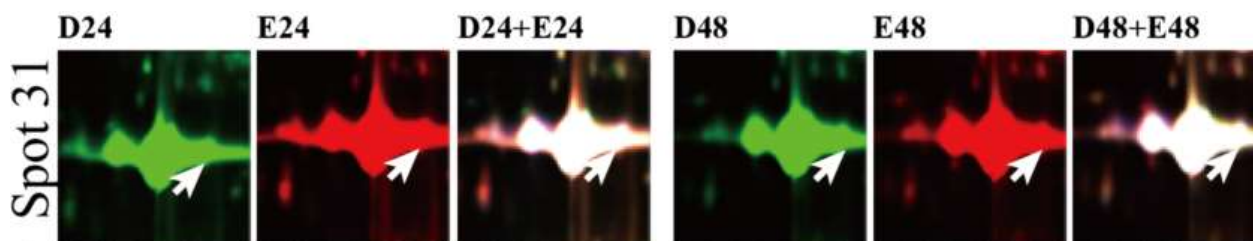

Location in rubber genome: scaffold1222\_60641.mRNA1

Protein name: Small rubber particle protein/SRPP204

Predicted 3-D structure and phosphorylated amino acids:

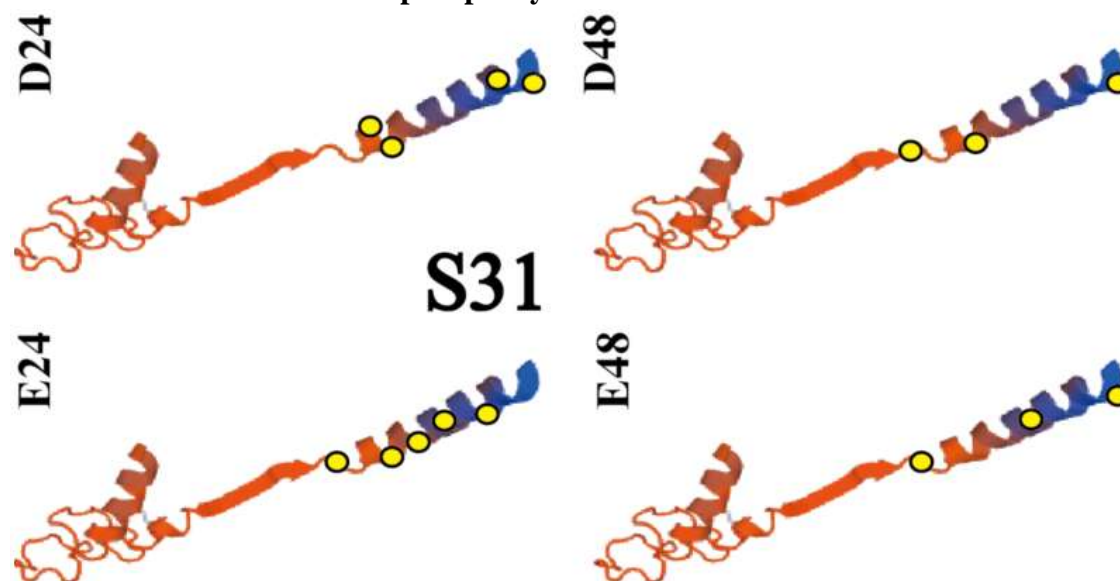

Detail information for phosphorylation of amino acid sites:

D24: MAEEVEERLKYLDFVRAAGVYAVDSFSSTLYLYAKDISGPLKPGVDTIENVVKTVVTPVYYYIPLEAVKFVDKTVD

E24: MAEEVEERLKYLDFVRAAGVYAVDSFSSTLYLYAKDISGPLKPGVDTIENVVKTVVTPVYYYIPLEAVKFVDKTVD

D48: MAEEVEERLKYLDFVRAAGVYAVDSFSSTLYLYAKDISGPLKPGVDTIENVVKTVVTPVYYYIPLEAVKFVDKTVD

E48: MAEEVEERLKYLDFVRAAGVYAVDSFSSTLYLYAKDISGPLKPGVDTIENVVKTVVTPVYYYIPLEAVKFVDKTVD

D24: VSVTSLDGVVPPVIKQVSAQTYSVAQDAPRIVLDVASSVFNTGVQEGAKALYANLEPKAEQYAVITWRALNKLPL

E24: VSVTSLDGVVPPVIKQVSAQTYSVAQDAPRIVLDVASSVFNTGVQEGAKALYANLEPKAEQYAVITWRALNKLPL

D48: VSVTSLDGVVPPVIKQVSAQTYSVAQDAPRIVLDVASSVFNTGVQEGAKALYANLEPKAEQYAVITWRALNKLPL

E48: VSVTSLDGVVPPVIKQVSAQTYSVAQDAPRIVLDVASSVFNTGVQEGAKALYANLEPKAEQYAVITWRALNKLPL

D24: VPQVANVVVPTAVYFSEKYNDVVRGTTEQGYRVSSYLPLLPTEKITKVFGDEAS

E24: VPQVANVVVPTAVYFSEKYNDVVRGTTEQGYRVSSYLPLLPTEKITKVFGDEAS

D48: VPQVANVVVPTAVYFSEKYNDVVRGTTEQGYRVSSYLPLLPTEKITKVFGDEAS

E48: VPQVANVVVPTAVYFSEKYNDVVRGTTEQGYRVSSYLPLLPTEKITKVFGDEAS

Spot No. 49

Changed pattern on DIGE gel:

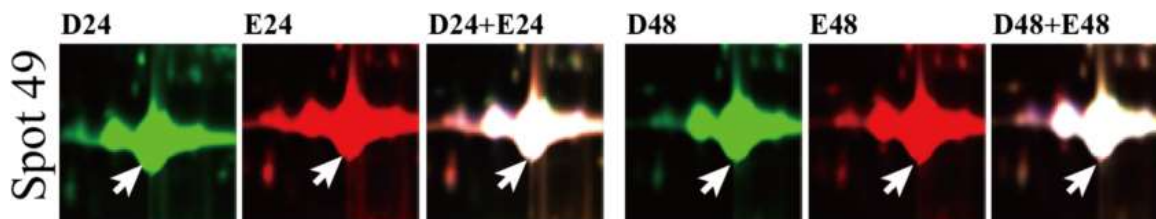

Location in rubber genome: scaffold1222\_60641.mRNA1

Protein name: Small rubber particle protein/SRPP204

Predicted 3-D structure and phosphorylated amino acids:

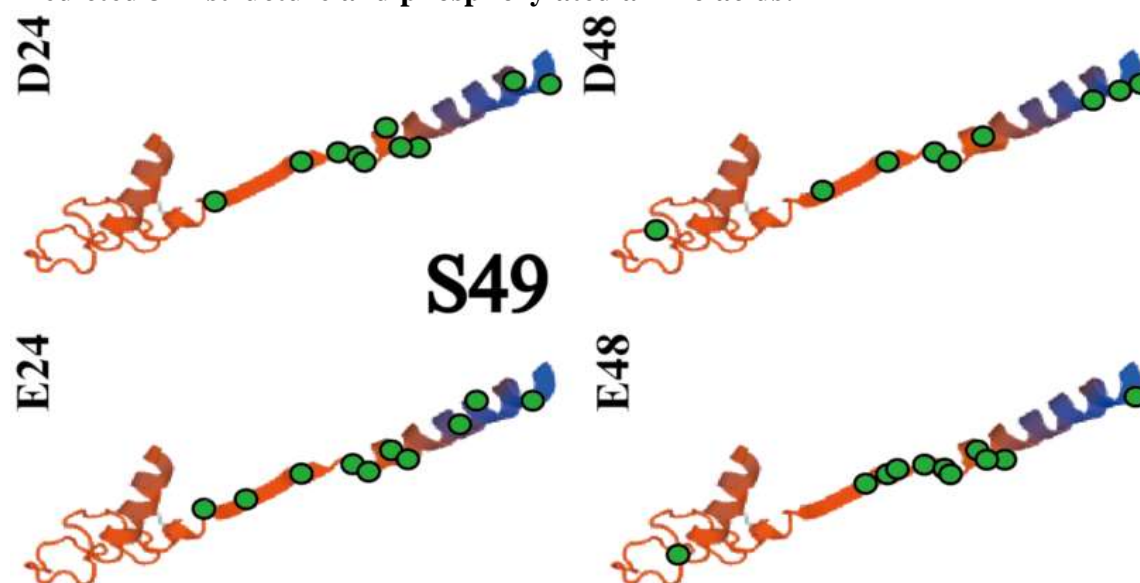

Detail information for phosphorylation of amino acid sites:

D24: MAEEVEEERLKYLDFVRAAGVYAVDSFSSTLYLYAKDISGPLKPGVD**T**IENVVKTVVTPVYYIPLEAVKFVDK**T**V**D**

E24: MAEEVEEERLKYLDFVRAAGVYAVDSFSSTLYLYAKDISGPLKPGVD**D**IENVVKTVV**T**IPVYYIPLEAVKFVDK**T**V**D**

D48: MAEEVEEERLKYLDFVRAAGVYAVDSF**S**TLYLYAKDISGPLKPGVD**T**IENVVK**T**VVTPVYYIPLEAVKFVDK**T**V**D**

E48: MAEEVEEERLKYLDFVRAAGVYAVD**S**FSTLYLYAKDISGPLKPGVD**T**IENVVKTVVTPVYYIPLEAV**K**FVDK**T**V**D**

D24: V**S**V**T****S**LDGVVPPV**I**K**Q**VSA**Q**T**S**VAQDAPRIVLDVASSVFNTGVQEGAKALYANLEPKAEQYAVITWRALNKLPL

E24: V**S**V**T****S**LDGVVPPV**I**K**Q**VSA**Q**T**S**VAQDAPRIVLDVA**S**SVFNTGVQEGAKALYANLEPKAEQYAVITWRALNKLPL

D48: V**S**V**T****S**LDGVVPPV**I**K**Q**VSA**Q**T**S**VAQDAPRIVLDVA**S**SVFNTGVQEGAKALYANLEPKAEQYAVITWRALNKLPL

E48: V**S**V**T****S**LDGVVPPV**I**K**Q**VSA**Q**T**S**VAQDAPRIVLDVA**S**SVFNTGVQEGAKALYANLEPKAEQYAVITWRALNKLPL

D24: VPQVANVVVPTAVYFSEKYNDVVRGTTEQGYRV**S**SYLPLLPTEK**I**TKVFGDEAS

E24: VPQVANVVVPTAVYFSEKYNDVVRGTTEQGYRVSSYLPLLP**T**EK**I**TKVFGDEAS

D48: VPQVANVVVPTAVYFSEKYNDVVRGT**T**EQGYRVSSYLPLLP**T**EK**I**TKVFGDEAS

E48: VPQVANVVVPTAVYFSEKYNDVVRGTTEQGYRVSSYLPLLPTEK**I**TKVFGDEAS

## Spot No. 70

Changed pattern on DIGE gel:

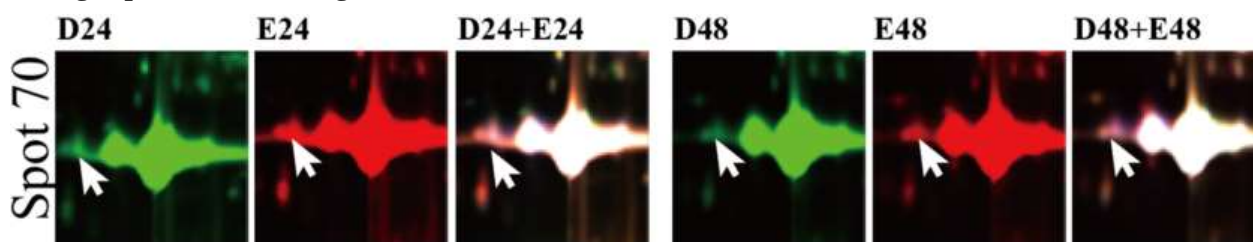

**Location in rubber genome:** scaffold1222\_60641.mRNA1

**Protein name:** Small rubber particle protein/SRPP204

**Predicted 3-D structure and phosphorylated amino acids:**

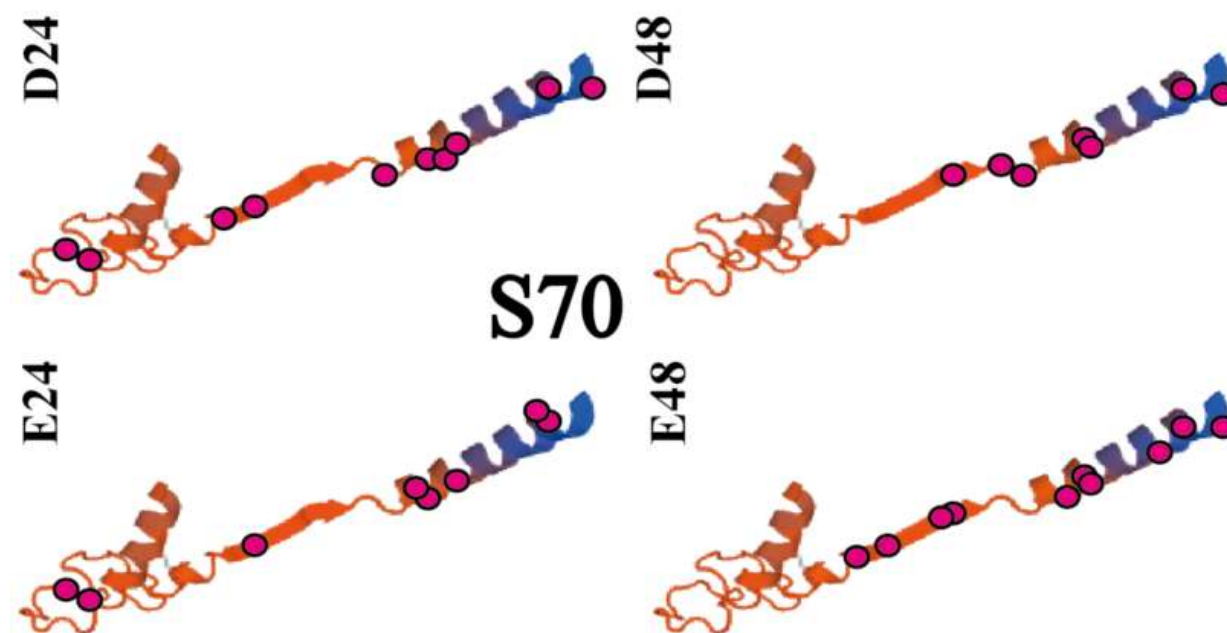

Detail information for phosphorylation of amino acid sites:

D24: MAEEVEERLKYLDVRAAGVYAVDSFSTLYLYAKDISGPLKPGVDTIENVVKTVVTPVYYIPLEAVKFVDKTV

E24: MAEEVEERLKYLDVRAAGVYAVDSFSTLYLYAKDISGPLKPGVDTIENVVKTVVTPVYYIPLEAVKFVDKTV

D48: MAEEVEERLKYLDVRAAGVYAVDSFSTLYLYAKDISGPLKPGVDTIENVVKTVVTPVYYIPLEAVKFVDKTVD

E48: MAEEVEERLKYLDVRAAGVYAVDSFSTLYLYAKDISGPLKPGVDTIENVVKTVVTPVYYIPLEAVKFVDKTVD

D24: VSVTSLDGVVPPVIKQVSAQTSVAQDAPRIVLDVASSVFNTGVQEGAKALYANLEPKAEQYAVITWRALNKLPL

E24: VSVTSLDGVVPPVIKQVSAQTYSVAQDAPRIVLDVASSVFNTGVQEGAKALYANLEPKAEQYAVITWRALNKLPL

D48: VSVTSLDGVVPPVIKQVSAQTYSVAQDAPRIVLDVASSVFNTGVQEGAKALYANLEPKAEQYAVITWRALNKLPL

E48: VSVTSLDGVVPPVIKQVSAQTYSVAQDAPRIVLDVASSVFNTGVQEGAKALYANLEPKAEQYAVITWRALNKLPL

D24: VPQVANVVVPTAVYFSEKYNDVVRGTTEQGYRVSYLPLLTEKITTKVFGDEAS

E24: VPQVANVVVPTAVYFSEKYNDVVRGTTEQGYRVSSYLPLLTEKITKVFGDEAS

D48: VPQVANVVVPTAVYFSEKYNDVVRGTTEQGYRVSYLPLLTEKITTKVFGDEAS

E48: VPQVANVVVPTAVYFSEKYNDVVRGTTEQGYRVSYLPLLTEKITTKVFGDEAS
